# Supplementary material for: Recognition of O6-benzyl-2′-deoxyguanosine by a perimidinone-derived synthetic nucleoside: a DNA interstrand stacking interaction
Source: PubMed Central journal article supplement (PMC3753623; doi:10.1093/nar/gkt488), 2013-07-08
Supplement: supp_gkt488_nar-00771-f-2013-File002.pdf [file supp_gkt488_nar-00771-f-2013-File002.pdf]

**Recognition of *O*<sup>6</sup>-Benzyl-2'-deoxyguanosine by a Perimidinone-Derived Synthetic Nucleoside: A DNA Interstrand Stacking Interaction**

Supplementary Data

Ewa A. Kowal,<sup>1</sup> Rahul R. Lad,<sup>2</sup> Pradeep S. Pallan,<sup>3</sup> Elizabeth Dhummakupt,<sup>1</sup> Zdzislaw Wawrzak,<sup>4</sup> Martin Egli,<sup>3</sup> Shana Sturla<sup>2</sup> and Michael P. Stone<sup>1,3\*</sup>

<sup>1</sup>Department of Chemistry, Center in Molecular Toxicology, Vanderbilt-Ingram Cancer Center, Center in Structural Biology, Vanderbilt University, Nashville, TN 37235

<sup>2</sup>ETH Zürich, Institute of Food, Nutrition and Health, CH-8092 Zürich, Switzerland

<sup>3</sup>Department of Biochemistry, Vanderbilt University, Nashville, TN 37232

<sup>4</sup>Northwestern University, Synchrotron Research Center, 9700 S Cass Ave, Argonne, IL 60439

\*To whom correspondence should be addressed

Telephone 615-322-2589

FAX 615-322-7591

e-mail [michael.p.stone@vanderbilt.edu](mailto:michael.p.stone@vanderbilt.edu)

## Table of Contents

|                                                                                                                                                            |    |
|------------------------------------------------------------------------------------------------------------------------------------------------------------|----|
| Complete listings of references (30), (31), (45), (59)                                                                                                     | 4  |
| Table S1, CIF File for Diffraction Data of the Second Crystal of the DDD-XY Duplex                                                                         | 6  |
| Table S2, Crystal and Data Collection Statistics for the First Crystal Used to Obtain Phases<br>for the DDD-XY Duplex                                      | 48 |
| Table S3, Crystal Data, Data Collection, and Refinement Statistics for the Second Crystal<br>Used to Obtain the Final Structure of the DDD-XY Duplex       | 49 |
| Table S4, NMR Restraints Used for the DDD-GY Structure Calculations and Refinement<br>Statistics                                                           | 50 |
| Table S5, Structural Statistics for the DDD-GY Duplex                                                                                                      | 51 |
| Figure S1, Structure of the DDD-XY duplex with water molecules and Sr <sup>2+</sup> ion<br>and spermine molecule                                           | 52 |
| Figure S2, Interbase pair parameters, helical rise, roll, and twist for the DDD-XY, DDD<br>(PDB entry 355D) duplexes                                       | 53 |
| Figure S3, Comparison of backbone torsion angles $\alpha$ and $\beta$ in the crystal structures<br>of the DDD-XY, DDD (PDB entry 355D) duplexes            | 54 |
| Figure S4, Comparison of $\gamma$ , $\delta$ , and $\epsilon$ angles in the crystal structures of the DDD-XY,<br>DDD (PDB entry 355D) duplexes             | 55 |
| Figure S5, Comparison of $\chi$ and $\zeta$ angles in the crystal structures of the DDD-XY,<br>DDD (PDB entry 355D) duplexes                               | 56 |
| Figure S6, NOESY spectrum of the DDD-XY duplex showing sequential NOEs<br>between the aromatic and anomeric protons from C <sup>1</sup> to G <sup>12</sup> | 57 |
| Figure S7, Interstrand NOE cross peaks between complementary bases for the DDD-XY                                                                          |    |

|                                                                                                                                          |    |
|------------------------------------------------------------------------------------------------------------------------------------------|----|
| duplex and NOE connectivity of DDD-XY duplex, for the imino protons                                                                      | 58 |
| Figure S8, NMR spectra, showing the imino proton resonances for the DDD-XY duplex<br>as a function of temperature                        | 59 |
| Figure S9, The average structure obtained from a series of rMD calculations for the<br>DDD-GY duplex                                     | 60 |
| Figure S10, The superimposed nine structures obtained from a series of rMD calculations<br>for the DDD-GY duplex                         | 61 |
| Figure S11, Interbase pair parameters helical rise, roll, and twist for the DDD-GY,<br>DDD (PDB entry 355D) duplexes                     | 62 |
| Figure S12, Comparison of backbone torsion angles $\alpha$ and $\beta$ in the structures of the<br>DDD-GY, DDD (PDB entry 355D) duplexes | 63 |
| Figure S13, Comparison of $\gamma$ , $\delta$ , and $\epsilon$ angles in the structures of the DDD-GY,<br>DDD (PDB entry 355D) duplexes  | 64 |
| Figure S14, Comparison of $\chi$ and $\zeta$ angles in the crystal structures of the DDD-GY,<br>DDD (PDB entry 355D) duplexes.           | 65 |

## Complete Listing of Reference (30).

30. Adams, P. D.; Afonine, P. V.; Bunkoczi, G.; Chen, V. B.; Davis, I. W.; Echols, N.; Headd, J. J.; Hung, L. W.; Kapral, G. J.; Grosse-Kunstleve, R. W.; McCoy, A. J.; Moriarty, N. W.; Oeffner, R.; Read, R. J.; Richardson, D. C.; Richardson, J. S.; Terwilliger, T. C.; Zwart, P. H. *Acta Crystallogr. D* **2010**, *66*, 213-221.

## Complete Listing of Reference (31).

31. Brunger, A. T.; et al. Adams, P. D.; Clore, G. M.; DeLano, W. L.; Gros, P.; Grosse-46, R. W.; Jiang, J. S.; Kuszewski, J.; Nilges, M.; Pannu, N. S.; Read, R. J.; Rice, L. M.; Simonson, T.; Warren, G. L. *Acta Crystallogr. D* **1998**, *54*, 905-921.

## Complete Listing of Reference (45).

45. Frisch, M. J.; Trucks, G. W.; Schlegel, H. B.; Scuseria, G. E.; Robb, M. A.; Cheeseman, J. R.; Montgomery, J. A.; Vreven, T.; Kudin, K. N.; Burant, J. C.; Millam, J. M.; Iyengar, S. S.; Tomasi, J.; Barone, V.; Mennucci, B.; Cossi, M.; Scalmani, G.; Rega, N.; Petersson, G. A.; Nakatsuji, H.; Hada, M.; Ehara, M.; Toyota, K.; Fukuda, R.; Hasegawa, J.; Ishida, M.; Nakajima, T.; Honda, Y.; Kitao, O.; Nakai, H.; Klene, M.; Li, X.; Knox, J. E.; Hratchian, H. P.; Cross, J. B.; Adamo, C.; Jaramillo, J.; Gomperts, R.; Stratmann, R. E.; Yazyev, O.; Austin, A. J.; Cammi, R.; Pomelli, C.; Pomelli, J.; Ochterski, W.; Ayala, P. Y.; Morokuma, K.; Voth, G. A.; Salvador, P.; Dannenberg, J. J.; Zakrzewska, V. G.; Daniels, A. D.; Farkas, O.; Rabuck, A. D.; Raghavachari, K.; Ortiz, J. V. *Gaussian, Inc., Wallingford, CT* **2004**.

Complete Listing of Reference (59).

59. Matsuda, S.; Fillo, J. D.; Henry, A. A.; Rai, P.; Wilkens, S. J.; Dwyer, T. J.; Geierstanger, B. H.; Wemmer, D. E.; Schultz, P. G.; Spraggon, G.; Romesberg, F. E. *J. Am. Chem. Soc.* **2007**, *129*, 10466-10473.

**Table S1.** CIF File for Diffraction Data of the Second Crystal of the DDD-XY duplex.

```

data_4HQI
#
_audit_conform.dict_name      mmcif_pdbx.dic
_audit_conform.dict_version   1.0695
_audit_conform.dict_location  http://mmcif.pdb.org/dictionaries/ascii/mmcif_pdbx.dic
#
loop_
_audit_author.name
_audit_author.pdbx_ordinal
'Kowal, E.A.' 1
'Lad, R.' 2
'Pallan, P.S.' 3
'Muffly, E.' 4
'Wawrzak, Z.' 5
'Egli, M.' 6
'Sturla, S.J.' 7
'Stone, M.P.' 8
#
_pdbx_database_status.status_code AUTH
_pdbx_database_status.entry_id 4HQI
_pdbx_database_status.deposit_site RCSB
_pdbx_database_status.process_site RCSB
_pdbx_database_status.status_code_sf HPUB
_pdbx_database_status.status_code_mr ?
_pdbx_database_status.SG_entry ?
_pdbx_database_status.status_code_cs ?
#
_database_PDB_rev.num ?
_database_PDB_rev.date ?
_database_PDB_rev.date_original 2012-10-25
_database_PDB_rev.status ?
_database_PDB_rev.replaces ?
_database_PDB_rev.mod_type ?
#
_struct_ref.id 1

```

```

_struct_ref.db_name          PDB
_struct_ref.db_code         4HQI
_struct_ref.pdbx_db_accession 4HQI
_struct_ref.entity_id       1
_struct_ref.biol_id         .
_struct_ref.pdbx_align_begin ?
_struct_ref.pdbx_seq_one_letter_code ?
#
loop_
_struct_ref_seq.align_id
_struct_ref_seq.ref_id
_struct_ref_seq.pdbx_PDB_id_code
_struct_ref_seq.pdbx_strand_id
_struct_ref_seq.seq_align_beg
_struct_ref_seq.pdbx_seq_align_beg_ins_code
_struct_ref_seq.seq_align_end
_struct_ref_seq.pdbx_seq_align_end_ins_code
_struct_ref_seq.pdbx_db_accession
_struct_ref_seq.db_align_beg
_struct_ref_seq.db_align_end
_struct_ref_seq.pdbx_auth_seq_align_beg
_struct_ref_seq.pdbx_auth_seq_align_end
1 1 4HQI A 1 ? 12 ? 4HQI 1 12 1 12
2 1 4HQI B 1 ? 12 ? 4HQI 13 24 13 24
#
_struct_keywords.entry_id    4HQI
_struct_keywords.pdbx_keywords DNA
_struct_keywords.text
;B-form DNA, O6-Benzyl-2'-deoxyguanosine, dPer, Perimidinone-Derived Nucleoside, Dickerson-Drew
Dodecamer, DNA
;
#
_pdbx_struct_assembly.id     1
_pdbx_struct_assembly.details author_and_software_defined_assembly
_pdbx_struct_assembly.method_details PISA
_pdbx_struct_assembly.oligomeric_details dimeric
_pdbx_struct_assembly.oligomeric_count 2

```

```

#
_pdbx_struct_assembly_gen.assembly_id      1
_pdbx_struct_assembly_gen.oper_expression  1
_pdbx_struct_assembly_gen.asym_id_list     A,C,D,E,B,F
#
loop_
_pdbx_struct_assembly_prop.biol_id
_pdbx_struct_assembly_prop.type
_pdbx_struct_assembly_prop.value
_pdbx_struct_assembly_prop.details
1 'ABSA (A^2)' 1890 ?
1 'SSA (A^2)'  4860 ?
1 MORE        -24  ?
#
_pdbx_struct_oper_list.id                  1
_pdbx_struct_oper_list.type                'identity operation'
_pdbx_struct_oper_list.name               1_555
_pdbx_struct_oper_list.symmetry_operation x,y,z
_pdbx_struct_oper_list.matrix[1][1]      1.0000000000
_pdbx_struct_oper_list.matrix[1][2]      0.0000000000
_pdbx_struct_oper_list.matrix[1][3]      0.0000000000
_pdbx_struct_oper_list.vector[1]         0.0000000000
_pdbx_struct_oper_list.matrix[2][1]      0.0000000000
_pdbx_struct_oper_list.matrix[2][2]      1.0000000000
_pdbx_struct_oper_list.matrix[2][3]      0.0000000000
_pdbx_struct_oper_list.vector[2]         0.0000000000
_pdbx_struct_oper_list.matrix[3][1]      0.0000000000
_pdbx_struct_oper_list.matrix[3][2]      0.0000000000
_pdbx_struct_oper_list.matrix[3][3]      1.0000000000
_pdbx_struct_oper_list.vector[3]         0.0000000000
#
_struct_biol.id                            1
_struct_biol.details                        ?
#
loop_
_exptl_crystal_grow.crystal_id
_exptl_crystal_grow.method

```



```

_exptl_crystal_grow.temp
_exptl_crystal_grow.temp_details
_exptl_crystal_grow.pH
_exptl_crystal_grow.pdbx_details
_exptl_crystal_grow.pdbx_pH_range
1 'VAPOR DIFFUSION, HANGING DROP' 291 ? 7.0
;20 mM sodium cacodylate (pH 7.0), 6 mM spermine tetra-HCl, 20 mM LiCl, 40 mM SrCl2 and 5% v/v 2-
Methyl-2,4-pentanediol (MPD), VAPOR DIFFUSION, HANGING DROP, temperature 291K
;
?
2 'VAPOR DIFFUSION, HANGING DROP' 291 ? 7.0
;20 mM sodium cacodylate (pH 7.0), 6 mM spermine tetra-HCl, 40 mM KCl, 10 mM BaCl2 and 5% v/v 2-
Methyl-2,4-pentanediol (MPD), VAPOR DIFFUSION, HANGING DROP, temperature 291K
;
?
#
loop_
_exptl_crystal.id
_exptl_crystal.density_meas
_exptl_crystal.density_Matthews
_exptl_crystal.density_percent_sol
_exptl_crystal.description
_exptl_crystal.F_000
_exptl_crystal.preparation
1 ? 2.46 50.02 ? ? ?
2 ? ? ? ? ? ? ?
#
_cell.entry_id          4HQI
_cell.length_a         26.384
_cell.length_b         36.774
_cell.length_c         77.653
_cell.angle_alpha     90.00
_cell.angle_beta      90.00
_cell.angle_gamma     90.00
_cell.Z_PDB           8
_cell.pdbx_unique_axis ?
_cell.length_a_esd    ?

```

```

_cell.length_b_esd      ?
_cell.length_c_esd      ?
_cell.angle_alpha_esd   ?
_cell.angle_beta_esd    ?
_cell.angle_gamma_esd   ?
#
_symmetry.entry_id       4HQI
_symmetry.space_group_name_H-M 'P 21 21 21'
_symmetry.pdbx_full_space_group_name_H-M ?
_symmetry.cell_setting   ?
_symmetry.Int_Tables_number ?
_symmetry.space_group_name_Hall ?
#
loop_
_diffrn_source.diffraction_id
_diffrn_source.source
_diffrn_source.type
_diffrn_source.pdbx_synchrotron_site
_diffrn_source.pdbx_synchrotron_beamline
_diffrn_source.pdbx_wavelength
_diffrn_source.pdbx_wavelength_list
1 SYNCHROTRON 'APS BEAMLINE 21-ID-D' APS 21-ID-D ? 1.60499
2 SYNCHROTRON 'APS BEAMLINE 21-ID-G' APS 21-ID-G ? 0.97857
#
loop_
_diffrn_detector.diffraction_id
_diffrn_detector.detector
_diffrn_detector.type
_diffrn_detector.pdbx_collection_date
_diffrn_detector.details
1 CCD 'MARMOSAIC 300 mm CCD' 2009-07-17 Si(111)
2 CCD 'MARMOSAIC 300 mm CCD' 2008-07-18 C(111)
#
loop_
_diffrn.id
_diffrn.ambient_temp
_diffrn.ambient_temp_details

```

```

_diffrn.crystal_id
1 100 ? 1
2 100 ? 2
#
loop_
_diffrn_radiation.diffrn_id
_diffrn_radiation.wavelength_id
_diffrn_radiation.pdbx_monochromatic_or_laue_m_l
_diffrn_radiation.monochromator
_diffrn_radiation.pdbx_diffrn_protocol
1 1 M Si(111) 'SINGLE WAVELENGTH'
2 1 M C(111) 'SINGLE WAVELENGTH'
#
_reflns.entry_id          4HQI
_reflns.observed_criterion_sigma_I 5
_reflns.observed_criterion_sigma_F ?
_reflns.d_resolution_low 30.0
_reflns.d_resolution_high 1.70
_reflns.number_obs       8236
_reflns.number_all       8811
_reflns.percent_possible_obs 93.4
_reflns.pdbx_Rmerge_I_obs 0.044
_reflns.pdbx_Rsym_value  ?
_reflns.pdbx_netI_over_sigmaI 52.33
_reflns.B_iso_Wilson_estimate ?
_reflns.pdbx_redundancy  6.4
_reflns.R_free_details  ?
_reflns.limit_h_max      ?
_reflns.limit_h_min      ?
_reflns.limit_k_max      ?
_reflns.limit_k_min      ?
_reflns.limit_l_max      ?
_reflns.limit_l_min      ?
_reflns.observed_criterion_F_max ?
_reflns.observed_criterion_F_min ?
_reflns.pdbx_chi_squared  ?
_reflns.pdbx_scaling_rejects ?

```

```

#
_reflns_shell.d_res_high          1.70
_reflns_shell.d_res_low          1.76
_reflns_shell.percent_possible_all ?
_reflns_shell.Rmerge_I_obs       0.228
_reflns_shell.pdbx_Rsym_value    ?
_reflns_shell.meanI_over_sigI_obs 5.65
_reflns_shell.pdbx_redundancy    4
_reflns_shell.percent_possible_obs ?
_reflns_shell.number_unique_all  524
_reflns_shell.number_measured_all ?
_reflns_shell.number_measured_obs ?
_reflns_shell.number_unique_obs  ?
_reflns_shell.pdbx_chi_squared   ?
#
_refine.entry_id                  4HQI
_refine.ls_number_reflns_obs     7486
_refine.ls_number_reflns_all     ?
_refine.pdbx_ls_sigma_I         ?
_refine.pdbx_ls_sigma_F         ?
_refine.pdbx_data_cutoff_high_absF ?
_refine.pdbx_data_cutoff_low_absF ?
_refine.pdbx_data_cutoff_high_rms_absF ?
_refine.ls_d_res_low            20.67
_refine.ls_d_res_high           1.70
_refine.ls_percent_reflns_obs   93.39
_refine.ls_R_factor_obs         0.26227
_refine.ls_R_factor_all        ?
_refine.ls_R_factor_R_work      0.25885
_refine.ls_R_factor_R_free      0.29823
_refine.ls_R_factor_R_free_error ?
_refine.ls_R_factor_R_free_error_details ?
_refine.ls_percent_reflns_R_free 8.9
_refine.ls_number_reflns_R_free  734
_refine.ls_number_parameters    ?
_refine.ls_number_restraints    ?
_refine.occupancy_min           ?

```

|                                              |                      |
|----------------------------------------------|----------------------|
| _refine.occupancy_max                        | ?                    |
| _refine.correlation_coeff_Fo_to_Fc           | 0.954                |
| _refine.correlation_coeff_Fo_to_Fc_free      | 0.940                |
| _refine.B_iso_mean                           | 44.140               |
| _refine.aniso_B[1][1]                        | 3.33                 |
| _refine.aniso_B[2][2]                        | 1.38                 |
| _refine.aniso_B[3][3]                        | -4.71                |
| _refine.aniso_B[1][2]                        | -0.00                |
| _refine.aniso_B[1][3]                        | -0.00                |
| _refine.aniso_B[2][3]                        | 0.00                 |
| _refine.solvent_model_details                | MASK                 |
| _refine.solvent_model_param_ksol             | ?                    |
| _refine.solvent_model_param_bsol             | ?                    |
| _refine.pdbx_solvent_vdw_probe_radii         | 1.20                 |
| _refine.pdbx_solvent_ion_probe_radii         | 0.80                 |
| _refine.pdbx_solvent_shrinkage_radii         | 0.80                 |
| _refine.pdbx_ls_cross_valid_method           | THROUGHOUT           |
| _refine.details                              | ?                    |
| _refine.pdbx_starting_model                  | ?                    |
| _refine.pdbx_method_to_determine_struct      | SAD                  |
| _refine.pdbx_isotropic_thermal_model         | ?                    |
| _refine.pdbx_stereochemistry_target_values   | 'MAXIMUM LIKELIHOOD' |
| _refine.pdbx_stereochem_target_val_spec_case | ?                    |
| _refine.pdbx_R_Free_selection_details        | RANDOM               |
| _refine.pdbx_overall_ESU_R                   | 0.149                |
| _refine.pdbx_overall_ESU_R_Free              | 0.144                |
| _refine.overall_SU_ML                        | 0.130                |
| _refine.pdbx_overall_phase_error             | ?                    |
| _refine.overall_SU_B                         | 4.224                |
| _refine.overall_SU_R_Cruickshank_DPI         | ?                    |
| _refine.ls_redundancy_reflns_obs             | ?                    |
| _refine.B_iso_min                            | ?                    |
| _refine.B_iso_max                            | ?                    |
| _refine.overall_SU_R_free                    | ?                    |
| _refine.ls_wR_factor_R_free                  | ?                    |
| _refine.ls_wR_factor_R_work                  | ?                    |
| _refine.overall_FOM_free_R_set               | ?                    |

```

_refine.overall_FOM_work_R_set      ?
_refine.pdbx_refine_id              'X-RAY DIFFRACTION'
#
loop_
_refine_ls_restr.type
_refine_ls_restr.dev_ideal
_refine_ls_restr.dev_ideal_target
_refine_ls_restr.weight
_refine_ls_restr.number
_refine_ls_restr.pdbx_restraint_function
_refine_ls_restr.pdbx_refine_id
r_bond_refined_d      0.011 0.013 ? 554 ? 'X-RAY DIFFRACTION'
r_angle_refined_deg  1.652 1.578 ? 833 ? 'X-RAY DIFFRACTION'
r_chiral_restr       0.125 0.200 ? 66 ? 'X-RAY DIFFRACTION'
r_gen_planes_refined 0.023 0.020 ? 260 ? 'X-RAY DIFFRACTION'
#
_refine_ls_shell.pdbx_total_number_of_bins_used 20
_refine_ls_shell.d_res_high                     1.70
_refine_ls_shell.d_res_low                     1.745
_refine_ls_shell.number_reflns_R_work          338
_refine_ls_shell.R_factor_R_work              0.336
_refine_ls_shell.percent_reflns_obs           57.01
_refine_ls_shell.R_factor_R_free              0.336
_refine_ls_shell.R_factor_R_free_error        ?
_refine_ls_shell.percent_reflns_R_free        ?
_refine_ls_shell.number_reflns_R_free         36
_refine_ls_shell.number_reflns_all            ?
_refine_ls_shell.R_factor_all                 ?
_refine_ls_shell.number_reflns_obs            ?
_refine_ls_shell.redundancy_reflns_obs        ?
_refine_ls_shell.pdbx_refine_id              'X-RAY DIFFRACTION'
#
_database_PDB_matrix.entry_id                 4HQI
_database_PDB_matrix.origx[1][1]             1.000000
_database_PDB_matrix.origx[1][2]             0.000000
_database_PDB_matrix.origx[1][3]             0.000000
_database_PDB_matrix.origx[2][1]             0.000000

```

```

_database_PDB_matrix.origx[2][2]      1.000000
_database_PDB_matrix.origx[2][3]      0.000000
_database_PDB_matrix.origx[3][1]      0.000000
_database_PDB_matrix.origx[3][2]      0.000000
_database_PDB_matrix.origx[3][3]      1.000000
_database_PDB_matrix.origx_vector[1]  0.000000
_database_PDB_matrix.origx_vector[2]  0.000000
_database_PDB_matrix.origx_vector[3]  0.000000
#
_exptl.entry_id          4HQI
_exptl.method            'X-RAY DIFFRACTION'
_exptl.crystals_number   2
#
loop_
_ndb_struct_conf_na.entry_id
_ndb_struct_conf_na.feature
4HQI 'b-form double helix'
4HQI 'mismatched base pair'
#
loop_
_ndb_struct_na_base_pair.model_number
_ndb_struct_na_base_pair.i_label_asym_id
_ndb_struct_na_base_pair.i_label_comp_id
_ndb_struct_na_base_pair.i_label_seq_id
_ndb_struct_na_base_pair.i_symmetry
_ndb_struct_na_base_pair.j_label_asym_id
_ndb_struct_na_base_pair.j_label_comp_id
_ndb_struct_na_base_pair.j_label_seq_id
_ndb_struct_na_base_pair.j_symmetry
_ndb_struct_na_base_pair.shear
_ndb_struct_na_base_pair.stretch
_ndb_struct_na_base_pair.stagger
_ndb_struct_na_base_pair.buckle
_ndb_struct_na_base_pair.opening
_ndb_struct_na_base_pair.pair_number
_ndb_struct_na_base_pair.pair_name
_ndb_struct_na_base_pair.i_auth_asym_id

```

```

_ndb_struct_na_base_pair.i_auth_seq_id
_ndb_struct_na_base_pair.i_PDB_ins_code
_ndb_struct_na_base_pair.j_auth_asym_id
_ndb_struct_na_base_pair.j_auth_seq_id
_ndb_struct_na_base_pair.j_PDB_ins_code
_ndb_struct_na_base_pair.hbond_type_28
_ndb_struct_na_base_pair.hbond_type_12
1 A DG 2 1_555 B DC 11 1_555 -0.125 -0.253 -0.220 -11.324 -1.868 1 A_DG2:DC23_B A 2 ? B 23 ? 19 1
1 A DC 3 1_555 B DG 10 1_555 0.199 -0.225 -0.317 2.151 -1.099 2 A_DC3:DG22_B A 3 ? B 22 ? 19 1
1 A DA 5 1_555 B DT 8 1_555 -0.236 -0.008 -0.460 -12.406 1.251 3 A_DA5:DT20_B A 5 ? B 20 ? 20 1
1 A DA 6 1_555 B DT 7 1_555 -0.009 -0.142 -0.125 -5.111 0.172 4 A_DA6:DT19_B A 6 ? B 19 ? 20 1
1 A DT 7 1_555 B DA 6 1_555 0.132 -0.121 -0.126 2.516 1.351 5 A_DT7:DA18_B A 7 ? B 18 ? 20 1
1 A DT 8 1_555 B DA 5 1_555 0.024 -0.181 -0.510 8.065 4.832 6 A_DT8:DA17_B A 8 ? B 17 ? 20 1
1 A DG 10 1_555 B DC 3 1_555 -0.259 -0.158 -0.143 -0.234 0.472 7 A_DG10:DC15_B A 10 ? B 15 ? 19 1
1 A DC 11 1_555 B DG 2 1_555 0.194 -0.224 -0.063 10.713 -1.590 8 A_DC11:DG14_B A 11 ? B 14 ? 19 1
#
loop_
_ndb_struct_na_base_pair_step.model_number
_ndb_struct_na_base_pair_step.i_label_asym_id_1
_ndb_struct_na_base_pair_step.i_label_comp_id_1
_ndb_struct_na_base_pair_step.i_label_seq_id_1
_ndb_struct_na_base_pair_step.i_symmetry_1
_ndb_struct_na_base_pair_step.j_label_asym_id_1
_ndb_struct_na_base_pair_step.j_label_comp_id_1
_ndb_struct_na_base_pair_step.j_label_seq_id_1
_ndb_struct_na_base_pair_step.j_symmetry_1
_ndb_struct_na_base_pair_step.i_label_asym_id_2
_ndb_struct_na_base_pair_step.i_label_comp_id_2
_ndb_struct_na_base_pair_step.i_label_seq_id_2
_ndb_struct_na_base_pair_step.i_symmetry_2
_ndb_struct_na_base_pair_step.j_label_asym_id_2
_ndb_struct_na_base_pair_step.j_label_comp_id_2
_ndb_struct_na_base_pair_step.j_label_seq_id_2
_ndb_struct_na_base_pair_step.j_symmetry_2
_ndb_struct_na_base_pair_step.shift
_ndb_struct_na_base_pair_step.slide
_ndb_struct_na_base_pair_step.rise

```



```

_ ndb_struct_na_base_pair_step.tilt
_ ndb_struct_na_base_pair_step.roll
_ ndb_struct_na_base_pair_step.twist
_ ndb_struct_na_base_pair_step.x_displacement
_ ndb_struct_na_base_pair_step.y_displacement
_ ndb_struct_na_base_pair_step.helical_rise
_ ndb_struct_na_base_pair_step.inclination
_ ndb_struct_na_base_pair_step.tip
_ ndb_struct_na_base_pair_step.helical_twist
_ ndb_struct_na_base_pair_step.step_number
_ ndb_struct_na_base_pair_step.step_name
_ ndb_struct_na_base_pair_step.i_auth_asym_id_1
_ ndb_struct_na_base_pair_step.i_auth_seq_id_1
_ ndb_struct_na_base_pair_step.i_PDB_ins_code_1
_ ndb_struct_na_base_pair_step.j_auth_asym_id_1
_ ndb_struct_na_base_pair_step.j_auth_seq_id_1
_ ndb_struct_na_base_pair_step.j_PDB_ins_code_1
_ ndb_struct_na_base_pair_step.i_auth_asym_id_2
_ ndb_struct_na_base_pair_step.i_auth_seq_id_2
_ ndb_struct_na_base_pair_step.i_PDB_ins_code_2
_ ndb_struct_na_base_pair_step.j_auth_asym_id_2
_ ndb_struct_na_base_pair_step.j_auth_seq_id_2
_ ndb_struct_na_base_pair_step.j_PDB_ins_code_2
1 A DG 2 1_555 B DC 11 1_555 A DC 3 1_555 B DG 10 1_555 0.825 -0.036 3.016 -1.267 -2.600 30.408
0.405 -1.796 2.973 -4.943 2.408 30.542 1
AA_DG2DC3:DG22DC23_BB A 2 ? B 23 ? A 3 ? B 22 ?
1 A DA 5 1_555 B DT 8 1_555 A DA 6 1_555 B DT 7 1_555 -0.057 -0.095 3.259 -2.570 8.650 26.842 -
2.189 -0.476 3.072 18.000 5.348 28.292 2
AA_DA5DA6:DT19DT20_BB A 5 ? B 20 ? A 6 ? B 19 ?
1 A DA 6 1_555 B DT 7 1_555 A DT 7 1_555 B DA 6 1_555 -0.148 -0.601 3.135 0.082 6.206 27.711 -
2.567 0.320 2.933 12.755 -0.169 28.384 3
AA_DA6DT7:DA18DT19_BB A 6 ? B 19 ? A 7 ? B 18 ?
1 A DT 7 1_555 B DA 6 1_555 A DT 8 1_555 B DA 5 1_555 1.209 0.289 3.235 6.047 7.993 32.969 -
0.800 -1.070 3.374 13.696 -10.360 34.418 4
AA_DT7DT8:DA17DA18_BB A 7 ? B 18 ? A 8 ? B 17 ?
1 A DG 10 1_555 B DC 3 1_555 A DC 11 1_555 B DG 2 1_555 -0.894 0.014 3.141 0.568 -2.918 30.844
0.565 1.778 3.110 -5.470 -1.064 30.984 5

```

```

AA_DG10DC11:DG14DC15_BB A 10 ? B 15 ? A 11 ? B 14 ?
#
loop_
  _software.name
  _software.classification
  _software.version
  _software.citation_id
  _software.pdbx_ordinal
MD-2 'data collection' 'diffractometer software from EMBL (with LS-CAT developed extensions)' ? 1
PHENIX 'model building' . ? 2
REFMAC refinement 5.7.0029 ? 3
#
_entry.id 4HQI
#
_pdbx_unobs_or_zero_occ_residues.id 1
_pdbx_unobs_or_zero_occ_residues.polymer_flag Y
_pdbx_unobs_or_zero_occ_residues.occupancy_flag 1
_pdbx_unobs_or_zero_occ_residues.PDB_model_num 1
_pdbx_unobs_or_zero_occ_residues.auth_asym_id A
_pdbx_unobs_or_zero_occ_residues.auth_comp_id DC
_pdbx_unobs_or_zero_occ_residues.auth_seq_id 1
_pdbx_unobs_or_zero_occ_residues.PDB_ins_code ?
#
loop_
  _pdbx_unobs_or_zero_occ_atoms.id
  _pdbx_unobs_or_zero_occ_atoms.polymer_flag
  _pdbx_unobs_or_zero_occ_atoms.occupancy_flag
  _pdbx_unobs_or_zero_occ_atoms.PDB_model_num
  _pdbx_unobs_or_zero_occ_atoms.auth_asym_id
  _pdbx_unobs_or_zero_occ_atoms.auth_comp_id
  _pdbx_unobs_or_zero_occ_atoms.auth_seq_id
  _pdbx_unobs_or_zero_occ_atoms.PDB_ins_code
  _pdbx_unobs_or_zero_occ_atoms.auth_atom_id
  _pdbx_unobs_or_zero_occ_atoms.label_alt_id
1 Y 1 1 B DC 13 ? 'O5' ?
2 Y 1 1 B DC 13 ? 'C5' ?
3 Y 1 1 B DC 13 ? 'C4' ?

```

```

4 Y 1 1 B DC 13 ? 'O4'' ?
5 Y 1 1 B DC 13 ? 'C3'' ?
6 Y 1 1 B DC 13 ? 'C2'' ?
7 Y 1 1 B DC 13 ? 'C1'' ?
8 Y 1 1 B DC 13 ? N1 ?
9 Y 1 1 B DC 13 ? C2 ?
10 Y 1 1 B DC 13 ? O2 ?
11 Y 1 1 B DC 13 ? N3 ?
12 Y 1 1 B DC 13 ? C4 ?
13 Y 1 1 B DC 13 ? N4 ?
14 Y 1 1 B DC 13 ? C5 ?
15 Y 1 1 B DC 13 ? C6 ?
#
loop_
_struct_site.id
_struct_site.details
_struct_site.pdbx_evidence_code
AC1 'BINDING SITE FOR RESIDUE SPM A 101' SOFTWARE
AC2 'BINDING SITE FOR RESIDUE SR A 102' SOFTWARE
#
_atom_sites.entry_id 4HQI
_atom_sites.Cartn_transform_axes ?
_atom_sites.fract_transf_matrix[1][1] 0.037902
_atom_sites.fract_transf_matrix[1][2] 0.000000
_atom_sites.fract_transf_matrix[1][3] 0.000000
_atom_sites.fract_transf_matrix[2][1] -0.000000
_atom_sites.fract_transf_matrix[2][2] 0.027193
_atom_sites.fract_transf_matrix[2][3] 0.000000
_atom_sites.fract_transf_matrix[3][1] 0.000000
_atom_sites.fract_transf_matrix[3][2] -0.000000
_atom_sites.fract_transf_matrix[3][3] 0.012878
_atom_sites.fract_transf_vector[1] 0.00000
_atom_sites.fract_transf_vector[2] 0.00000
_atom_sites.fract_transf_vector[3] 0.00000
#
_citation.id primary
_citation.title

```

;Recognition of O6-Benzyl-2'-deoxyguanosine by a Perimidinone-Derived Synthetic Nucleoside: A Unique Interstrand Stacking Interaction

```

;
_citation.journal_abbrev      'To be Published'
_citation.journal_volume     ?
_citation.page_first         ?
_citation.page_last          ?
_citation.year                ?
_citation.journal_id_ASTM    ?
_citation.country             ?
_citation.journal_id_ISSN    ?
_citation.journal_id_CSD     0353
_citation.book_publisher      ?
_citation.pdbx_database_id_PubMed ?
_citation.pdbx_database_id_DOI ?
#
loop_
_citation_author.citation_id
_citation_author.name
_citation_author.ordinal
primary 'Kowal, E.A.' 1
primary 'Lad, R.'      2
primary 'Pallan, P.S.' 3
primary 'Muffly, E.'   4
primary 'Wawrzak, Z.'  5
primary 'Egli, M.'     6
primary 'Sturla, S.J.' 7
primary 'Stone, M.P.'  8
#
_computing.entry_id          4HQI
_computing.pdbx_data_reduction_ii HKL2000
_computing.pdbx_data_reduction_ds HKL2000
_computing.data_collection   'MD-2 diffractometer software from EMBL (with LS-CAT
developed extensions)'
_computing.structure_solution PHENIX
_computing.structure_refinement 'REFMAC 5.7.0029'
_computing.pdbx_structure_refinement_method ?

```

```

#
_database.entry_id    4HQI
_database.code_CSD    ?
#
loop_
_database_2.database_id
_database_2.database_code
PDB    4HQI
NDB    NA2104
RCSB   RCSB075793
#
loop_
_entity.id
_entity.type
_entity.src_method
_entity.pdbx_description
_entity.formula_weight
_entity.pdbx_number_of_molecules
_entity.details
1 polymer      syn 'Short modified nucleic acids' 3826.640 2  ?
2 non-polymer syn SPERMINE                        202.342  1  ?
3 non-polymer syn 'STRONTIUM ION'                 87.620   1  ?
4 water        nat water                          18.015   49 ?
#
loop_
_entity_poly_seq.entity_id
_entity_poly_seq.num
_entity_poly_seq.mon_id
_entity_poly_seq.hetero
1 1  DC  n
1 2  DG  n
1 3  DC  n
1 4  BZG n
1 5  DA  n
1 6  DA  n
1 7  DT  n
1 8  DT  n

```

```

1 9  D3N n
1 10 DG  n
1 11 DC  n
1 12 DG  n
#
_entity_poly.entity_id      1
_entity_poly.type           polydeoxyribonucleotide
_entity_poly.nstd_linkage   no
_entity_poly.nstd_monomer   yes
_entity_poly.pdbx_seq_one_letter_code (DC) (DG) (DC) (BZG) (DA) (DA) (DT) (DT) (D3N) (DG) (DC) (DG)
_entity_poly.pdbx_seq_one_letter_code_can CGCNAATTXGCG
#
loop_
_pdbx_poly_seq_scheme.asym_id
_pdbx_poly_seq_scheme.entity_id
_pdbx_poly_seq_scheme.seq_id
_pdbx_poly_seq_scheme.mon_id
_pdbx_poly_seq_scheme.ndb_seq_num
_pdbx_poly_seq_scheme.pdb_seq_num
_pdbx_poly_seq_scheme.auth_seq_num
_pdbx_poly_seq_scheme.pdb_mon_id
_pdbx_poly_seq_scheme.auth_mon_id
_pdbx_poly_seq_scheme.pdb_strand_id
_pdbx_poly_seq_scheme.pdb_ins_code
_pdbx_poly_seq_scheme.hetero
A 1 1  DC  1  1  ?  ?  ?  A  .  n
A 1 2  DG  2  2  2  DG  DG  A  .  n
A 1 3  DC  3  3  3  DC  DC  A  .  n
A 1 4  BZG 4  4  4  BZG BZG A  .  n
A 1 5  DA  5  5  5  DA  DA  A  .  n
A 1 6  DA  6  6  6  DA  DA  A  .  n
A 1 7  DT  7  7  7  DT  DT  A  .  n
A 1 8  DT  8  8  8  DT  DT  A  .  n
A 1 9  D3N 9  9  9  D3N D3N A  .  n
A 1 10 DG  10 10 10 DG  DG  A  .  n
A 1 11 DC  11 11 11 DC  DC  A  .  n
A 1 12 DG  12 12 12 DG  DG  A  .  n

```

```

B 1 1 DC 1 13 13 DC DC B . n
B 1 2 DG 2 14 14 DG DG B . n
B 1 3 DC 3 15 15 DC DC B . n
B 1 4 BZG 4 16 16 BZG BZG B . n
B 1 5 DA 5 17 17 DA DA B . n
B 1 6 DA 6 18 18 DA DA B . n
B 1 7 DT 7 19 19 DT DT B . n
B 1 8 DT 8 20 20 DT DT B . n
B 1 9 D3N 9 21 21 D3N D3N B . n
B 1 10 DG 10 22 22 DG DG B . n
B 1 11 DC 11 23 23 DC DC B . n
B 1 12 DG 12 24 24 DG DG B . n
#
loop_
_pdbx_nonpoly_scheme.asym_id
_pdbx_nonpoly_scheme.entity_id
_pdbx_nonpoly_scheme.mon_id
_pdbx_nonpoly_scheme.ndb_seq_num
_pdbx_nonpoly_scheme.pdb_seq_num
_pdbx_nonpoly_scheme.auth_seq_num
_pdbx_nonpoly_scheme.pdb_mon_id
_pdbx_nonpoly_scheme.auth_mon_id
_pdbx_nonpoly_scheme.pdb_strand_id
_pdbx_nonpoly_scheme.pdb_ins_code
C 2 SPM 1 101 330 SPM SPM A .
D 3 SR 1 102 1 SR SR A .
E 4 HOH 1 201 4 HOH HOH A .
E 4 HOH 2 202 7 HOH HOH A .
E 4 HOH 3 203 11 HOH HOH A .
E 4 HOH 4 204 12 HOH HOH A .
E 4 HOH 5 205 13 HOH HOH A .
E 4 HOH 6 206 19 HOH HOH A .
E 4 HOH 7 207 20 HOH HOH A .
E 4 HOH 8 208 21 HOH HOH A .
E 4 HOH 9 209 22 HOH HOH A .
E 4 HOH 10 210 23 HOH HOH A .
E 4 HOH 11 211 24 HOH HOH A .

```

E 4 HOH 12 212 25 HOH HOH A .  
E 4 HOH 13 213 26 HOH HOH A .  
E 4 HOH 14 214 28 HOH HOH A .  
E 4 HOH 15 215 30 HOH HOH A .  
E 4 HOH 16 216 31 HOH HOH A .  
E 4 HOH 17 217 32 HOH HOH A .  
E 4 HOH 18 218 33 HOH HOH A .  
E 4 HOH 19 219 34 HOH HOH A .  
E 4 HOH 20 220 35 HOH HOH A .  
E 4 HOH 21 221 37 HOH HOH A .  
E 4 HOH 22 222 38 HOH HOH A .  
E 4 HOH 23 223 39 HOH HOH A .  
E 4 HOH 24 224 41 HOH HOH A .  
E 4 HOH 25 225 44 HOH HOH A .  
E 4 HOH 26 226 48 HOH HOH A .  
E 4 HOH 27 227 49 HOH HOH A .  
E 4 HOH 28 228 50 HOH HOH A .  
F 4 HOH 1 101 2 HOH HOH B .  
F 4 HOH 2 102 3 HOH HOH B .  
F 4 HOH 3 103 5 HOH HOH B .  
F 4 HOH 4 104 6 HOH HOH B .  
F 4 HOH 5 105 8 HOH HOH B .  
F 4 HOH 6 106 9 HOH HOH B .  
F 4 HOH 7 107 10 HOH HOH B .  
F 4 HOH 8 108 14 HOH HOH B .  
F 4 HOH 9 109 15 HOH HOH B .  
F 4 HOH 10 110 16 HOH HOH B .  
F 4 HOH 11 111 17 HOH HOH B .  
F 4 HOH 12 112 18 HOH HOH B .  
F 4 HOH 13 113 27 HOH HOH B .  
F 4 HOH 14 114 29 HOH HOH B .  
F 4 HOH 15 115 36 HOH HOH B .  
F 4 HOH 16 116 40 HOH HOH B .  
F 4 HOH 17 117 42 HOH HOH B .  
F 4 HOH 18 118 43 HOH HOH B .  
F 4 HOH 19 119 45 HOH HOH B .  
F 4 HOH 20 120 46 HOH HOH B .



```

F 4 HOH 21 121 47 HOH HOH B .
#
_pdbx_entity_src_syn.entity_id          1
_pdbx_entity_src_syn.organism_scientific 'SYNTHETIC CONSTRUCT'
_pdbx_entity_src_syn.organism_common_name ?
_pdbx_entity_src_syn.ncbi_taxonomy_id   32630
_pdbx_entity_src_syn.details            'Chemically synthesized modified oligonucleotides'
#
_refine_hist.pdbx_refine_id              'X-RAY DIFFRACTION'
_refine_hist.cycle_id                    LAST
_refine_hist.pdbx_number_atoms_protein   0
_refine_hist.pdbx_number_atoms_nucleic_acid 481
_refine_hist.pdbx_number_atoms_ligand    15
_refine_hist.number_atoms_solvent        49
_refine_hist.number_atoms_total          545
_refine_hist.d_res_high                   1.70
_refine_hist.d_res_low                    20.67
#
_struct.entry_id                          4HQI
_struct.title
;Structure of O6-Benzyl-2'-deoxyguanosine opposite perimidinone-derived synthetic nucleoside in DNA
duplex
;
_struct.pdbx_descriptor                    '5'-D(*CP*GP*CP*(BZG)P*AP*AP*TP*TP*(D3N)P*GP*CP*G)-3''
_struct.pdbx_model_details                 ?
_struct.pdbx_CASP_flag                     ?
_struct.pdbx_model_type_details            ?
#
loop_
_struct_asym.id
_struct_asym.pdbx_blank_PDB_chainid_flag
_struct_asym.pdbx_modified
_struct_asym.entity_id
_struct_asym.details
A N N 1 ?
B N N 1 ?
C N N 2 ?

```

```
D N N 3 ?
E N N 4 ?
F N N 4 ?
#
loop_
  _struct_conn.id
  _struct_conn.conn_type_id
  _struct_conn.pdbx_PDB_id
  _struct_conn.ptnr1_label_asym_id
  _struct_conn.ptnr1_label_comp_id
  _struct_conn.ptnr1_label_seq_id
  _struct_conn.ptnr1_label_atom_id
  _struct_conn.pdbx_ptnr1_label_alt_id
  _struct_conn.pdbx_ptnr1_PDB_ins_code
  _struct_conn.pdbx_ptnr1_standard_comp_id
  _struct_conn.ptnr1_symmetry
  _struct_conn.ptnr2_label_asym_id
  _struct_conn.ptnr2_label_comp_id
  _struct_conn.ptnr2_label_seq_id
  _struct_conn.ptnr2_label_atom_id
  _struct_conn.pdbx_ptnr2_label_alt_id
  _struct_conn.pdbx_ptnr2_PDB_ins_code
  _struct_conn.ptnr1_auth_asym_id
  _struct_conn.ptnr1_auth_comp_id
  _struct_conn.ptnr1_auth_seq_id
  _struct_conn.ptnr2_auth_asym_id
  _struct_conn.ptnr2_auth_comp_id
  _struct_conn.ptnr2_auth_seq_id
  _struct_conn.ptnr2_symmetry
  _struct_conn.pdbx_ptnr3_label_atom_id
  _struct_conn.pdbx_ptnr3_label_seq_id
  _struct_conn.pdbx_ptnr3_label_comp_id
  _struct_conn.pdbx_ptnr3_label_asym_id
  _struct_conn.pdbx_ptnr3_label_alt_id
  _struct_conn.pdbx_ptnr3_PDB_ins_code
  _struct_conn.details
  _struct_conn.pdbx_dist_value
```

```

_struct_conn.pdbx_value_order
metalcl1 metalc ? A DG 12 O6    ? ? ? 1_555 D SR . SR ? ? A DG 12 A SR 102 1_555 ? ? ? ? ? ? ?
2.690 ?
covale1  covale ? A DT 8  'O3'' ? ? ? 1_555 A D3N 9  P  ? ? A DT 8  A D3N 9  1_555 ? ? ? ? ? ? ?
1.578 ?
covale2  covale ? B DT 8  'O3'' ? ? ? 1_555 B D3N 9  P  ? ? B DT 20 B D3N 21 1_555 ? ? ? ? ? ? ?
1.591 ?
covale3  covale ? A DC 3  'O3'' ? ? ? 1_555 A BZG 4  P  ? ? A DC 3  A BZG 4  1_555 ? ? ? ? ? ? ?
1.586 ?
covale4  covale ? B DC 3  'O3'' ? ? ? 1_555 B BZG 4  P  ? ? B DC 15 B BZG 16 1_555 ? ? ? ? ? ? ?
1.595 ?
hydrog1  hydrog ? A DG 2  N1    ? ? ? 1_555 B DC 11 N3 ? ? A DG 2  B DC 23 1_555 ? ? ? ? ? ?
WATSON-CRICK ?      ?
hydrog2  hydrog ? A DG 2  N2    ? ? ? 1_555 B DC 11 O2 ? ? A DG 2  B DC 23 1_555 ? ? ? ? ? ?
WATSON-CRICK ?      ?
hydrog3  hydrog ? A DG 2  O6    ? ? ? 1_555 B DC 11 N4 ? ? A DG 2  B DC 23 1_555 ? ? ? ? ? ?
WATSON-CRICK ?      ?
hydrog4  hydrog ? A DC 3  N3    ? ? ? 1_555 B DG 10 N1 ? ? A DC 3  B DG 22 1_555 ? ? ? ? ? ?
WATSON-CRICK ?      ?
hydrog5  hydrog ? A DC 3  N4    ? ? ? 1_555 B DG 10 O6 ? ? A DC 3  B DG 22 1_555 ? ? ? ? ? ?
WATSON-CRICK ?      ?
hydrog6  hydrog ? A DC 3  O2    ? ? ? 1_555 B DG 10 N2 ? ? A DC 3  B DG 22 1_555 ? ? ? ? ? ?
WATSON-CRICK ?      ?
hydrog7  hydrog ? A DA 5  N1    ? ? ? 1_555 B DT 8  N3 ? ? A DA 5  B DT 20 1_555 ? ? ? ? ? ?
WATSON-CRICK ?      ?
hydrog8  hydrog ? A DA 5  N6    ? ? ? 1_555 B DT 8  O4 ? ? A DA 5  B DT 20 1_555 ? ? ? ? ? ?
WATSON-CRICK ?      ?
hydrog9  hydrog ? A DA 6  N1    ? ? ? 1_555 B DT 7  N3 ? ? A DA 6  B DT 19 1_555 ? ? ? ? ? ?
WATSON-CRICK ?      ?
hydrog10 hydrog ? A DA 6  N6    ? ? ? 1_555 B DT 7  O4 ? ? A DA 6  B DT 19 1_555 ? ? ? ? ? ?
WATSON-CRICK ?      ?
hydrog11 hydrog ? A DT 7  N3    ? ? ? 1_555 B DA 6  N1 ? ? A DT 7  B DA 18 1_555 ? ? ? ? ? ?
WATSON-CRICK ?      ?
hydrog12 hydrog ? A DT 7  O4    ? ? ? 1_555 B DA 6  N6 ? ? A DT 7  B DA 18 1_555 ? ? ? ? ? ?
WATSON-CRICK ?      ?
hydrog13 hydrog ? A DT 8  N3    ? ? ? 1_555 B DA 5  N1 ? ? A DT 8  B DA 17 1_555 ? ? ? ? ? ?
WATSON-CRICK ?      ?

```

```

hydrog14 hydrog ? A DT 8 O4 ? ? ? 1_555 B DA 5 N6 ? ? A DT 8 B DA 17 1_555 ? ? ? ? ? ?
WATSON-CRICK ? ?
hydrog15 hydrog ? A DG 10 N1 ? ? ? 1_555 B DC 3 N3 ? ? A DG 10 B DC 15 1_555 ? ? ? ? ? ?
WATSON-CRICK ? ?
hydrog16 hydrog ? A DG 10 N2 ? ? ? 1_555 B DC 3 O2 ? ? A DG 10 B DC 15 1_555 ? ? ? ? ? ?
WATSON-CRICK ? ?
hydrog17 hydrog ? A DG 10 O6 ? ? ? 1_555 B DC 3 N4 ? ? A DG 10 B DC 15 1_555 ? ? ? ? ? ?
WATSON-CRICK ? ?
hydrog18 hydrog ? A DC 11 N3 ? ? ? 1_555 B DG 2 N1 ? ? A DC 11 B DG 14 1_555 ? ? ? ? ? ?
WATSON-CRICK ? ?
hydrog19 hydrog ? A DC 11 N4 ? ? ? 1_555 B DG 2 O6 ? ? A DC 11 B DG 14 1_555 ? ? ? ? ? ?
WATSON-CRICK ? ?
hydrog20 hydrog ? A DC 11 O2 ? ? ? 1_555 B DG 2 N2 ? ? A DC 11 B DG 14 1_555 ? ? ? ? ? ?
WATSON-CRICK ? ?
#
loop_
_struct_conn_type.id
_struct_conn_type.criteria
_struct_conn_type.reference
covale ?
?
metalc ?
?
hydrog 'For hydrogen bonding between nucleic acid bases, donor to acceptor distance of 2.2 -3.5
Angstroms was used.' ?
#
loop_
_struct_site_gen.id
_struct_site_gen.site_id
_struct_site_gen.pdbx_num_res
_struct_site_gen.label_comp_id
_struct_site_gen.label_asym_id
_struct_site_gen.label_seq_id
_struct_site_gen.pdbx_auth_ins_code
_struct_site_gen.auth_comp_id
_struct_site_gen.auth_asym_id
_struct_site_gen.auth_seq_id

```

```

_struct_site_gen.label_atom_id
_struct_site_gen.label_alt_id
_struct_site_gen.symmetry
_struct_site_gen.details
1 AC1 6 DG A 2 ? DG A 2 . . 1_555 ?
2 AC1 6 D3N A 9 ? D3N A 9 . . 2_555 ?
3 AC1 6 D3N A 9 ? D3N A 9 . . 3_645 ?
4 AC1 6 DG A 10 ? DG A 10 . . 2_555 ?
5 AC1 6 DG B 2 ? DG B 14 . . 2_555 ?
6 AC1 6 DG B 10 ? DG B 22 . . 1_555 ?
7 AC2 1 DG A 12 ? DG A 12 . . 1_555 ?
#
loop_
_diffn_radiation_wavelength.id
_diffn_radiation_wavelength.wavelength
_diffn_radiation_wavelength.wt
1 1.60499 1.0
2 0.97857 1.0
#
loop_
_atom_type.symbol
P
O
C
N
SR
#
loop_
_chem_comp.id
_chem_comp.type
_chem_comp.mon_nstd_flag
_chem_comp.name
_chem_comp.pdbx_synonyms
_chem_comp.formula
_chem_comp.formula_weight
DG 'DNA linking' y '2'-DEOXYGUANOSINE-5'-MONOPHOSPHATE'
?
```

```

'C10 H14 N5 O7 P' 347.224
DC 'DNA linking' y '2'-DEOXYCYTIDINE-5'-MONOPHOSPHATE'
?
'C9 H14 N3 O7 P' 307.199
BZG 'DNA linking' . 6-(BENZYLOXY)-9-(2-DEOXY-5-O-PHOSPHONO-BETA-D-ERYTHRO-PENTOFURANOSYL)-9H-PURIN-2-AMINE 'O6-BENZYL-2'-DEOXYGUANOSINE-5'-MONOPHOSPHATE'
'C17 H20 N5 O7 P' 437.348
DA 'DNA linking' y '2'-DEOXYADENOSINE-5'-MONOPHOSPHATE'
?
'C10 H14 N5 O6 P' 331.224
DT 'DNA linking' y 'THYMIDINE-5'-MONOPHOSPHATE'
?
'C10 H15 N2 O8 P' 322.211
D3N 'DNA linking' . 1-(2-DEOXY-5-O-PHOSPHONO-BETA-D-ERYTHRO-PENTOFURANOSYL)-1H-PERIMIDIN-2(3H)-ONE
?
'C16 H17 N2 O7 P' 380.293
SPM NON-POLYMER . SPERMINE
?
'C10 H26 N4' 202.342
SR NON-POLYMER . 'STRONTIUM ION'
?
'SR 2' 87.620
HOH NON-POLYMER . WATER
?
'H2 O' 18.015
#
loop_
_pdbx_validate_close_contact.id
_pdbx_validate_close_contact.PDB_model_num
_pdbx_validate_close_contact.auth_atom_id_1
_pdbx_validate_close_contact.auth_asym_id_1
_pdbx_validate_close_contact.auth_comp_id_1
_pdbx_validate_close_contact.auth_seq_id_1
_pdbx_validate_close_contact.PDB_ins_code_1
_pdbx_validate_close_contact.label_alt_id_1
_pdbx_validate_close_contact.auth_atom_id_2
_pdbx_validate_close_contact.auth_asym_id_2

```

```

_pdbx_validate_close_contact.auth_comp_id_2
_pdbx_validate_close_contact.auth_seq_id_2
_pdbx_validate_close_contact.PDB_ins_code_2
_pdbx_validate_close_contact.label_alt_id_2
_pdbx_validate_close_contact.dist
1 1 O A HOH 225 ? ? O A HOH 226 ? ? 2.09
2 1 O B HOH 103 ? ? O B HOH 104 ? ? 2.19
#
_pdbx_validate_rmsd_angle.id 1
_pdbx_validate_rmsd_angle.PDB_model_num 1
_pdbx_validate_rmsd_angle.auth_atom_id_1 'C1''
_pdbx_validate_rmsd_angle.auth_asym_id_1 A
_pdbx_validate_rmsd_angle.auth_comp_id_1 DC
_pdbx_validate_rmsd_angle.auth_seq_id_1 3
_pdbx_validate_rmsd_angle.PDB_ins_code_1 ?
_pdbx_validate_rmsd_angle.label_alt_id_1 ?
_pdbx_validate_rmsd_angle.auth_atom_id_2 'O4''
_pdbx_validate_rmsd_angle.auth_asym_id_2 A
_pdbx_validate_rmsd_angle.auth_comp_id_2 DC
_pdbx_validate_rmsd_angle.auth_seq_id_2 3
_pdbx_validate_rmsd_angle.PDB_ins_code_2 ?
_pdbx_validate_rmsd_angle.label_alt_id_2 ?
_pdbx_validate_rmsd_angle.auth_atom_id_3 'C4''
_pdbx_validate_rmsd_angle.auth_asym_id_3 A
_pdbx_validate_rmsd_angle.auth_comp_id_3 DC
_pdbx_validate_rmsd_angle.auth_seq_id_3 3
_pdbx_validate_rmsd_angle.PDB_ins_code_3 ?
_pdbx_validate_rmsd_angle.label_alt_id_3 ?
_pdbx_validate_rmsd_angle.angle_deviation -6.2
#
loop_
_pdbx_entity_nonpoly.entity_id
_pdbx_entity_nonpoly.name
_pdbx_entity_nonpoly.comp_id
2 SPERMINE SPM
3 'STRONTIUM ION' SR
4 water HOH

```

```

#
loop_
  _atom_site.group_PDB
  _atom_site.id
  _atom_site.type_symbol
  _atom_site.label_atom_id
  _atom_site.label_alt_id
  _atom_site.label_comp_id
  _atom_site.label_asym_id
  _atom_site.label_entity_id
  _atom_site.label_seq_id
  _atom_site.pdbx_PDB_ins_code
  _atom_site.Cartn_x
  _atom_site.Cartn_y
  _atom_site.Cartn_z
  _atom_site.occupancy
  _atom_site.B_iso_or_equiv
  _atom_site.Cartn_x_esd
  _atom_site.Cartn_y_esd
  _atom_site.Cartn_z_esd
  _atom_site.occupancy_esd
  _atom_site.B_iso_or_equiv_esd
  _atom_site.pdbx_formal_charge
  _atom_site.auth_seq_id
  _atom_site.auth_comp_id
  _atom_site.auth_asym_id
  _atom_site.auth_atom_id
  _atom_site.pdbx_PDB_model_num
ATOM 1 P P . DG A 1 2 ? 9.239 -10.993 30.734 0.60 64.21 ? ? ? ? ? ? 2 DG A P 1
ATOM 2 O OP1 . DG A 1 2 ? 9.072 -10.756 32.190 0.60 60.29 ? ? ? ? ? ? 2 DG A OP1 1
ATOM 3 O OP2 . DG A 1 2 ? 9.385 -12.395 30.228 0.60 53.30 ? ? ? ? ? ? 2 DG A OP2 1
ATOM 4 O 'O5'' . DG A 1 2 ? 8.014 -10.291 29.981 1.00 66.68 ? ? ? ? ? ? 2 DG A 'O5'' 1
ATOM 5 C 'C5'' . DG A 1 2 ? 6.825 -9.899 30.702 1.00 55.81 ? ? ? ? ? ? 2 DG A 'C5'' 1
ATOM 6 C 'C4'' . DG A 1 2 ? 5.949 -8.961 29.894 1.00 52.59 ? ? ? ? ? ? 2 DG A 'C4'' 1
ATOM 7 O 'O4'' . DG A 1 2 ? 6.194 -7.574 30.229 1.00 47.03 ? ? ? ? ? ? 2 DG A 'O4'' 1
ATOM 8 C 'C3'' . DG A 1 2 ? 6.021 -9.044 28.371 1.00 47.01 ? ? ? ? ? ? 2 DG A 'C3'' 1
ATOM 9 O 'O3'' . DG A 1 2 ? 4.664 -8.805 27.971 1.00 43.95 ? ? ? ? ? ? 2 DG A 'O3'' 1

```



|      |    |   |       |       |       |          |        |        |      |       |               |     |         |   |
|------|----|---|-------|-------|-------|----------|--------|--------|------|-------|---------------|-----|---------|---|
| ATOM | 10 | C | 'C2'' | . DG  | A 1 2 | ? 6.953  | -7.905 | 28.004 | 1.00 | 43.36 | ? ? ? ? ? ? 2 | DG  | A 'C2'' | 1 |
| ATOM | 11 | C | 'C1'' | . DG  | A 1 2 | ? 6.723  | -6.873 | 29.101 | 1.00 | 38.71 | ? ? ? ? ? ? 2 | DG  | A 'C1'' | 1 |
| ATOM | 12 | N | N9    | . DG  | A 1 2 | ? 7.941  | -6.215 | 29.539 | 1.00 | 38.13 | ? ? ? ? ? ? 2 | DG  | A N9    | 1 |
| ATOM | 13 | C | C8    | . DG  | A 1 2 | ? 9.159  | -6.806 | 29.783 | 1.00 | 40.71 | ? ? ? ? ? ? 2 | DG  | A C8    | 1 |
| ATOM | 14 | N | N7    | . DG  | A 1 2 | ? 10.037 | -5.980 | 30.285 | 1.00 | 37.92 | ? ? ? ? ? ? 2 | DG  | A N7    | 1 |
| ATOM | 15 | C | C5    | . DG  | A 1 2 | ? 9.326  | -4.799 | 30.471 | 1.00 | 34.44 | ? ? ? ? ? ? 2 | DG  | A C5    | 1 |
| ATOM | 16 | C | C6    | . DG  | A 1 2 | ? 9.751  | -3.550 | 30.963 | 1.00 | 33.16 | ? ? ? ? ? ? 2 | DG  | A C6    | 1 |
| ATOM | 17 | O | O6    | . DG  | A 1 2 | ? 10.873 | -3.233 | 31.386 | 1.00 | 39.27 | ? ? ? ? ? ? 2 | DG  | A O6    | 1 |
| ATOM | 18 | N | N1    | . DG  | A 1 2 | ? 8.717  | -2.611 | 30.947 | 1.00 | 31.66 | ? ? ? ? ? ? 2 | DG  | A N1    | 1 |
| ATOM | 19 | C | C2    | . DG  | A 1 2 | ? 7.432  | -2.858 | 30.522 | 1.00 | 26.82 | ? ? ? ? ? ? 2 | DG  | A C2    | 1 |
| ATOM | 20 | N | N2    | . DG  | A 1 2 | ? 6.580  | -1.803 | 30.529 | 1.00 | 29.37 | ? ? ? ? ? ? 2 | DG  | A N2    | 1 |
| ATOM | 21 | N | N3    | . DG  | A 1 2 | ? 7.035  | -4.016 | 30.020 | 1.00 | 32.27 | ? ? ? ? ? ? 2 | DG  | A N3    | 1 |
| ATOM | 22 | C | C4    | . DG  | A 1 2 | ? 8.029  | -4.933 | 30.021 | 1.00 | 32.15 | ? ? ? ? ? ? 2 | DG  | A C4    | 1 |
| ATOM | 23 | P | P     | . DC  | A 1 3 | ? 4.239  | -8.657 | 26.447 | 1.00 | 46.97 | ? ? ? ? ? ? 3 | DC  | A P     | 1 |
| ATOM | 24 | O | OP1   | . DC  | A 1 3 | ? 2.751  | -8.762 | 26.393 | 1.00 | 49.89 | ? ? ? ? ? ? 3 | DC  | A OP1   | 1 |
| ATOM | 25 | O | OP2   | . DC  | A 1 3 | ? 5.133  | -9.515 | 25.605 | 1.00 | 53.26 | ? ? ? ? ? ? 3 | DC  | A OP2   | 1 |
| ATOM | 26 | O | 'O5'' | . DC  | A 1 3 | ? 4.520  | -7.119 | 26.124 | 1.00 | 43.44 | ? ? ? ? ? ? 3 | DC  | A 'O5'' | 1 |
| ATOM | 27 | C | 'C5'' | . DC  | A 1 3 | ? 3.632  | -6.106 | 26.576 | 1.00 | 38.31 | ? ? ? ? ? ? 3 | DC  | A 'C5'' | 1 |
| ATOM | 28 | C | 'C4'' | . DC  | A 1 3 | ? 4.287  | -4.774 | 26.306 | 1.00 | 36.86 | ? ? ? ? ? ? 3 | DC  | A 'C4'' | 1 |
| ATOM | 29 | O | 'O4'' | . DC  | A 1 3 | ? 5.592  | -4.779 | 26.930 | 1.00 | 42.11 | ? ? ? ? ? ? 3 | DC  | A 'O4'' | 1 |
| ATOM | 30 | C | 'C3'' | . DC  | A 1 3 | ? 4.561  | -4.493 | 24.826 | 1.00 | 34.95 | ? ? ? ? ? ? 3 | DC  | A 'C3'' | 1 |
| ATOM | 31 | O | 'O3'' | . DC  | A 1 3 | ? 3.753  | -3.403 | 24.382 | 1.00 | 46.76 | ? ? ? ? ? ? 3 | DC  | A 'O3'' | 1 |
| ATOM | 32 | C | 'C2'' | . DC  | A 1 3 | ? 6.019  | -4.016 | 24.799 | 1.00 | 40.64 | ? ? ? ? ? ? 3 | DC  | A 'C2'' | 1 |
| ATOM | 33 | C | 'C1'' | . DC  | A 1 3 | ? 6.290  | -3.756 | 26.261 | 1.00 | 38.02 | ? ? ? ? ? ? 3 | DC  | A 'C1'' | 1 |
| ATOM | 34 | N | N1    | . DC  | A 1 3 | ? 7.686  | -3.832 | 26.664 | 1.00 | 41.53 | ? ? ? ? ? ? 3 | DC  | A N1    | 1 |
| ATOM | 35 | C | C2    | . DC  | A 1 3 | ? 8.245  | -2.738 | 27.324 | 1.00 | 33.63 | ? ? ? ? ? ? 3 | DC  | A C2    | 1 |
| ATOM | 36 | O | O2    | . DC  | A 1 3 | ? 7.552  | -1.720 | 27.493 | 1.00 | 33.20 | ? ? ? ? ? ? 3 | DC  | A O2    | 1 |
| ATOM | 37 | N | N3    | . DC  | A 1 3 | ? 9.537  | -2.790 | 27.708 | 1.00 | 34.36 | ? ? ? ? ? ? 3 | DC  | A N3    | 1 |
| ATOM | 38 | C | C4    | . DC  | A 1 3 | ? 10.247 | -3.901 | 27.511 | 1.00 | 35.83 | ? ? ? ? ? ? 3 | DC  | A C4    | 1 |
| ATOM | 39 | N | N4    | . DC  | A 1 3 | ? 11.529 | -3.895 | 27.888 | 1.00 | 38.69 | ? ? ? ? ? ? 3 | DC  | A N4    | 1 |
| ATOM | 40 | C | C5    | . DC  | A 1 3 | ? 9.691  | -5.046 | 26.867 | 1.00 | 36.91 | ? ? ? ? ? ? 3 | DC  | A C5    | 1 |
| ATOM | 41 | C | C6    | . DC  | A 1 3 | ? 8.397  | -4.990 | 26.524 | 1.00 | 35.23 | ? ? ? ? ? ? 3 | DC  | A C6    | 1 |
| ATOM | 42 | P | P     | . BZG | A 1 4 | ? 2.649  | -3.637 | 23.267 | 1.00 | 46.63 | ? ? ? ? ? ? 4 | BZG | A P     | 1 |
| ATOM | 43 | O | O1P   | . BZG | A 1 4 | ? 3.306  | -3.955 | 21.993 | 1.00 | 44.93 | ? ? ? ? ? ? 4 | BZG | A O1P   | 1 |
| ATOM | 44 | O | O2P   | . BZG | A 1 4 | ? 1.836  | -4.638 | 23.969 | 1.00 | 55.23 | ? ? ? ? ? ? 4 | BZG | A O2P   | 1 |
| ATOM | 45 | O | 'O5'' | . BZG | A 1 4 | ? 1.933  | -2.246 | 23.191 | 1.00 | 39.01 | ? ? ? ? ? ? 4 | BZG | A 'O5'' | 1 |
| ATOM | 46 | C | CZ1   | . BZG | A 1 4 | ? 11.175 | 0.290  | 21.777 | 1.00 | 37.59 | ? ? ? ? ? ? 4 | BZG | A CZ1   | 1 |

|      |    |   |       |   |     |   |   |   |   |        |        |        |      |       |   |   |   |   |   |   |   |   |     |   |       |   |
|------|----|---|-------|---|-----|---|---|---|---|--------|--------|--------|------|-------|---|---|---|---|---|---|---|---|-----|---|-------|---|
| ATOM | 47 | C | CT1   | . | BZG | A | 1 | 4 | ? | 12.294 | -0.517 | 21.686 | 1.00 | 39.06 | ? | ? | ? | ? | ? | ? | ? | 4 | BZG | A | CT1   | 1 |
| ATOM | 48 | C | CI    | . | BZG | A | 1 | 4 | ? | 13.507 | 0.035  | 22.067 | 1.00 | 33.85 | ? | ? | ? | ? | ? | ? | ? | 4 | BZG | A | CI    | 1 |
| ATOM | 49 | C | CT2   | . | BZG | A | 1 | 4 | ? | 13.624 | 1.374  | 22.446 | 1.00 | 36.75 | ? | ? | ? | ? | ? | ? | ? | 4 | BZG | A | CT2   | 1 |
| ATOM | 50 | C | CZ2   | . | BZG | A | 1 | 4 | ? | 12.497 | 2.161  | 22.581 | 1.00 | 36.31 | ? | ? | ? | ? | ? | ? | ? | 4 | BZG | A | CZ2   | 1 |
| ATOM | 51 | C | CE    | . | BZG | A | 1 | 4 | ? | 11.293 | 1.609  | 22.203 | 1.00 | 36.33 | ? | ? | ? | ? | ? | ? | ? | 4 | BZG | A | CE    | 1 |
| ATOM | 52 | C | CW    | . | BZG | A | 1 | 4 | ? | 10.069 | 2.471  | 22.307 | 1.00 | 34.89 | ? | ? | ? | ? | ? | ? | ? | 4 | BZG | A | CW    | 1 |
| ATOM | 53 | O | OL    | . | BZG | A | 1 | 4 | ? | 8.937  | 1.590  | 22.071 | 1.00 | 37.78 | ? | ? | ? | ? | ? | ? | ? | 4 | BZG | A | OL    | 1 |
| ATOM | 54 | C | CK    | . | BZG | A | 1 | 4 | ? | 7.707  | 2.091  | 22.327 | 1.00 | 35.01 | ? | ? | ? | ? | ? | ? | ? | 4 | BZG | A | CK    | 1 |
| ATOM | 55 | N | NJ    | . | BZG | A | 1 | 4 | ? | 7.570  | 3.379  | 22.668 | 1.00 | 36.53 | ? | ? | ? | ? | ? | ? | ? | 4 | BZG | A | NJ    | 1 |
| ATOM | 56 | C | CH    | . | BZG | A | 1 | 4 | ? | 6.358  | 3.899  | 22.966 | 1.00 | 39.60 | ? | ? | ? | ? | ? | ? | ? | 4 | BZG | A | CH    | 1 |
| ATOM | 57 | N | NI    | . | BZG | A | 1 | 4 | ? | 6.258  | 5.215  | 23.214 | 1.00 | 42.29 | ? | ? | ? | ? | ? | ? | ? | 4 | BZG | A | NI    | 1 |
| ATOM | 58 | N | NG    | . | BZG | A | 1 | 4 | ? | 5.249  | 3.116  | 22.978 | 1.00 | 37.80 | ? | ? | ? | ? | ? | ? | ? | 4 | BZG | A | NG    | 1 |
| ATOM | 59 | C | CF    | . | BZG | A | 1 | 4 | ? | 5.361  | 1.799  | 22.674 | 1.00 | 35.38 | ? | ? | ? | ? | ? | ? | ? | 4 | BZG | A | CF    | 1 |
| ATOM | 60 | C | CM    | . | BZG | A | 1 | 4 | ? | 6.607  | 1.239  | 22.361 | 1.00 | 37.85 | ? | ? | ? | ? | ? | ? | ? | 4 | BZG | A | CM    | 1 |
| ATOM | 61 | N | NN    | . | BZG | A | 1 | 4 | ? | 6.455  | -0.083 | 22.118 | 1.00 | 39.19 | ? | ? | ? | ? | ? | ? | ? | 4 | BZG | A | NN    | 1 |
| ATOM | 62 | C | CO    | . | BZG | A | 1 | 4 | ? | 5.137  | -0.349 | 22.296 | 1.00 | 39.06 | ? | ? | ? | ? | ? | ? | ? | 4 | BZG | A | CO    | 1 |
| ATOM | 63 | N | NE    | . | BZG | A | 1 | 4 | ? | 4.484  | 0.814  | 22.580 | 1.00 | 38.14 | ? | ? | ? | ? | ? | ? | ? | 4 | BZG | A | NE    | 1 |
| ATOM | 64 | C | 'CT'' | . | BZG | A | 1 | 4 | ? | 3.049  | 1.004  | 22.890 | 1.00 | 40.97 | ? | ? | ? | ? | ? | ? | ? | 4 | BZG | A | 'CT'' | 1 |
| ATOM | 65 | O | 'OS'' | . | BZG | A | 1 | 4 | ? | 2.752  | 0.367  | 24.126 | 1.00 | 41.96 | ? | ? | ? | ? | ? | ? | ? | 4 | BZG | A | 'OS'' | 1 |
| ATOM | 66 | C | 'CP'' | . | BZG | A | 1 | 4 | ? | 2.139  | 0.420  | 21.818 | 1.00 | 42.75 | ? | ? | ? | ? | ? | ? | ? | 4 | BZG | A | 'CP'' | 1 |
| ATOM | 67 | C | 'C5'' | . | BZG | A | 1 | 4 | ? | 1.432  | -1.656 | 24.357 | 1.00 | 40.60 | ? | ? | ? | ? | ? | ? | ? | 4 | BZG | A | 'C5'' | 1 |
| ATOM | 68 | C | 'C4'' | . | BZG | A | 1 | 4 | ? | 1.409  | -0.173 | 24.040 | 1.00 | 46.89 | ? | ? | ? | ? | ? | ? | ? | 4 | BZG | A | 'C4'' | 1 |
| ATOM | 69 | C | 'C3'' | . | BZG | A | 1 | 4 | ? | 0.883  | 0.134  | 22.623 | 1.00 | 46.88 | ? | ? | ? | ? | ? | ? | ? | 4 | BZG | A | 'C3'' | 1 |
| ATOM | 70 | O | 'O3'' | . | BZG | A | 1 | 4 | ? | 0.164  | 1.363  | 22.838 | 1.00 | 55.09 | ? | ? | ? | ? | ? | ? | ? | 4 | BZG | A | 'O3'' | 1 |
| ATOM | 71 | P | P     | . | DA  | A | 1 | 5 | ? | -0.648 | 2.070  | 21.637 | 1.00 | 58.27 | ? | ? | ? | ? | ? | ? | ? | 5 | DA  | A | P     | 1 |
| ATOM | 72 | O | OP1   | . | DA  | A | 1 | 5 | ? | -1.834 | 2.738  | 22.239 | 1.00 | 59.14 | ? | ? | ? | ? | ? | ? | ? | 5 | DA  | A | OP1   | 1 |
| ATOM | 73 | O | OP2   | . | DA  | A | 1 | 5 | ? | -0.808 | 1.074  | 20.536 | 1.00 | 59.17 | ? | ? | ? | ? | ? | ? | ? | 5 | DA  | A | OP2   | 1 |
| ATOM | 74 | O | 'O5'' | . | DA  | A | 1 | 5 | ? | 0.307  | 3.265  | 21.217 | 1.00 | 49.03 | ? | ? | ? | ? | ? | ? | ? | 5 | DA  | A | 'O5'' | 1 |
| ATOM | 75 | C | 'C5'' | . | DA  | A | 1 | 5 | ? | 0.681  | 4.240  | 22.198 | 1.00 | 48.58 | ? | ? | ? | ? | ? | ? | ? | 5 | DA  | A | 'C5'' | 1 |
| ATOM | 76 | C | 'C4'' | . | DA  | A | 1 | 5 | ? | 1.593  | 5.267  | 21.581 | 1.00 | 56.65 | ? | ? | ? | ? | ? | ? | ? | 5 | DA  | A | 'C4'' | 1 |
| ATOM | 77 | O | 'O4'' | . | DA  | A | 1 | 5 | ? | 2.908  | 4.711  | 21.358 | 1.00 | 53.36 | ? | ? | ? | ? | ? | ? | ? | 5 | DA  | A | 'O4'' | 1 |
| ATOM | 78 | C | 'C3'' | . | DA  | A | 1 | 5 | ? | 1.123  | 5.797  | 20.227 | 1.00 | 59.46 | ? | ? | ? | ? | ? | ? | ? | 5 | DA  | A | 'C3'' | 1 |
| ATOM | 79 | O | 'O3'' | . | DA  | A | 1 | 5 | ? | 1.300  | 7.208  | 20.242 | 1.00 | 60.34 | ? | ? | ? | ? | ? | ? | ? | 5 | DA  | A | 'O3'' | 1 |
| ATOM | 80 | C | 'C2'' | . | DA  | A | 1 | 5 | ? | 2.038  | 5.114  | 19.223 | 1.00 | 55.75 | ? | ? | ? | ? | ? | ? | ? | 5 | DA  | A | 'C2'' | 1 |
| ATOM | 81 | C | 'C1'' | . | DA  | A | 1 | 5 | ? | 3.316  | 4.936  | 20.017 | 1.00 | 51.87 | ? | ? | ? | ? | ? | ? | ? | 5 | DA  | A | 'C1'' | 1 |
| ATOM | 82 | N | N9    | . | DA  | A | 1 | 5 | ? | 4.126  | 3.793  | 19.610 | 1.00 | 46.83 | ? | ? | ? | ? | ? | ? | ? | 5 | DA  | A | N9    | 1 |
| ATOM | 83 | C | C8    | . | DA  | A | 1 | 5 | ? | 3.701  | 2.511  | 19.368 | 1.00 | 43.90 | ? | ? | ? | ? | ? | ? | ? | 5 | DA  | A | C8    | 1 |

|      |     |   |       |   |    |   |   |   |   |        |        |        |      |       |   |   |   |   |   |   |   |   |   |    |   |       |   |
|------|-----|---|-------|---|----|---|---|---|---|--------|--------|--------|------|-------|---|---|---|---|---|---|---|---|---|----|---|-------|---|
| ATOM | 84  | N | N7    | . | DA | A | 1 | 5 | ? | 4.669  | 1.681  | 19.062 | 1.00 | 44.68 | ? | ? | ? | ? | ? | ? | ? | ? | 5 | DA | A | N7    | 1 |
| ATOM | 85  | C | C5    | . | DA | A | 1 | 5 | ? | 5.813  | 2.463  | 19.135 | 1.00 | 42.49 | ? | ? | ? | ? | ? | ? | ? | ? | 5 | DA | A | C5    | 1 |
| ATOM | 86  | C | C6    | . | DA | A | 1 | 5 | ? | 7.172  | 2.158  | 18.979 | 1.00 | 36.19 | ? | ? | ? | ? | ? | ? | ? | ? | 5 | DA | A | C6    | 1 |
| ATOM | 87  | N | N6    | . | DA | A | 1 | 5 | ? | 7.619  | 0.949  | 18.637 | 1.00 | 36.49 | ? | ? | ? | ? | ? | ? | ? | ? | 5 | DA | A | N6    | 1 |
| ATOM | 88  | N | N1    | . | DA | A | 1 | 5 | ? | 8.060  | 3.168  | 19.099 | 1.00 | 36.14 | ? | ? | ? | ? | ? | ? | ? | ? | 5 | DA | A | N1    | 1 |
| ATOM | 89  | C | C2    | . | DA | A | 1 | 5 | ? | 7.610  | 4.377  | 19.460 | 1.00 | 36.19 | ? | ? | ? | ? | ? | ? | ? | ? | 5 | DA | A | C2    | 1 |
| ATOM | 90  | N | N3    | . | DA | A | 1 | 5 | ? | 6.358  | 4.781  | 19.670 | 1.00 | 42.40 | ? | ? | ? | ? | ? | ? | ? | ? | 5 | DA | A | N3    | 1 |
| ATOM | 91  | C | C4    | . | DA | A | 1 | 5 | ? | 5.498  | 3.760  | 19.499 | 1.00 | 35.08 | ? | ? | ? | ? | ? | ? | ? | ? | 5 | DA | A | C4    | 1 |
| ATOM | 92  | P | P     | . | DA | A | 1 | 6 | ? | 0.679  | 8.066  | 19.071 | 1.00 | 66.25 | ? | ? | ? | ? | ? | ? | ? | ? | 6 | DA | A | P     | 1 |
| ATOM | 93  | O | OP1   | . | DA | A | 1 | 6 | ? | -0.038 | 9.214  | 19.677 | 1.00 | 73.87 | ? | ? | ? | ? | ? | ? | ? | ? | 6 | DA | A | OP1   | 1 |
| ATOM | 94  | O | OP2   | . | DA | A | 1 | 6 | ? | -0.026 | 7.124  | 18.154 | 1.00 | 62.28 | ? | ? | ? | ? | ? | ? | ? | ? | 6 | DA | A | OP2   | 1 |
| ATOM | 95  | O | 'O5'' | . | DA | A | 1 | 6 | ? | 1.965  | 8.619  | 18.327 | 1.00 | 55.29 | ? | ? | ? | ? | ? | ? | ? | ? | 6 | DA | A | 'O5'' | 1 |
| ATOM | 96  | C | 'C5'' | . | DA | A | 1 | 6 | ? | 3.074  | 9.156  | 19.054 | 1.00 | 56.56 | ? | ? | ? | ? | ? | ? | ? | ? | 6 | DA | A | 'C5'' | 1 |
| ATOM | 97  | C | 'C4'' | . | DA | A | 1 | 6 | ? | 4.288  | 9.061  | 18.166 | 1.00 | 53.18 | ? | ? | ? | ? | ? | ? | ? | ? | 6 | DA | A | 'C4'' | 1 |
| ATOM | 98  | O | 'O4'' | . | DA | A | 1 | 6 | ? | 4.605  | 7.667  | 17.970 | 1.00 | 48.57 | ? | ? | ? | ? | ? | ? | ? | ? | 6 | DA | A | 'O4'' | 1 |
| ATOM | 99  | C | 'C3'' | . | DA | A | 1 | 6 | ? | 4.033  | 9.623  | 16.761 | 1.00 | 59.75 | ? | ? | ? | ? | ? | ? | ? | ? | 6 | DA | A | 'C3'' | 1 |
| ATOM | 100 | O | 'O3'' | . | DA | A | 1 | 6 | ? | 4.671  | 10.904 | 16.635 | 1.00 | 59.83 | ? | ? | ? | ? | ? | ? | ? | ? | 6 | DA | A | 'O3'' | 1 |
| ATOM | 101 | C | 'C2'' | . | DA | A | 1 | 6 | ? | 4.466  | 8.501  | 15.815 | 1.00 | 57.57 | ? | ? | ? | ? | ? | ? | ? | ? | 6 | DA | A | 'C2'' | 1 |
| ATOM | 102 | C | 'C1'' | . | DA | A | 1 | 6 | ? | 5.241  | 7.571  | 16.732 | 1.00 | 43.65 | ? | ? | ? | ? | ? | ? | ? | ? | 6 | DA | A | 'C1'' | 1 |
| ATOM | 103 | N | N9    | . | DA | A | 1 | 6 | ? | 5.326  | 6.159  | 16.375 | 1.00 | 38.41 | ? | ? | ? | ? | ? | ? | ? | ? | 6 | DA | A | N9    | 1 |
| ATOM | 104 | C | C8    | . | DA | A | 1 | 6 | ? | 4.358  | 5.195  | 16.240 | 1.00 | 32.72 | ? | ? | ? | ? | ? | ? | ? | ? | 6 | DA | A | C8    | 1 |
| ATOM | 105 | N | N7    | . | DA | A | 1 | 6 | ? | 4.833  | 4.013  | 15.917 | 1.00 | 34.57 | ? | ? | ? | ? | ? | ? | ? | ? | 6 | DA | A | N7    | 1 |
| ATOM | 106 | C | C5    | . | DA | A | 1 | 6 | ? | 6.209  | 4.200  | 15.909 | 1.00 | 39.39 | ? | ? | ? | ? | ? | ? | ? | ? | 6 | DA | A | C5    | 1 |
| ATOM | 107 | C | C6    | . | DA | A | 1 | 6 | ? | 7.281  | 3.323  | 15.681 | 1.00 | 36.78 | ? | ? | ? | ? | ? | ? | ? | ? | 6 | DA | A | C6    | 1 |
| ATOM | 108 | N | N6    | . | DA | A | 1 | 6 | ? | 7.130  | 2.029  | 15.402 | 1.00 | 36.24 | ? | ? | ? | ? | ? | ? | ? | ? | 6 | DA | A | N6    | 1 |
| ATOM | 109 | N | N1    | . | DA | A | 1 | 6 | ? | 8.529  | 3.843  | 15.685 | 1.00 | 40.20 | ? | ? | ? | ? | ? | ? | ? | ? | 6 | DA | A | N1    | 1 |
| ATOM | 110 | C | C2    | . | DA | A | 1 | 6 | ? | 8.683  | 5.138  | 15.979 | 1.00 | 42.40 | ? | ? | ? | ? | ? | ? | ? | ? | 6 | DA | A | C2    | 1 |
| ATOM | 111 | N | N3    | . | DA | A | 1 | 6 | ? | 7.757  | 6.057  | 16.242 | 1.00 | 44.66 | ? | ? | ? | ? | ? | ? | ? | ? | 6 | DA | A | N3    | 1 |
| ATOM | 112 | C | C4    | . | DA | A | 1 | 6 | ? | 6.526  | 5.514  | 16.198 | 1.00 | 39.31 | ? | ? | ? | ? | ? | ? | ? | ? | 6 | DA | A | C4    | 1 |
| ATOM | 113 | P | P     | . | DT | A | 1 | 7 | ? | 4.489  | 11.764 | 15.293 | 1.00 | 63.69 | ? | ? | ? | ? | ? | ? | ? | ? | 7 | DT | A | P     | 1 |
| ATOM | 114 | O | OP1   | . | DT | A | 1 | 7 | ? | 4.824  | 13.180 | 15.604 | 1.00 | 69.37 | ? | ? | ? | ? | ? | ? | ? | ? | 7 | DT | A | OP1   | 1 |
| ATOM | 115 | O | OP2   | . | DT | A | 1 | 7 | ? | 3.191  | 11.401 | 14.662 | 1.00 | 58.46 | ? | ? | ? | ? | ? | ? | ? | ? | 7 | DT | A | OP2   | 1 |
| ATOM | 116 | O | 'O5'' | . | DT | A | 1 | 7 | ? | 5.636  | 11.175 | 14.367 | 1.00 | 46.43 | ? | ? | ? | ? | ? | ? | ? | ? | 7 | DT | A | 'O5'' | 1 |
| ATOM | 117 | C | 'C5'' | . | DT | A | 1 | 7 | ? | 7.007  | 11.417 | 14.718 | 1.00 | 51.47 | ? | ? | ? | ? | ? | ? | ? | ? | 7 | DT | A | 'C5'' | 1 |
| ATOM | 118 | C | 'C4'' | . | DT | A | 1 | 7 | ? | 7.866  | 10.655 | 13.748 | 1.00 | 46.90 | ? | ? | ? | ? | ? | ? | ? | ? | 7 | DT | A | 'C4'' | 1 |
| ATOM | 119 | O | 'O4'' | . | DT | A | 1 | 7 | ? | 7.578  | 9.255  | 13.892 | 1.00 | 48.09 | ? | ? | ? | ? | ? | ? | ? | ? | 7 | DT | A | 'O4'' | 1 |
| ATOM | 120 | C | 'C3'' | . | DT | A | 1 | 7 | ? | 7.495  | 10.983 | 12.306 | 1.00 | 43.45 | ? | ? | ? | ? | ? | ? | ? | ? | 7 | DT | A | 'C3'' | 1 |

|      |     |   |       |       |       |          |        |        |      |       |               |     |   |       |   |
|------|-----|---|-------|-------|-------|----------|--------|--------|------|-------|---------------|-----|---|-------|---|
| ATOM | 121 | O | 'O3'' | . DT  | A 1 7 | ? 8.490  | 11.822 | 11.752 | 1.00 | 52.70 | ? ? ? ? ? ? 7 | DT  | A | 'O3'' | 1 |
| ATOM | 122 | C | 'C2'' | . DT  | A 1 7 | ? 7.380  | 9.628  | 11.617 | 1.00 | 50.70 | ? ? ? ? ? ? 7 | DT  | A | 'C2'' | 1 |
| ATOM | 123 | C | 'C1'' | . DT  | A 1 7 | ? 7.913  | 8.677  | 12.663 | 1.00 | 47.48 | ? ? ? ? ? ? 7 | DT  | A | 'C1'' | 1 |
| ATOM | 124 | N | N1    | . DT  | A 1 7 | ? 7.376  | 7.317  | 12.639 | 1.00 | 41.31 | ? ? ? ? ? ? 7 | DT  | A | N1    | 1 |
| ATOM | 125 | C | C2    | . DT  | A 1 7 | ? 8.289  | 6.297  | 12.506 | 1.00 | 41.88 | ? ? ? ? ? ? 7 | DT  | A | C2    | 1 |
| ATOM | 126 | O | O2    | . DT  | A 1 7 | ? 9.493  | 6.487  | 12.429 | 1.00 | 42.96 | ? ? ? ? ? ? 7 | DT  | A | O2    | 1 |
| ATOM | 127 | N | N3    | . DT  | A 1 7 | ? 7.745  | 5.043  | 12.494 | 1.00 | 38.18 | ? ? ? ? ? ? 7 | DT  | A | N3    | 1 |
| ATOM | 128 | C | C4    | . DT  | A 1 7 | ? 6.413  | 4.714  | 12.593 | 1.00 | 39.17 | ? ? ? ? ? ? 7 | DT  | A | C4    | 1 |
| ATOM | 129 | O | O4    | . DT  | A 1 7 | ? 6.074  | 3.542  | 12.534 | 1.00 | 42.62 | ? ? ? ? ? ? 7 | DT  | A | O4    | 1 |
| ATOM | 130 | C | C5    | . DT  | A 1 7 | ? 5.502  | 5.840  | 12.688 | 1.00 | 39.25 | ? ? ? ? ? ? 7 | DT  | A | C5    | 1 |
| ATOM | 131 | C | C7    | . DT  | A 1 7 | ? 4.033  | 5.582  | 12.805 | 1.00 | 37.23 | ? ? ? ? ? ? 7 | DT  | A | C7    | 1 |
| ATOM | 132 | C | C6    | . DT  | A 1 7 | ? 6.024  | 7.068  | 12.690 | 1.00 | 36.63 | ? ? ? ? ? ? 7 | DT  | A | C6    | 1 |
| ATOM | 133 | P | P     | . DT  | A 1 8 | ? 8.228  | 12.450 | 10.338 | 1.00 | 52.32 | ? ? ? ? ? ? 8 | DT  | A | P     | 1 |
| ATOM | 134 | O | OP1   | . DT  | A 1 8 | ? 8.908  | 13.746 | 10.289 | 1.00 | 52.05 | ? ? ? ? ? ? 8 | DT  | A | OP1   | 1 |
| ATOM | 135 | O | OP2   | . DT  | A 1 8 | ? 6.757  | 12.374 | 10.063 | 1.00 | 55.19 | ? ? ? ? ? ? 8 | DT  | A | OP2   | 1 |
| ATOM | 136 | O | 'O5'' | . DT  | A 1 8 | ? 8.910  | 11.384 | 9.375  | 1.00 | 46.41 | ? ? ? ? ? ? 8 | DT  | A | 'O5'' | 1 |
| ATOM | 137 | C | 'C5'' | . DT  | A 1 8 | ? 10.246 | 10.929 | 9.583  | 1.00 | 44.52 | ? ? ? ? ? ? 8 | DT  | A | 'C5'' | 1 |
| ATOM | 138 | C | 'C4'' | . DT  | A 1 8 | ? 10.482 | 9.804  | 8.610  | 1.00 | 43.89 | ? ? ? ? ? ? 8 | DT  | A | 'C4'' | 1 |
| ATOM | 139 | O | 'O4'' | . DT  | A 1 8 | ? 9.790  | 8.651  | 9.114  | 1.00 | 42.41 | ? ? ? ? ? ? 8 | DT  | A | 'O4'' | 1 |
| ATOM | 140 | C | 'C3'' | . DT  | A 1 8 | ? 9.850  | 10.104 | 7.249  | 1.00 | 48.97 | ? ? ? ? ? ? 8 | DT  | A | 'C3'' | 1 |
| ATOM | 141 | O | 'O3'' | . DT  | A 1 8 | ? 10.867 | 10.316 | 6.277  | 1.00 | 53.05 | ? ? ? ? ? ? 8 | DT  | A | 'O3'' | 1 |
| ATOM | 142 | C | 'C2'' | . DT  | A 1 8 | ? 8.964  | 8.904  | 6.950  | 1.00 | 40.46 | ? ? ? ? ? ? 8 | DT  | A | 'C2'' | 1 |
| ATOM | 143 | C | 'C1'' | . DT  | A 1 8 | ? 9.334  | 7.892  | 8.018  | 1.00 | 41.47 | ? ? ? ? ? ? 8 | DT  | A | 'C1'' | 1 |
| ATOM | 144 | N | N1    | . DT  | A 1 8 | ? 8.211  | 7.065  | 8.474  | 1.00 | 38.36 | ? ? ? ? ? ? 8 | DT  | A | N1    | 1 |
| ATOM | 145 | C | C2    | . DT  | A 1 8 | ? 8.433  | 5.721  | 8.676  | 1.00 | 39.71 | ? ? ? ? ? ? 8 | DT  | A | C2    | 1 |
| ATOM | 146 | O | O2    | . DT  | A 1 8 | ? 9.530  | 5.206  | 8.573  | 1.00 | 42.69 | ? ? ? ? ? ? 8 | DT  | A | O2    | 1 |
| ATOM | 147 | N | N3    | . DT  | A 1 8 | ? 7.323  | 5.008  | 9.045  | 1.00 | 37.19 | ? ? ? ? ? ? 8 | DT  | A | N3    | 1 |
| ATOM | 148 | C | C4    | . DT  | A 1 8 | ? 6.055  | 5.502  | 9.280  | 1.00 | 42.23 | ? ? ? ? ? ? 8 | DT  | A | C4    | 1 |
| ATOM | 149 | O | O4    | . DT  | A 1 8 | ? 5.156  | 4.739  | 9.627  | 1.00 | 44.03 | ? ? ? ? ? ? 8 | DT  | A | O4    | 1 |
| ATOM | 150 | C | C5    | . DT  | A 1 8 | ? 5.887  | 6.917  | 9.020  | 1.00 | 38.33 | ? ? ? ? ? ? 8 | DT  | A | C5    | 1 |
| ATOM | 151 | C | C7    | . DT  | A 1 8 | ? 4.544  | 7.541  | 9.235  | 1.00 | 43.91 | ? ? ? ? ? ? 8 | DT  | A | C7    | 1 |
| ATOM | 152 | C | C6    | . DT  | A 1 8 | ? 6.956  | 7.612  | 8.618  | 1.00 | 36.11 | ? ? ? ? ? ? 8 | DT  | A | C6    | 1 |
| ATOM | 153 | O | O1P   | . D3N | A 1 9 | ? 9.151  | 11.502 | 5.034  | 1.00 | 57.06 | ? ? ? ? ? ? 9 | D3N | A | O1P   | 1 |
| ATOM | 154 | P | P     | . D3N | A 1 9 | ? 10.467 | 10.803 | 4.830  | 1.00 | 59.57 | ? ? ? ? ? ? 9 | D3N | A | P     | 1 |
| ATOM | 155 | O | O2P   | . D3N | A 1 9 | ? 11.529 | 11.563 | 4.178  | 1.00 | 57.35 | ? ? ? ? ? ? 9 | D3N | A | O2P   | 1 |
| ATOM | 156 | O | 'O5'' | . D3N | A 1 9 | ? 10.132 | 9.407  | 4.099  | 1.00 | 45.73 | ? ? ? ? ? ? 9 | D3N | A | 'O5'' | 1 |
| ATOM | 157 | C | 'C5'' | . D3N | A 1 9 | ? 9.339  | 9.445  | 2.962  | 1.00 | 56.53 | ? ? ? ? ? ? 9 | D3N | A | 'C5'' | 1 |

|      |     |   |       |   |     |   |   |    |   |        |        |        |      |       |   |   |   |   |   |   |   |   |    |     |   |       |   |
|------|-----|---|-------|---|-----|---|---|----|---|--------|--------|--------|------|-------|---|---|---|---|---|---|---|---|----|-----|---|-------|---|
| ATOM | 158 | C | 'C4'' | . | D3N | A | 1 | 9  | ? | 9.661  | 8.312  | 2.011  | 1.00 | 49.95 | ? | ? | ? | ? | ? | ? | ? | ? | 9  | D3N | A | 'C4'' | 1 |
| ATOM | 159 | O | 'O4'' | . | D3N | A | 1 | 9  | ? | 8.863  | 7.224  | 2.387  | 1.00 | 46.67 | ? | ? | ? | ? | ? | ? | ? | ? | 9  | D3N | A | 'O4'' | 1 |
| ATOM | 160 | C | 'C3'' | . | D3N | A | 1 | 9  | ? | 9.320  | 8.677  | 0.601  | 1.00 | 47.42 | ? | ? | ? | ? | ? | ? | ? | ? | 9  | D3N | A | 'C3'' | 1 |
| ATOM | 161 | O | 'O3'' | . | D3N | A | 1 | 9  | ? | 10.640 | 8.976  | -0.003 | 1.00 | 54.09 | ? | ? | ? | ? | ? | ? | ? | ? | 9  | D3N | A | 'O3'' | 1 |
| ATOM | 162 | C | 'C2'' | . | D3N | A | 1 | 9  | ? | 8.658  | 7.422  | 0.042  | 1.00 | 44.59 | ? | ? | ? | ? | ? | ? | ? | ? | 9  | D3N | A | 'C2'' | 1 |
| ATOM | 163 | C | 'C1'' | . | D3N | A | 1 | 9  | ? | 8.417  | 6.534  | 1.230  | 1.00 | 46.91 | ? | ? | ? | ? | ? | ? | ? | ? | 9  | D3N | A | 'C1'' | 1 |
| ATOM | 164 | N | N1    | . | D3N | A | 1 | 9  | ? | 7.078  | 6.124  | 1.580  | 1.00 | 36.46 | ? | ? | ? | ? | ? | ? | ? | ? | 9  | D3N | A | N1    | 1 |
| ATOM | 165 | C | C2    | . | D3N | A | 1 | 9  | ? | 6.110  | 7.057  | 1.685  | 1.00 | 38.72 | ? | ? | ? | ? | ? | ? | ? | ? | 9  | D3N | A | C2    | 1 |
| ATOM | 166 | O | O2    | . | D3N | A | 1 | 9  | ? | 6.297  | 8.251  | 1.417  | 1.00 | 48.10 | ? | ? | ? | ? | ? | ? | ? | ? | 9  | D3N | A | O2    | 1 |
| ATOM | 167 | N | N3    | . | D3N | A | 1 | 9  | ? | 4.887  | 6.635  | 2.099  | 1.00 | 41.54 | ? | ? | ? | ? | ? | ? | ? | ? | 9  | D3N | A | N3    | 1 |
| ATOM | 168 | C | C4    | . | D3N | A | 1 | 9  | ? | 4.594  | 5.301  | 2.451  | 1.00 | 36.92 | ? | ? | ? | ? | ? | ? | ? | ? | 9  | D3N | A | C4    | 1 |
| ATOM | 169 | C | C5    | . | D3N | A | 1 | 9  | ? | 5.607  | 4.371  | 2.331  | 1.00 | 36.17 | ? | ? | ? | ? | ? | ? | ? | ? | 9  | D3N | A | C5    | 1 |
| ATOM | 170 | C | C6    | . | D3N | A | 1 | 9  | ? | 6.891  | 4.763  | 1.888  | 1.00 | 36.76 | ? | ? | ? | ? | ? | ? | ? | ? | 9  | D3N | A | C6    | 1 |
| ATOM | 171 | C | C7    | . | D3N | A | 1 | 9  | ? | 7.850  | 3.823  | 1.781  | 1.00 | 37.28 | ? | ? | ? | ? | ? | ? | ? | ? | 9  | D3N | A | C7    | 1 |
| ATOM | 172 | C | C8    | . | D3N | A | 1 | 9  | ? | 7.548  | 2.482  | 2.091  | 1.00 | 38.67 | ? | ? | ? | ? | ? | ? | ? | ? | 9  | D3N | A | C8    | 1 |
| ATOM | 173 | C | C9    | . | D3N | A | 1 | 9  | ? | 6.313  | 2.075  | 2.503  | 1.00 | 34.82 | ? | ? | ? | ? | ? | ? | ? | ? | 9  | D3N | A | C9    | 1 |
| ATOM | 174 | C | C10   | . | D3N | A | 1 | 9  | ? | 5.329  | 3.022  | 2.649  | 1.00 | 36.15 | ? | ? | ? | ? | ? | ? | ? | ? | 9  | D3N | A | C10   | 1 |
| ATOM | 175 | C | C11   | . | D3N | A | 1 | 9  | ? | 4.040  | 2.682  | 3.115  | 1.00 | 39.57 | ? | ? | ? | ? | ? | ? | ? | ? | 9  | D3N | A | C11   | 1 |
| ATOM | 176 | C | C12   | . | D3N | A | 1 | 9  | ? | 3.039  | 3.617  | 3.226  | 1.00 | 43.64 | ? | ? | ? | ? | ? | ? | ? | ? | 9  | D3N | A | C12   | 1 |
| ATOM | 177 | C | C13   | . | D3N | A | 1 | 9  | ? | 3.306  | 4.953  | 2.885  | 1.00 | 37.78 | ? | ? | ? | ? | ? | ? | ? | ? | 9  | D3N | A | C13   | 1 |
| ATOM | 178 | P | P     | . | DG  | A | 1 | 10 | ? | 10.766 | 9.455  | -1.541 | 1.00 | 52.40 | ? | ? | ? | ? | ? | ? | ? | ? | 10 | DG  | A | P     | 1 |
| ATOM | 179 | O | OP1   | . | DG  | A | 1 | 10 | ? | 11.926 | 10.387 | -1.619 | 1.00 | 52.96 | ? | ? | ? | ? | ? | ? | ? | ? | 10 | DG  | A | OP1   | 1 |
| ATOM | 180 | O | OP2   | . | DG  | A | 1 | 10 | ? | 9.429  | 9.942  | -2.020 | 1.00 | 49.83 | ? | ? | ? | ? | ? | ? | ? | ? | 10 | DG  | A | OP2   | 1 |
| ATOM | 181 | O | 'O5'' | . | DG  | A | 1 | 10 | ? | 11.122 | 8.085  | -2.299 | 1.00 | 46.54 | ? | ? | ? | ? | ? | ? | ? | ? | 10 | DG  | A | 'O5'' | 1 |
| ATOM | 182 | C | 'C5'' | . | DG  | A | 1 | 10 | ? | 12.098 | 7.130  | -1.833 | 1.00 | 40.41 | ? | ? | ? | ? | ? | ? | ? | ? | 10 | DG  | A | 'C5'' | 1 |
| ATOM | 183 | C | 'C4'' | . | DG  | A | 1 | 10 | ? | 11.817 | 5.781  | -2.467 | 1.00 | 46.19 | ? | ? | ? | ? | ? | ? | ? | ? | 10 | DG  | A | 'C4'' | 1 |
| ATOM | 184 | O | 'O4'' | . | DG  | A | 1 | 10 | ? | 10.495 | 5.337  | -2.050 | 1.00 | 41.89 | ? | ? | ? | ? | ? | ? | ? | ? | 10 | DG  | A | 'O4'' | 1 |
| ATOM | 185 | C | 'C3'' | . | DG  | A | 1 | 10 | ? | 11.772 | 5.751  | -3.999 | 1.00 | 42.11 | ? | ? | ? | ? | ? | ? | ? | ? | 10 | DG  | A | 'C3'' | 1 |
| ATOM | 186 | O | 'O3'' | . | DG  | A | 1 | 10 | ? | 11.986 | 4.386  | -4.405 | 1.00 | 43.10 | ? | ? | ? | ? | ? | ? | ? | ? | 10 | DG  | A | 'O3'' | 1 |
| ATOM | 187 | C | 'C2'' | . | DG  | A | 1 | 10 | ? | 10.312 | 6.041  | -4.278 | 1.00 | 37.56 | ? | ? | ? | ? | ? | ? | ? | ? | 10 | DG  | A | 'C2'' | 1 |
| ATOM | 188 | C | 'C1'' | . | DG  | A | 1 | 10 | ? | 9.649  | 5.223  | -3.182 | 1.00 | 39.74 | ? | ? | ? | ? | ? | ? | ? | ? | 10 | DG  | A | 'C1'' | 1 |
| ATOM | 189 | N | N9    | . | DG  | A | 1 | 10 | ? | 8.318  | 5.670  | -2.791 | 1.00 | 36.64 | ? | ? | ? | ? | ? | ? | ? | ? | 10 | DG  | A | N9    | 1 |
| ATOM | 190 | C | C8    | . | DG  | A | 1 | 10 | ? | 7.813  | 6.946  | -2.904 | 1.00 | 38.12 | ? | ? | ? | ? | ? | ? | ? | ? | 10 | DG  | A | C8    | 1 |
| ATOM | 191 | N | N7    | . | DG  | A | 1 | 10 | ? | 6.596  | 7.058  | -2.443 | 1.00 | 33.59 | ? | ? | ? | ? | ? | ? | ? | ? | 10 | DG  | A | N7    | 1 |
| ATOM | 192 | C | C5    | . | DG  | A | 1 | 10 | ? | 6.277  | 5.778  | -1.999 | 1.00 | 32.82 | ? | ? | ? | ? | ? | ? | ? | ? | 10 | DG  | A | C5    | 1 |
| ATOM | 193 | C | C6    | . | DG  | A | 1 | 10 | ? | 5.098  | 5.289  | -1.387 | 1.00 | 33.36 | ? | ? | ? | ? | ? | ? | ? | ? | 10 | DG  | A | C6    | 1 |
| ATOM | 194 | O | O6    | . | DG  | A | 1 | 10 | ? | 4.056  | 5.900  | -1.124 | 1.00 | 33.85 | ? | ? | ? | ? | ? | ? | ? | ? | 10 | DG  | A | O6    | 1 |

|      |     |   |       |   |    |   |   |    |   |        |        |         |      |       |   |   |   |   |   |   |   |    |    |   |       |   |
|------|-----|---|-------|---|----|---|---|----|---|--------|--------|---------|------|-------|---|---|---|---|---|---|---|----|----|---|-------|---|
| ATOM | 195 | N | N1    | . | DG | A | 1 | 10 | ? | 5.178  | 3.921  | -1.139  | 1.00 | 32.10 | ? | ? | ? | ? | ? | ? | ? | 10 | DG | A | N1    | 1 |
| ATOM | 196 | C | C2    | . | DG | A | 1 | 10 | ? | 6.298  | 3.154  | -1.316  | 1.00 | 32.80 | ? | ? | ? | ? | ? | ? | ? | 10 | DG | A | C2    | 1 |
| ATOM | 197 | N | N2    | . | DG | A | 1 | 10 | ? | 6.170  | 1.847  | -1.011  | 1.00 | 30.07 | ? | ? | ? | ? | ? | ? | ? | 10 | DG | A | N2    | 1 |
| ATOM | 198 | N | N3    | . | DG | A | 1 | 10 | ? | 7.410  | 3.596  | -1.892  | 1.00 | 30.93 | ? | ? | ? | ? | ? | ? | ? | 10 | DG | A | N3    | 1 |
| ATOM | 199 | C | C4    | . | DG | A | 1 | 10 | ? | 7.337  | 4.916  | -2.184  | 1.00 | 36.17 | ? | ? | ? | ? | ? | ? | ? | 10 | DG | A | C4    | 1 |
| ATOM | 200 | P | P     | . | DC | A | 1 | 11 | ? | 12.576 | 3.993  | -5.867  | 1.00 | 45.72 | ? | ? | ? | ? | ? | ? | ? | 11 | DC | A | P     | 1 |
| ATOM | 201 | O | OP1   | . | DC | A | 1 | 11 | ? | 14.013 | 3.708  | -5.707  | 1.00 | 55.46 | ? | ? | ? | ? | ? | ? | ? | 11 | DC | A | OP1   | 1 |
| ATOM | 202 | O | OP2   | . | DC | A | 1 | 11 | ? | 12.140 | 4.979  | -6.893  | 1.00 | 40.18 | ? | ? | ? | ? | ? | ? | ? | 11 | DC | A | OP2   | 1 |
| ATOM | 203 | O | 'O5'' | . | DC | A | 1 | 11 | ? | 11.897 | 2.569  | -6.086  | 1.00 | 42.94 | ? | ? | ? | ? | ? | ? | ? | 11 | DC | A | 'O5'' | 1 |
| ATOM | 204 | C | 'C5'' | . | DC | A | 1 | 11 | ? | 12.323 | 1.462  | -5.304  | 1.00 | 35.76 | ? | ? | ? | ? | ? | ? | ? | 11 | DC | A | 'C5'' | 1 |
| ATOM | 205 | C | 'C4'' | . | DC | A | 1 | 11 | ? | 11.244 | 0.407  | -5.260  | 1.00 | 38.62 | ? | ? | ? | ? | ? | ? | ? | 11 | DC | A | 'C4'' | 1 |
| ATOM | 206 | O | 'O4'' | . | DC | A | 1 | 11 | ? | 10.071 | 0.969  | -4.638  | 1.00 | 38.55 | ? | ? | ? | ? | ? | ? | ? | 11 | DC | A | 'O4'' | 1 |
| ATOM | 207 | C | 'C3'' | . | DC | A | 1 | 11 | ? | 10.785 | -0.117 | -6.624  | 1.00 | 41.61 | ? | ? | ? | ? | ? | ? | ? | 11 | DC | A | 'C3'' | 1 |
| ATOM | 208 | O | 'O3'' | . | DC | A | 1 | 11 | ? | 10.597 | -1.537 | -6.580  | 1.00 | 36.55 | ? | ? | ? | ? | ? | ? | ? | 11 | DC | A | 'O3'' | 1 |
| ATOM | 209 | C | 'C2'' | . | DC | A | 1 | 11 | ? | 9.399  | 0.483  | -6.801  | 1.00 | 35.59 | ? | ? | ? | ? | ? | ? | ? | 11 | DC | A | 'C2'' | 1 |
| ATOM | 210 | C | 'C1'' | . | DC | A | 1 | 11 | ? | 8.928  | 0.621  | -5.361  | 1.00 | 32.15 | ? | ? | ? | ? | ? | ? | ? | 11 | DC | A | 'C1'' | 1 |
| ATOM | 211 | N | N1    | . | DC | A | 1 | 11 | ? | 7.930  | 1.697  | -5.184  | 1.00 | 32.78 | ? | ? | ? | ? | ? | ? | ? | 11 | DC | A | N1    | 1 |
| ATOM | 212 | C | C2    | . | DC | A | 1 | 11 | ? | 6.724  | 1.419  | -4.517  | 1.00 | 33.71 | ? | ? | ? | ? | ? | ? | ? | 11 | DC | A | C2    | 1 |
| ATOM | 213 | O | O2    | . | DC | A | 1 | 11 | ? | 6.588  | 0.324  | -3.936  | 1.00 | 35.86 | ? | ? | ? | ? | ? | ? | ? | 11 | DC | A | O2    | 1 |
| ATOM | 214 | N | N3    | . | DC | A | 1 | 11 | ? | 5.767  | 2.369  | -4.474  | 1.00 | 30.73 | ? | ? | ? | ? | ? | ? | ? | 11 | DC | A | N3    | 1 |
| ATOM | 215 | C | C4    | . | DC | A | 1 | 11 | ? | 5.992  | 3.574  | -5.013  | 1.00 | 31.53 | ? | ? | ? | ? | ? | ? | ? | 11 | DC | A | C4    | 1 |
| ATOM | 216 | N | N4    | . | DC | A | 1 | 11 | ? | 5.017  | 4.482  | -4.943  | 1.00 | 29.21 | ? | ? | ? | ? | ? | ? | ? | 11 | DC | A | N4    | 1 |
| ATOM | 217 | C | C5    | . | DC | A | 1 | 11 | ? | 7.212  | 3.886  | -5.677  | 1.00 | 29.13 | ? | ? | ? | ? | ? | ? | ? | 11 | DC | A | C5    | 1 |
| ATOM | 218 | C | C6    | . | DC | A | 1 | 11 | ? | 8.141  | 2.926  | -5.747  | 1.00 | 34.19 | ? | ? | ? | ? | ? | ? | ? | 11 | DC | A | C6    | 1 |
| ATOM | 219 | P | P     | . | DG | A | 1 | 12 | ? | 11.039 | -2.438 | -7.862  | 1.00 | 43.78 | ? | ? | ? | ? | ? | ? | ? | 12 | DG | A | P     | 1 |
| ATOM | 220 | O | OP1   | . | DG | A | 1 | 12 | ? | 10.876 | -3.861 | -7.477  | 1.00 | 44.28 | ? | ? | ? | ? | ? | ? | ? | 12 | DG | A | OP1   | 1 |
| ATOM | 221 | O | OP2   | . | DG | A | 1 | 12 | ? | 12.357 | -1.933 | -8.370  | 1.00 | 40.00 | ? | ? | ? | ? | ? | ? | ? | 12 | DG | A | OP2   | 1 |
| ATOM | 222 | O | 'O5'' | . | DG | A | 1 | 12 | ? | 9.983  | -2.054 | -8.975  | 1.00 | 40.27 | ? | ? | ? | ? | ? | ? | ? | 12 | DG | A | 'O5'' | 1 |
| ATOM | 223 | C | 'C5'' | . | DG | A | 1 | 12 | ? | 8.619  | -2.501 | -8.874  | 1.00 | 43.08 | ? | ? | ? | ? | ? | ? | ? | 12 | DG | A | 'C5'' | 1 |
| ATOM | 224 | C | 'C4'' | . | DG | A | 1 | 12 | ? | 7.882  | -2.053 | -10.106 | 1.00 | 39.93 | ? | ? | ? | ? | ? | ? | ? | 12 | DG | A | 'C4'' | 1 |
| ATOM | 225 | O | 'O4'' | . | DG | A | 1 | 12 | ? | 7.921  | -0.607 | -10.134 | 1.00 | 36.76 | ? | ? | ? | ? | ? | ? | ? | 12 | DG | A | 'O4'' | 1 |
| ATOM | 226 | C | 'C3'' | . | DG | A | 1 | 12 | ? | 8.562  | -2.505 | -11.397 | 1.00 | 40.02 | ? | ? | ? | ? | ? | ? | ? | 12 | DG | A | 'C3'' | 1 |
| ATOM | 227 | O | 'O3'' | . | DG | A | 1 | 12 | ? | 7.910  | -3.662 | -11.897 | 1.00 | 39.85 | ? | ? | ? | ? | ? | ? | ? | 12 | DG | A | 'O3'' | 1 |
| ATOM | 228 | C | 'C2'' | . | DG | A | 1 | 12 | ? | 8.360  | -1.335 | -12.320 | 1.00 | 38.74 | ? | ? | ? | ? | ? | ? | ? | 12 | DG | A | 'C2'' | 1 |
| ATOM | 229 | C | 'C1'' | . | DG | A | 1 | 12 | ? | 8.439  | -0.157 | -11.368 | 1.00 | 39.35 | ? | ? | ? | ? | ? | ? | ? | 12 | DG | A | 'C1'' | 1 |
| ATOM | 230 | N | N9    | . | DG | A | 1 | 12 | ? | 9.781  | 0.359  | -11.119 | 1.00 | 37.62 | ? | ? | ? | ? | ? | ? | ? | 12 | DG | A | N9    | 1 |
| ATOM | 231 | C | C8    | . | DG | A | 1 | 12 | ? | 10.976 | -0.269 | -11.381 | 1.00 | 44.00 | ? | ? | ? | ? | ? | ? | ? | 12 | DG | A | C8    | 1 |

|      |     |   |       |   |    |   |   |    |   |        |        |         |      |        |   |   |   |   |   |   |   |   |    |    |   |       |   |
|------|-----|---|-------|---|----|---|---|----|---|--------|--------|---------|------|--------|---|---|---|---|---|---|---|---|----|----|---|-------|---|
| ATOM | 232 | N | N7    | . | DG | A | 1 | 12 | ? | 12.012 | 0.429  | -11.001 | 1.00 | 42.04  | ? | ? | ? | ? | ? | ? | ? | ? | 12 | DG | A | N7    | 1 |
| ATOM | 233 | C | C5    | . | DG | A | 1 | 12 | ? | 11.465 | 1.537  | -10.366 | 1.00 | 41.36  | ? | ? | ? | ? | ? | ? | ? | ? | 12 | DG | A | C5    | 1 |
| ATOM | 234 | C | C6    | . | DG | A | 1 | 12 | ? | 12.096 | 2.635  | -9.733  | 1.00 | 46.68  | ? | ? | ? | ? | ? | ? | ? | ? | 12 | DG | A | C6    | 1 |
| ATOM | 235 | O | O6    | . | DG | A | 1 | 12 | ? | 13.304 | 2.848  | -9.585  | 1.00 | 44.90  | ? | ? | ? | ? | ? | ? | ? | ? | 12 | DG | A | O6    | 1 |
| ATOM | 236 | N | N1    | . | DG | A | 1 | 12 | ? | 11.166 | 3.555  | -9.257  | 1.00 | 37.19  | ? | ? | ? | ? | ? | ? | ? | ? | 12 | DG | A | N1    | 1 |
| ATOM | 237 | C | C2    | . | DG | A | 1 | 12 | ? | 9.805  | 3.432  | -9.369  | 1.00 | 37.43  | ? | ? | ? | ? | ? | ? | ? | ? | 12 | DG | A | C2    | 1 |
| ATOM | 238 | N | N2    | . | DG | A | 1 | 12 | ? | 9.081  | 4.437  | -8.858  | 1.00 | 34.27  | ? | ? | ? | ? | ? | ? | ? | ? | 12 | DG | A | N2    | 1 |
| ATOM | 239 | N | N3    | . | DG | A | 1 | 12 | ? | 9.202  | 2.383  | -9.905  | 1.00 | 34.44  | ? | ? | ? | ? | ? | ? | ? | ? | 12 | DG | A | N3    | 1 |
| ATOM | 240 | C | C4    | . | DG | A | 1 | 12 | ? | 10.088 | 1.495  | -10.408 | 1.00 | 38.94  | ? | ? | ? | ? | ? | ? | ? | ? | 12 | DG | A | C4    | 1 |
| ATOM | 241 | O | 'O3'' | . | DC | B | 1 | 1  | ? | -6.095 | 1.968  | -3.008  | 1.00 | 104.56 | ? | ? | ? | ? | ? | ? | ? | ? | 13 | DC | B | 'O3'' | 1 |
| ATOM | 242 | P | P     | . | DG | B | 1 | 2  | ? | -4.822 | 1.409  | -3.812  | 1.00 | 105.65 | ? | ? | ? | ? | ? | ? | ? | ? | 14 | DG | B | P     | 1 |
| ATOM | 243 | O | OP1   | . | DG | B | 1 | 2  | ? | -3.885 | 2.550  | -4.035  | 1.00 | 96.18  | ? | ? | ? | ? | ? | ? | ? | ? | 14 | DG | B | OP1   | 1 |
| ATOM | 244 | O | OP2   | . | DG | B | 1 | 2  | ? | -5.315 | 0.603  | -4.976  | 1.00 | 78.96  | ? | ? | ? | ? | ? | ? | ? | ? | 14 | DG | B | OP2   | 1 |
| ATOM | 245 | O | 'O5'' | . | DG | B | 1 | 2  | ? | -4.185 | 0.364  | -2.794  | 1.00 | 74.48  | ? | ? | ? | ? | ? | ? | ? | ? | 14 | DG | B | 'O5'' | 1 |
| ATOM | 246 | C | 'C5'' | . | DG | B | 1 | 2  | ? | -3.928 | -0.984 | -3.220  | 1.00 | 57.72  | ? | ? | ? | ? | ? | ? | ? | ? | 14 | DG | B | 'C5'' | 1 |
| ATOM | 247 | C | 'C4'' | . | DG | B | 1 | 2  | ? | -2.876 | -1.621 | -2.345  | 1.00 | 54.83  | ? | ? | ? | ? | ? | ? | ? | ? | 14 | DG | B | 'C4'' | 1 |
| ATOM | 248 | O | 'O4'' | . | DG | B | 1 | 2  | ? | -1.555 | -1.129 | -2.675  | 1.00 | 52.37  | ? | ? | ? | ? | ? | ? | ? | ? | 14 | DG | B | 'O4'' | 1 |
| ATOM | 249 | C | 'C3'' | . | DG | B | 1 | 2  | ? | -3.040 | -1.398 | -0.847  | 1.00 | 47.69  | ? | ? | ? | ? | ? | ? | ? | ? | 14 | DG | B | 'C3'' | 1 |
| ATOM | 250 | O | 'O3'' | . | DG | B | 1 | 2  | ? | -2.610 | -2.634 | -0.294  | 1.00 | 47.75  | ? | ? | ? | ? | ? | ? | ? | ? | 14 | DG | B | 'O3'' | 1 |
| ATOM | 251 | C | 'C2'' | . | DG | B | 1 | 2  | ? | -2.064 | -0.272 | -0.550  | 1.00 | 44.50  | ? | ? | ? | ? | ? | ? | ? | ? | 14 | DG | B | 'C2'' | 1 |
| ATOM | 252 | C | 'C1'' | . | DG | B | 1 | 2  | ? | -0.942 | -0.523 | -1.550  | 1.00 | 46.21  | ? | ? | ? | ? | ? | ? | ? | ? | 14 | DG | B | 'C1'' | 1 |
| ATOM | 253 | N | N9    | . | DG | B | 1 | 2  | ? | -0.301 | 0.694  | -2.022  | 1.00 | 32.96  | ? | ? | ? | ? | ? | ? | ? | ? | 14 | DG | B | N9    | 1 |
| ATOM | 254 | C | C8    | . | DG | B | 1 | 2  | ? | -0.949 | 1.860  | -2.348  | 1.00 | 38.11  | ? | ? | ? | ? | ? | ? | ? | ? | 14 | DG | B | C8    | 1 |
| ATOM | 255 | N | N7    | . | DG | B | 1 | 2  | ? | -0.162 | 2.749  | -2.890  | 1.00 | 34.89  | ? | ? | ? | ? | ? | ? | ? | ? | 14 | DG | B | N7    | 1 |
| ATOM | 256 | C | C5    | . | DG | B | 1 | 2  | ? | 1.083  | 2.136  | -2.918  | 1.00 | 35.32  | ? | ? | ? | ? | ? | ? | ? | ? | 14 | DG | B | C5    | 1 |
| ATOM | 257 | C | C6    | . | DG | B | 1 | 2  | ? | 2.324  | 2.613  | -3.403  | 1.00 | 32.74  | ? | ? | ? | ? | ? | ? | ? | ? | 14 | DG | B | C6    | 1 |
| ATOM | 258 | O | O6    | . | DG | B | 1 | 2  | ? | 2.594  | 3.731  | -3.859  | 1.00 | 38.67  | ? | ? | ? | ? | ? | ? | ? | ? | 14 | DG | B | O6    | 1 |
| ATOM | 259 | N | N1    | . | DG | B | 1 | 2  | ? | 3.340  | 1.683  | -3.204  | 1.00 | 33.06  | ? | ? | ? | ? | ? | ? | ? | ? | 14 | DG | B | N1    | 1 |
| ATOM | 260 | C | C2    | . | DG | B | 1 | 2  | ? | 3.155  | 0.400  | -2.738  | 1.00 | 30.22  | ? | ? | ? | ? | ? | ? | ? | ? | 14 | DG | B | C2    | 1 |
| ATOM | 261 | N | N2    | . | DG | B | 1 | 2  | ? | 4.259  | -0.379 | -2.677  | 1.00 | 32.78  | ? | ? | ? | ? | ? | ? | ? | ? | 14 | DG | B | N2    | 1 |
| ATOM | 262 | N | N3    | . | DG | B | 1 | 2  | ? | 1.989  | -0.073 | -2.324  | 1.00 | 33.84  | ? | ? | ? | ? | ? | ? | ? | ? | 14 | DG | B | N3    | 1 |
| ATOM | 263 | C | C4    | . | DG | B | 1 | 2  | ? | 1.002  | 0.844  | -2.441  | 1.00 | 34.05  | ? | ? | ? | ? | ? | ? | ? | ? | 14 | DG | B | C4    | 1 |
| ATOM | 264 | P | P     | . | DC | B | 1 | 3  | ? | -2.707 | -2.910 | 1.247   | 1.00 | 52.14  | ? | ? | ? | ? | ? | ? | ? | ? | 15 | DC | B | P     | 1 |
| ATOM | 265 | O | OP1   | . | DC | B | 1 | 3  | ? | -2.794 | -4.367 | 1.421   | 1.00 | 52.06  | ? | ? | ? | ? | ? | ? | ? | ? | 15 | DC | B | OP1   | 1 |
| ATOM | 266 | O | OP2   | . | DC | B | 1 | 3  | ? | -3.707 | -1.995 | 1.828   | 1.00 | 47.13  | ? | ? | ? | ? | ? | ? | ? | ? | 15 | DC | B | OP2   | 1 |
| ATOM | 267 | O | 'O5'' | . | DC | B | 1 | 3  | ? | -1.258 | -2.522 | 1.759   | 1.00 | 45.23  | ? | ? | ? | ? | ? | ? | ? | ? | 15 | DC | B | 'O5'' | 1 |
| ATOM | 268 | C | 'C5'' | . | DC | B | 1 | 3  | ? | -0.153 | -3.310 | 1.307   | 1.00 | 46.29  | ? | ? | ? | ? | ? | ? | ? | ? | 15 | DC | B | 'C5'' | 1 |

|      |     |   |       |       |   |   |   |   |        |        |        |      |       |   |   |   |   |   |   |   |    |     |   |       |   |
|------|-----|---|-------|-------|---|---|---|---|--------|--------|--------|------|-------|---|---|---|---|---|---|---|----|-----|---|-------|---|
| ATOM | 269 | C | 'C4'' | . DC  | B | 1 | 3 | ? | 1.130  | -2.589 | 1.622  | 1.00 | 42.32 | ? | ? | ? | ? | ? | ? | ? | 15 | DC  | B | 'C4'' | 1 |
| ATOM | 270 | O | 'O4'' | . DC  | B | 1 | 3 | ? | 1.192  | -1.371 | 0.856  | 1.00 | 45.55 | ? | ? | ? | ? | ? | ? | ? | 15 | DC  | B | 'O4'' | 1 |
| ATOM | 271 | C | 'C3'' | . DC  | B | 1 | 3 | ? | 1.296  | -2.166 | 3.088  | 1.00 | 47.96 | ? | ? | ? | ? | ? | ? | ? | 15 | DC  | B | 'C3'' | 1 |
| ATOM | 272 | O | 'O3'' | . DC  | B | 1 | 3 | ? | 2.440  | -2.809 | 3.642  | 1.00 | 56.55 | ? | ? | ? | ? | ? | ? | ? | 15 | DC  | B | 'O3'' | 1 |
| ATOM | 273 | C | 'C2'' | . DC  | B | 1 | 3 | ? | 1.637  | -0.684 | 3.018  | 1.00 | 42.57 | ? | ? | ? | ? | ? | ? | ? | 15 | DC  | B | 'C2'' | 1 |
| ATOM | 274 | C | 'C1'' | . DC  | B | 1 | 3 | ? | 2.050  | -0.520 | 1.577  | 1.00 | 36.84 | ? | ? | ? | ? | ? | ? | ? | 15 | DC  | B | 'C1'' | 1 |
| ATOM | 275 | N | N1    | . DC  | B | 1 | 3 | ? | 1.874  | 0.836  | 1.061  | 1.00 | 37.49 | ? | ? | ? | ? | ? | ? | ? | 15 | DC  | B | N1    | 1 |
| ATOM | 276 | C | C2    | . DC  | B | 1 | 3 | ? | 2.964  | 1.476  | 0.473  | 1.00 | 35.12 | ? | ? | ? | ? | ? | ? | ? | 15 | DC  | B | C2    | 1 |
| ATOM | 277 | O | O2    | . DC  | B | 1 | 3 | ? | 4.049  | 0.859  | 0.377  | 1.00 | 30.92 | ? | ? | ? | ? | ? | ? | ? | 15 | DC  | B | O2    | 1 |
| ATOM | 278 | N | N3    | . DC  | B | 1 | 3 | ? | 2.818  | 2.739  | 0.015  | 1.00 | 30.96 | ? | ? | ? | ? | ? | ? | ? | 15 | DC  | B | N3    | 1 |
| ATOM | 279 | C | C4    | . DC  | B | 1 | 3 | ? | 1.651  | 3.370  | 0.160  | 1.00 | 35.63 | ? | ? | ? | ? | ? | ? | ? | 15 | DC  | B | C4    | 1 |
| ATOM | 280 | N | N4    | . DC  | B | 1 | 3 | ? | 1.553  | 4.608  | -0.306 | 1.00 | 31.76 | ? | ? | ? | ? | ? | ? | ? | 15 | DC  | B | N4    | 1 |
| ATOM | 281 | C | C5    | . DC  | B | 1 | 3 | ? | 0.510  | 2.724  | 0.715  | 1.00 | 31.16 | ? | ? | ? | ? | ? | ? | ? | 15 | DC  | B | C5    | 1 |
| ATOM | 282 | C | C6    | . DC  | B | 1 | 3 | ? | 0.664  | 1.466  | 1.147  | 1.00 | 30.61 | ? | ? | ? | ? | ? | ? | ? | 15 | DC  | B | C6    | 1 |
| ATOM | 283 | P | P     | . BZG | B | 1 | 4 | ? | 2.251  | -3.983 | 4.705  | 1.00 | 59.25 | ? | ? | ? | ? | ? | ? | ? | 16 | BZG | B | P     | 1 |
| ATOM | 284 | O | O1P   | . BZG | B | 1 | 4 | ? | 1.758  | -3.334 | 5.965  | 1.00 | 59.84 | ? | ? | ? | ? | ? | ? | ? | 16 | BZG | B | O1P   | 1 |
| ATOM | 285 | O | O2P   | . BZG | B | 1 | 4 | ? | 1.431  | -4.994 | 3.984  | 1.00 | 58.44 | ? | ? | ? | ? | ? | ? | ? | 16 | BZG | B | O2P   | 1 |
| ATOM | 286 | O | 'O5'' | . BZG | B | 1 | 4 | ? | 3.716  | -4.525 | 4.868  | 1.00 | 53.19 | ? | ? | ? | ? | ? | ? | ? | 16 | BZG | B | 'O5'' | 1 |
| ATOM | 287 | C | CZ1   | . BZG | B | 1 | 4 | ? | 6.738  | 6.622  | 5.264  | 1.00 | 37.15 | ? | ? | ? | ? | ? | ? | ? | 16 | BZG | B | CZ1   | 1 |
| ATOM | 288 | C | CT1   | . BZG | B | 1 | 4 | ? | 5.819  | 7.656  | 5.321  | 1.00 | 40.05 | ? | ? | ? | ? | ? | ? | ? | 16 | BZG | B | CT1   | 1 |
| ATOM | 289 | C | CI    | . BZG | B | 1 | 4 | ? | 4.485  | 7.425  | 5.686  | 1.00 | 46.13 | ? | ? | ? | ? | ? | ? | ? | 16 | BZG | B | CI    | 1 |
| ATOM | 290 | C | CT2   | . BZG | B | 1 | 4 | ? | 4.042  | 6.151  | 6.055  | 1.00 | 42.60 | ? | ? | ? | ? | ? | ? | ? | 16 | BZG | B | CT2   | 1 |
| ATOM | 291 | C | CZ2   | . BZG | B | 1 | 4 | ? | 4.968  | 5.094  | 6.004  | 1.00 | 41.87 | ? | ? | ? | ? | ? | ? | ? | 16 | BZG | B | CZ2   | 1 |
| ATOM | 292 | C | CE    | . BZG | B | 1 | 4 | ? | 6.295  | 5.331  | 5.627  | 1.00 | 36.41 | ? | ? | ? | ? | ? | ? | ? | 16 | BZG | B | CE    | 1 |
| ATOM | 293 | C | CW    | . BZG | B | 1 | 4 | ? | 7.263  | 4.189  | 5.618  | 1.00 | 39.93 | ? | ? | ? | ? | ? | ? | ? | 16 | BZG | B | CW    | 1 |
| ATOM | 294 | O | OL    | . BZG | B | 1 | 4 | ? | 6.564  | 2.941  | 5.856  | 1.00 | 43.12 | ? | ? | ? | ? | ? | ? | ? | 16 | BZG | B | OL    | 1 |
| ATOM | 295 | C | CK    | . BZG | B | 1 | 4 | ? | 7.211  | 1.733  | 5.634  | 1.00 | 40.04 | ? | ? | ? | ? | ? | ? | ? | 16 | BZG | B | CK    | 1 |
| ATOM | 296 | N | NJ    | . BZG | B | 1 | 4 | ? | 8.525  | 1.744  | 5.314  | 1.00 | 43.22 | ? | ? | ? | ? | ? | ? | ? | 16 | BZG | B | NJ    | 1 |
| ATOM | 297 | C | CH    | . BZG | B | 1 | 4 | ? | 9.182  | 0.577  | 5.068  | 1.00 | 43.83 | ? | ? | ? | ? | ? | ? | ? | 16 | BZG | B | CH    | 1 |
| ATOM | 298 | N | NI    | . BZG | B | 1 | 4 | ? | 10.491 | 0.578  | 4.779  | 1.00 | 45.60 | ? | ? | ? | ? | ? | ? | ? | 16 | BZG | B | NI    | 1 |
| ATOM | 299 | N | NG    | . BZG | B | 1 | 4 | ? | 8.549  | -0.623 | 5.114  | 1.00 | 42.53 | ? | ? | ? | ? | ? | ? | ? | 16 | BZG | B | NG    | 1 |
| ATOM | 300 | C | CF    | . BZG | B | 1 | 4 | ? | 7.252  | -0.663 | 5.426  | 1.00 | 39.41 | ? | ? | ? | ? | ? | ? | ? | 16 | BZG | B | CF    | 1 |
| ATOM | 301 | C | CM    | . BZG | B | 1 | 4 | ? | 6.539  | 0.509  | 5.663  | 1.00 | 37.34 | ? | ? | ? | ? | ? | ? | ? | 16 | BZG | B | CM    | 1 |
| ATOM | 302 | N | NN    | . BZG | B | 1 | 4 | ? | 5.264  | 0.119  | 5.947  | 1.00 | 45.16 | ? | ? | ? | ? | ? | ? | ? | 16 | BZG | B | NN    | 1 |
| ATOM | 303 | C | CO    | . BZG | B | 1 | 4 | ? | 5.213  | -1.240 | 5.844  | 1.00 | 37.18 | ? | ? | ? | ? | ? | ? | ? | 16 | BZG | B | CO    | 1 |
| ATOM | 304 | N | NE    | . BZG | B | 1 | 4 | ? | 6.447  | -1.687 | 5.551  | 1.00 | 41.81 | ? | ? | ? | ? | ? | ? | ? | 16 | BZG | B | NE    | 1 |
| ATOM | 305 | C | 'CT'' | . BZG | B | 1 | 4 | ? | 6.866  | -3.092 | 5.296  | 1.00 | 48.18 | ? | ? | ? | ? | ? | ? | ? | 16 | BZG | B | 'CT'' | 1 |



|      |     |   |       |   |     |   |   |   |   |        |        |        |      |       |   |   |   |   |   |   |   |   |    |     |   |       |   |
|------|-----|---|-------|---|-----|---|---|---|---|--------|--------|--------|------|-------|---|---|---|---|---|---|---|---|----|-----|---|-------|---|
| ATOM | 306 | O | 'OS'' | . | BZG | B | 1 | 4 | ? | 6.296  | -3.544 | 4.063  | 1.00 | 50.49 | ? | ? | ? | ? | ? | ? | ? | ? | 16 | BZG | B | 'OS'' | 1 |
| ATOM | 307 | C | 'CP'' | . | BZG | B | 1 | 4 | ? | 6.358  | -4.070 | 6.336  | 1.00 | 51.14 | ? | ? | ? | ? | ? | ? | ? | ? | 16 | BZG | B | 'CP'' | 1 |
| ATOM | 308 | C | 'C5'' | . | BZG | B | 1 | 4 | ? | 4.448  | -5.049 | 3.759  | 1.00 | 55.03 | ? | ? | ? | ? | ? | ? | ? | ? | 16 | BZG | B | 'C5'' | 1 |
| ATOM | 309 | C | 'C4'' | . | BZG | B | 1 | 4 | ? | 5.918  | -4.932 | 4.128  | 1.00 | 54.38 | ? | ? | ? | ? | ? | ? | ? | ? | 16 | BZG | B | 'C4'' | 1 |
| ATOM | 310 | C | 'C3'' | . | BZG | B | 1 | 4 | ? | 6.225  | -5.365 | 5.557  | 1.00 | 49.35 | ? | ? | ? | ? | ? | ? | ? | ? | 16 | BZG | B | 'C3'' | 1 |
| ATOM | 311 | O | 'O3'' | . | BZG | B | 1 | 4 | ? | 7.520  | -5.968 | 5.495  | 1.00 | 53.57 | ? | ? | ? | ? | ? | ? | ? | ? | 16 | BZG | B | 'O3'' | 1 |
| ATOM | 312 | P | P     | . | DA  | B | 1 | 5 | ? | 8.189  | -6.628 | 6.814  | 1.00 | 57.46 | ? | ? | ? | ? | ? | ? | ? | ? | 17 | DA  | B | P     | 1 |
| ATOM | 313 | O | OP1   | . | DA  | B | 1 | 5 | ? | 9.109  | -7.704 | 6.368  | 1.00 | 58.86 | ? | ? | ? | ? | ? | ? | ? | ? | 17 | DA  | B | OP1   | 1 |
| ATOM | 314 | O | OP2   | . | DA  | B | 1 | 5 | ? | 7.101  | -6.947 | 7.780  | 1.00 | 55.69 | ? | ? | ? | ? | ? | ? | ? | ? | 17 | DA  | B | OP2   | 1 |
| ATOM | 315 | O | 'O5'' | . | DA  | B | 1 | 5 | ? | 9.148  | -5.476 | 7.354  | 1.00 | 51.31 | ? | ? | ? | ? | ? | ? | ? | ? | 17 | DA  | B | 'O5'' | 1 |
| ATOM | 316 | C | 'C5'' | . | DA  | B | 1 | 5 | ? | 10.239 | -4.994 | 6.552  | 1.00 | 51.08 | ? | ? | ? | ? | ? | ? | ? | ? | 17 | DA  | B | 'C5'' | 1 |
| ATOM | 317 | C | 'C4'' | . | DA  | B | 1 | 5 | ? | 10.920 | -3.871 | 7.294  | 1.00 | 53.59 | ? | ? | ? | ? | ? | ? | ? | ? | 17 | DA  | B | 'C4'' | 1 |
| ATOM | 318 | O | 'O4'' | . | DA  | B | 1 | 5 | ? | 10.038 | -2.714 | 7.363  | 1.00 | 48.85 | ? | ? | ? | ? | ? | ? | ? | ? | 17 | DA  | B | 'O4'' | 1 |
| ATOM | 319 | C | 'C3'' | . | DA  | B | 1 | 5 | ? | 11.227 | -4.235 | 8.747  | 1.00 | 51.37 | ? | ? | ? | ? | ? | ? | ? | ? | 17 | DA  | B | 'C3'' | 1 |
| ATOM | 320 | O | 'O3'' | . | DA  | B | 1 | 5 | ? | 12.439 | -3.577 | 9.077  | 1.00 | 65.84 | ? | ? | ? | ? | ? | ? | ? | ? | 17 | DA  | B | 'O3'' | 1 |
| ATOM | 321 | C | 'C2'' | . | DA  | B | 1 | 5 | ? | 10.084 | -3.589 | 9.514  | 1.00 | 43.01 | ? | ? | ? | ? | ? | ? | ? | ? | 17 | DA  | B | 'C2'' | 1 |
| ATOM | 322 | C | 'C1'' | . | DA  | B | 1 | 5 | ? | 9.935  | -2.310 | 8.712  | 1.00 | 45.18 | ? | ? | ? | ? | ? | ? | ? | ? | 17 | DA  | B | 'C1'' | 1 |
| ATOM | 323 | N | N9    | . | DA  | B | 1 | 5 | ? | 8.669  | -1.606 | 8.891  | 1.00 | 38.03 | ? | ? | ? | ? | ? | ? | ? | ? | 17 | DA  | B | N9    | 1 |
| ATOM | 324 | C | C8    | . | DA  | B | 1 | 5 | ? | 7.432  | -2.107 | 9.213  | 1.00 | 42.14 | ? | ? | ? | ? | ? | ? | ? | ? | 17 | DA  | B | C8    | 1 |
| ATOM | 325 | N | N7    | . | DA  | B | 1 | 5 | ? | 6.518  | -1.183 | 9.394  | 1.00 | 44.19 | ? | ? | ? | ? | ? | ? | ? | ? | 17 | DA  | B | N7    | 1 |
| ATOM | 326 | C | C5    | . | DA  | B | 1 | 5 | ? | 7.198  | 0.006  | 9.158  | 1.00 | 37.91 | ? | ? | ? | ? | ? | ? | ? | ? | 17 | DA  | B | C5    | 1 |
| ATOM | 327 | C | C6    | . | DA  | B | 1 | 5 | ? | 6.787  | 1.346  | 9.175  | 1.00 | 34.62 | ? | ? | ? | ? | ? | ? | ? | ? | 17 | DA  | B | C6    | 1 |
| ATOM | 328 | N | N6    | . | DA  | B | 1 | 5 | ? | 5.538  | 1.734  | 9.450  | 1.00 | 40.59 | ? | ? | ? | ? | ? | ? | ? | ? | 17 | DA  | B | N6    | 1 |
| ATOM | 329 | N | N1    | . | DA  | B | 1 | 5 | ? | 7.719  | 2.290  | 8.930  | 1.00 | 38.79 | ? | ? | ? | ? | ? | ? | ? | ? | 17 | DA  | B | N1    | 1 |
| ATOM | 330 | C | C2    | . | DA  | B | 1 | 5 | ? | 8.969  | 1.901  | 8.648  | 1.00 | 40.00 | ? | ? | ? | ? | ? | ? | ? | ? | 17 | DA  | B | C2    | 1 |
| ATOM | 331 | N | N3    | . | DA  | B | 1 | 5 | ? | 9.474  | 0.671  | 8.592  | 1.00 | 45.23 | ? | ? | ? | ? | ? | ? | ? | ? | 17 | DA  | B | N3    | 1 |
| ATOM | 332 | C | C4    | . | DA  | B | 1 | 5 | ? | 8.526  | -0.240 | 8.865  | 1.00 | 35.76 | ? | ? | ? | ? | ? | ? | ? | ? | 17 | DA  | B | C4    | 1 |
| ATOM | 333 | P | P     | . | DA  | B | 1 | 6 | ? | 13.626 | -4.397 | 9.688  | 1.00 | 60.35 | ? | ? | ? | ? | ? | ? | ? | ? | 18 | DA  | B | P     | 1 |
| ATOM | 334 | O | OP1   | . | DA  | B | 1 | 6 | ? | 14.221 | -5.214 | 8.602  | 1.00 | 63.82 | ? | ? | ? | ? | ? | ? | ? | ? | 18 | DA  | B | OP1   | 1 |
| ATOM | 335 | O | OP2   | . | DA  | B | 1 | 6 | ? | 13.144 | -5.035 | 10.931 | 1.00 | 49.85 | ? | ? | ? | ? | ? | ? | ? | ? | 18 | DA  | B | OP2   | 1 |
| ATOM | 336 | O | 'O5'' | . | DA  | B | 1 | 6 | ? | 14.622 | -3.248 | 10.144 | 1.00 | 59.82 | ? | ? | ? | ? | ? | ? | ? | ? | 18 | DA  | B | 'O5'' | 1 |
| ATOM | 337 | C | 'C5'' | . | DA  | B | 1 | 6 | ? | 15.222 | -2.375 | 9.182  | 1.00 | 53.72 | ? | ? | ? | ? | ? | ? | ? | ? | 18 | DA  | B | 'C5'' | 1 |
| ATOM | 338 | C | 'C4'' | . | DA  | B | 1 | 6 | ? | 15.373 | -1.007 | 9.798  | 1.00 | 52.59 | ? | ? | ? | ? | ? | ? | ? | ? | 18 | DA  | B | 'C4'' | 1 |
| ATOM | 339 | O | 'O4'' | . | DA  | B | 1 | 6 | ? | 14.075 | -0.384 | 9.913  | 1.00 | 55.38 | ? | ? | ? | ? | ? | ? | ? | ? | 18 | DA  | B | 'O4'' | 1 |
| ATOM | 340 | C | 'C3'' | . | DA  | B | 1 | 6 | ? | 15.965 | -1.026 | 11.205 | 1.00 | 44.97 | ? | ? | ? | ? | ? | ? | ? | ? | 18 | DA  | B | 'C3'' | 1 |
| ATOM | 341 | O | 'O3'' | . | DA  | B | 1 | 6 | ? | 17.114 | -0.188 | 11.173 | 1.00 | 59.93 | ? | ? | ? | ? | ? | ? | ? | ? | 18 | DA  | B | 'O3'' | 1 |
| ATOM | 342 | C | 'C2'' | . | DA  | B | 1 | 6 | ? | 14.828 | -0.567 | 12.111 | 1.00 | 50.88 | ? | ? | ? | ? | ? | ? | ? | ? | 18 | DA  | B | 'C2'' | 1 |

|      |     |   |       |      |   |   |   |   |        |        |        |      |       |   |   |   |   |   |   |   |   |   |   |    |    |   |       |   |
|------|-----|---|-------|------|---|---|---|---|--------|--------|--------|------|-------|---|---|---|---|---|---|---|---|---|---|----|----|---|-------|---|
| ATOM | 343 | C | 'C1'' | . DA | B | 1 | 6 | ? | 13.928 | 0.218  | 11.180 | 1.00 | 45.59 | ? | ? | ? | ? | ? | ? | ? | ? | ? | ? | 18 | DA | B | 'C1'' | 1 |
| ATOM | 344 | N | N9    | . DA | B | 1 | 6 | ? | 12.502 | 0.193  | 11.505 | 1.00 | 41.89 | ? | ? | ? | ? | ? | ? | ? | ? | ? | ? | 18 | DA | B | N9    | 1 |
| ATOM | 345 | C | C8    | . DA | B | 1 | 6 | ? | 11.681 | -0.902 | 11.603 | 1.00 | 35.00 | ? | ? | ? | ? | ? | ? | ? | ? | ? | ? | 18 | DA | B | C8    | 1 |
| ATOM | 346 | N | N7    | . DA | B | 1 | 6 | ? | 10.436 | -0.601 | 11.890 | 1.00 | 40.93 | ? | ? | ? | ? | ? | ? | ? | ? | ? | ? | 18 | DA | B | N7    | 1 |
| ATOM | 347 | C | C5    | . DA | B | 1 | 6 | ? | 10.425 | 0.789  | 11.911 | 1.00 | 39.79 | ? | ? | ? | ? | ? | ? | ? | ? | ? | ? | 18 | DA | B | C5    | 1 |
| ATOM | 348 | C | C6    | . DA | B | 1 | 6 | ? | 9.393  | 1.726  | 12.103 | 1.00 | 41.31 | ? | ? | ? | ? | ? | ? | ? | ? | ? | ? | 18 | DA | B | C6    | 1 |
| ATOM | 349 | N | N6    | . DA | B | 1 | 6 | ? | 8.115  | 1.390  | 12.303 | 1.00 | 35.05 | ? | ? | ? | ? | ? | ? | ? | ? | ? | ? | 18 | DA | B | N6    | 1 |
| ATOM | 350 | N | N1    | . DA | B | 1 | 6 | ? | 9.715  | 3.037  | 12.035 | 1.00 | 37.78 | ? | ? | ? | ? | ? | ? | ? | ? | ? | ? | 18 | DA | B | N1    | 1 |
| ATOM | 351 | C | C2    | . DA | B | 1 | 6 | ? | 10.985 | 3.371  | 11.805 | 1.00 | 39.76 | ? | ? | ? | ? | ? | ? | ? | ? | ? | ? | 18 | DA | B | C2    | 1 |
| ATOM | 352 | N | N3    | . DA | B | 1 | 6 | ? | 12.041 | 2.585  | 11.605 | 1.00 | 44.05 | ? | ? | ? | ? | ? | ? | ? | ? | ? | ? | 18 | DA | B | N3    | 1 |
| ATOM | 353 | C | C4    | . DA | B | 1 | 6 | ? | 11.682 | 1.290  | 11.641 | 1.00 | 39.60 | ? | ? | ? | ? | ? | ? | ? | ? | ? | ? | 18 | DA | B | C4    | 1 |
| ATOM | 354 | P | P     | . DT | B | 1 | 7 | ? | 18.150 | -0.225 | 12.366 | 1.00 | 66.24 | ? | ? | ? | ? | ? | ? | ? | ? | ? | ? | 19 | DT | B | P     | 1 |
| ATOM | 355 | O | OP1   | . DT | B | 1 | 7 | ? | 19.404 | 0.414  | 11.889 | 1.00 | 73.70 | ? | ? | ? | ? | ? | ? | ? | ? | ? | ? | 19 | DT | B | OP1   | 1 |
| ATOM | 356 | O | OP2   | . DT | B | 1 | 7 | ? | 18.168 | -1.604 | 12.915 | 1.00 | 73.00 | ? | ? | ? | ? | ? | ? | ? | ? | ? | ? | 19 | DT | B | OP2   | 1 |
| ATOM | 357 | O | 'O5'' | . DT | B | 1 | 7 | ? | 17.480 | 0.772  | 13.403 | 1.00 | 63.34 | ? | ? | ? | ? | ? | ? | ? | ? | ? | ? | 19 | DT | B | 'O5'' | 1 |
| ATOM | 358 | C | 'C5'' | . DT | B | 1 | 7 | ? | 17.286 | 2.131  | 12.994 | 1.00 | 59.35 | ? | ? | ? | ? | ? | ? | ? | ? | ? | ? | 19 | DT | B | 'C5'' | 1 |
| ATOM | 359 | C | 'C4'' | . DT | B | 1 | 7 | ? | 16.414 | 2.851  | 13.989 | 1.00 | 52.77 | ? | ? | ? | ? | ? | ? | ? | ? | ? | ? | 19 | DT | B | 'C4'' | 1 |
| ATOM | 360 | O | 'O4'' | . DT | B | 1 | 7 | ? | 15.043 | 2.464  | 13.823 | 1.00 | 43.01 | ? | ? | ? | ? | ? | ? | ? | ? | ? | ? | 19 | DT | B | 'O4'' | 1 |
| ATOM | 361 | C | 'C3'' | . DT | B | 1 | 7 | ? | 16.741 | 2.544  | 15.448 | 1.00 | 50.15 | ? | ? | ? | ? | ? | ? | ? | ? | ? | ? | 19 | DT | B | 'C3'' | 1 |
| ATOM | 362 | O | 'O3'' | . DT | B | 1 | 7 | ? | 17.589 | 3.588  | 15.904 | 1.00 | 57.13 | ? | ? | ? | ? | ? | ? | ? | ? | ? | ? | 19 | DT | B | 'O3'' | 1 |
| ATOM | 363 | C | 'C2'' | . DT | B | 1 | 7 | ? | 15.385 | 2.585  | 16.142 | 1.00 | 47.40 | ? | ? | ? | ? | ? | ? | ? | ? | ? | ? | 19 | DT | B | 'C2'' | 1 |
| ATOM | 364 | C | 'C1'' | . DT | B | 1 | 7 | ? | 14.405 | 2.874  | 15.005 | 1.00 | 44.86 | ? | ? | ? | ? | ? | ? | ? | ? | ? | ? | 19 | DT | B | 'C1'' | 1 |
| ATOM | 365 | N | N1    | . DT | B | 1 | 7 | ? | 13.128 | 2.183  | 15.087 | 1.00 | 41.99 | ? | ? | ? | ? | ? | ? | ? | ? | ? | ? | 19 | DT | B | N1    | 1 |
| ATOM | 366 | C | C2    | . DT | B | 1 | 7 | ? | 11.999 | 2.961  | 15.192 | 1.00 | 40.74 | ? | ? | ? | ? | ? | ? | ? | ? | ? | ? | 19 | DT | B | C2    | 1 |
| ATOM | 367 | O | O2    | . DT | B | 1 | 7 | ? | 12.029 | 4.180  | 15.200 | 1.00 | 45.09 | ? | ? | ? | ? | ? | ? | ? | ? | ? | ? | 19 | DT | B | O2    | 1 |
| ATOM | 368 | N | N3    | . DT | B | 1 | 7 | ? | 10.821 | 2.257  | 15.242 | 1.00 | 38.44 | ? | ? | ? | ? | ? | ? | ? | ? | ? | ? | 19 | DT | B | N3    | 1 |
| ATOM | 369 | C | C4    | . DT | B | 1 | 7 | ? | 10.670 | 0.889  | 15.267 | 1.00 | 39.65 | ? | ? | ? | ? | ? | ? | ? | ? | ? | ? | 19 | DT | B | C4    | 1 |
| ATOM | 370 | O | O4    | . DT | B | 1 | 7 | ? | 9.546  | 0.403  | 15.355 | 1.00 | 40.87 | ? | ? | ? | ? | ? | ? | ? | ? | ? | ? | 19 | DT | B | O4    | 1 |
| ATOM | 371 | C | C5    | . DT | B | 1 | 7 | ? | 11.901 | 0.129  | 15.196 | 1.00 | 37.60 | ? | ? | ? | ? | ? | ? | ? | ? | ? | ? | 19 | DT | B | C5    | 1 |
| ATOM | 372 | C | C7    | . DT | B | 1 | 7 | ? | 11.834 | -1.365 | 15.237 | 1.00 | 38.18 | ? | ? | ? | ? | ? | ? | ? | ? | ? | ? | 19 | DT | B | C7    | 1 |
| ATOM | 373 | C | C6    | . DT | B | 1 | 7 | ? | 13.055 | 0.806  | 15.109 | 1.00 | 40.86 | ? | ? | ? | ? | ? | ? | ? | ? | ? | ? | 19 | DT | B | C6    | 1 |
| ATOM | 374 | P | P     | . DT | B | 1 | 8 | ? | 18.294 | 3.480  | 17.302 | 1.00 | 61.96 | ? | ? | ? | ? | ? | ? | ? | ? | ? | ? | 20 | DT | B | P     | 1 |
| ATOM | 375 | O | OP1   | . DT | B | 1 | 8 | ? | 19.496 | 4.353  | 17.267 | 1.00 | 72.95 | ? | ? | ? | ? | ? | ? | ? | ? | ? | ? | 20 | DT | B | OP1   | 1 |
| ATOM | 376 | O | OP2   | . DT | B | 1 | 8 | ? | 18.438 | 2.030  | 17.625 | 1.00 | 58.29 | ? | ? | ? | ? | ? | ? | ? | ? | ? | ? | 20 | DT | B | OP2   | 1 |
| ATOM | 377 | O | 'O5'' | . DT | B | 1 | 8 | ? | 17.227 | 4.175  | 18.257 | 1.00 | 52.32 | ? | ? | ? | ? | ? | ? | ? | ? | ? | ? | 20 | DT | B | 'O5'' | 1 |
| ATOM | 378 | C | 'C5'' | . DT | B | 1 | 8 | ? | 16.699 | 5.464  | 17.926 | 1.00 | 47.16 | ? | ? | ? | ? | ? | ? | ? | ? | ? | ? | 20 | DT | B | 'C5'' | 1 |
| ATOM | 379 | C | 'C4'' | . DT | B | 1 | 8 | ? | 15.636 | 5.844  | 18.927 | 1.00 | 54.14 | ? | ? | ? | ? | ? | ? | ? | ? | ? | ? | 20 | DT | B | 'C4'' | 1 |

|      |     |   |       |   |     |   |   |   |   |        |        |        |      |       |   |   |   |   |   |   |   |   |    |     |   |       |   |
|------|-----|---|-------|---|-----|---|---|---|---|--------|--------|--------|------|-------|---|---|---|---|---|---|---|---|----|-----|---|-------|---|
| ATOM | 380 | O | 'O4'' | . | DT  | B | 1 | 8 | ? | 14.406 | 5.175  | 18.571 | 1.00 | 51.72 | ? | ? | ? | ? | ? | ? | ? | ? | 20 | DT  | B | 'O4'' | 1 |
| ATOM | 381 | C | 'C3'' | . | DT  | B | 1 | 8 | ? | 15.945 | 5.420  | 20.366 | 1.00 | 55.66 | ? | ? | ? | ? | ? | ? | ? | ? | 20 | DT  | B | 'C3'' | 1 |
| ATOM | 382 | O | 'O3'' | . | DT  | B | 1 | 8 | ? | 15.647 | 6.479  | 21.276 | 1.00 | 62.72 | ? | ? | ? | ? | ? | ? | ? | ? | 20 | DT  | B | 'O3'' | 1 |
| ATOM | 383 | C | 'C2'' | . | DT  | B | 1 | 8 | ? | 15.020 | 4.243  | 20.607 | 1.00 | 48.82 | ? | ? | ? | ? | ? | ? | ? | ? | 20 | DT  | B | 'C2'' | 1 |
| ATOM | 384 | C | 'C1'' | . | DT  | B | 1 | 8 | ? | 13.848 | 4.604  | 19.724 | 1.00 | 48.53 | ? | ? | ? | ? | ? | ? | ? | ? | 20 | DT  | B | 'C1'' | 1 |
| ATOM | 385 | N | N1    | . | DT  | B | 1 | 8 | ? | 13.035 | 3.471  | 19.303 | 1.00 | 41.47 | ? | ? | ? | ? | ? | ? | ? | ? | 20 | DT  | B | N1    | 1 |
| ATOM | 386 | C | C2    | . | DT  | B | 1 | 8 | ? | 11.693 | 3.702  | 19.147 | 1.00 | 42.38 | ? | ? | ? | ? | ? | ? | ? | ? | 20 | DT  | B | C2    | 1 |
| ATOM | 387 | O | O2    | . | DT  | B | 1 | 8 | ? | 11.182 | 4.786  | 19.358 | 1.00 | 40.94 | ? | ? | ? | ? | ? | ? | ? | ? | 20 | DT  | B | O2    | 1 |
| ATOM | 388 | N | N3    | . | DT  | B | 1 | 8 | ? | 10.961 | 2.597  | 18.790 | 1.00 | 39.48 | ? | ? | ? | ? | ? | ? | ? | ? | 20 | DT  | B | N3    | 1 |
| ATOM | 389 | C | C4    | . | DT  | B | 1 | 8 | ? | 11.440 | 1.329  | 18.529 | 1.00 | 43.13 | ? | ? | ? | ? | ? | ? | ? | ? | 20 | DT  | B | C4    | 1 |
| ATOM | 390 | O | O4    | . | DT  | B | 1 | 8 | ? | 10.665 | 0.442  | 18.187 | 1.00 | 43.85 | ? | ? | ? | ? | ? | ? | ? | ? | 20 | DT  | B | O4    | 1 |
| ATOM | 391 | C | C5    | . | DT  | B | 1 | 8 | ? | 12.874 | 1.170  | 18.676 | 1.00 | 36.61 | ? | ? | ? | ? | ? | ? | ? | ? | 20 | DT  | B | C5    | 1 |
| ATOM | 392 | C | C7    | . | DT  | B | 1 | 8 | ? | 13.491 | -0.170 | 18.421 | 1.00 | 41.24 | ? | ? | ? | ? | ? | ? | ? | ? | 20 | DT  | B | C7    | 1 |
| ATOM | 393 | C | C6    | . | DT  | B | 1 | 8 | ? | 13.588 | 2.240  | 19.037 | 1.00 | 31.95 | ? | ? | ? | ? | ? | ? | ? | ? | 20 | DT  | B | C6    | 1 |
| ATOM | 394 | O | O1P   | . | D3N | B | 1 | 9 | ? | 17.527 | 5.577  | 22.677 | 1.00 | 57.63 | ? | ? | ? | ? | ? | ? | ? | ? | 21 | D3N | B | O1P   | 1 |
| ATOM | 395 | P | P     | . | D3N | B | 1 | 9 | ? | 16.324 | 6.477  | 22.716 | 1.00 | 73.10 | ? | ? | ? | ? | ? | ? | ? | ? | 21 | D3N | B | P     | 1 |
| ATOM | 396 | O | O2P   | . | D3N | B | 1 | 9 | ? | 16.449 | 7.907  | 23.055 | 1.00 | 71.06 | ? | ? | ? | ? | ? | ? | ? | ? | 21 | D3N | B | O2P   | 1 |
| ATOM | 397 | O | 'O5'' | . | D3N | B | 1 | 9 | ? | 15.191 | 5.843  | 23.617 | 1.00 | 65.54 | ? | ? | ? | ? | ? | ? | ? | ? | 21 | D3N | B | 'O5'' | 1 |
| ATOM | 398 | C | 'C5'' | . | D3N | B | 1 | 9 | ? | 15.589 | 5.167  | 24.785 | 1.00 | 68.44 | ? | ? | ? | ? | ? | ? | ? | ? | 21 | D3N | B | 'C5'' | 1 |
| ATOM | 399 | C | 'C4'' | . | D3N | B | 1 | 9 | ? | 14.459 | 5.106  | 25.773 | 1.00 | 63.43 | ? | ? | ? | ? | ? | ? | ? | ? | 21 | D3N | B | 'C4'' | 1 |
| ATOM | 400 | O | 'O4'' | . | D3N | B | 1 | 9 | ? | 13.681 | 4.031  | 25.359 | 1.00 | 56.75 | ? | ? | ? | ? | ? | ? | ? | ? | 21 | D3N | B | 'O4'' | 1 |
| ATOM | 401 | C | 'C3'' | . | D3N | B | 1 | 9 | ? | 14.935 | 4.721  | 27.123 | 1.00 | 63.88 | ? | ? | ? | ? | ? | ? | ? | ? | 21 | D3N | B | 'C3'' | 1 |
| ATOM | 402 | O | 'O3'' | . | D3N | B | 1 | 9 | ? | 15.133 | 5.944  | 27.827 | 1.00 | 67.07 | ? | ? | ? | ? | ? | ? | ? | ? | 21 | D3N | B | 'O3'' | 1 |
| ATOM | 403 | C | 'C2'' | . | D3N | B | 1 | 9 | ? | 13.814 | 3.859  | 27.696 | 1.00 | 56.92 | ? | ? | ? | ? | ? | ? | ? | ? | 21 | D3N | B | 'C2'' | 1 |
| ATOM | 404 | C | 'C1'' | . | D3N | B | 1 | 9 | ? | 12.920 | 3.605  | 26.492 | 1.00 | 52.83 | ? | ? | ? | ? | ? | ? | ? | ? | 21 | D3N | B | 'C1'' | 1 |
| ATOM | 405 | N | N1    | . | D3N | B | 1 | 9 | ? | 12.484 | 2.276  | 26.132 | 1.00 | 47.27 | ? | ? | ? | ? | ? | ? | ? | ? | 21 | D3N | B | N1    | 1 |
| ATOM | 406 | C | C2    | . | D3N | B | 1 | 9 | ? | 13.435 | 1.323  | 25.912 | 1.00 | 47.67 | ? | ? | ? | ? | ? | ? | ? | ? | 21 | D3N | B | C2    | 1 |
| ATOM | 407 | O | O2    | . | D3N | B | 1 | 9 | ? | 14.627 | 1.553  | 26.095 | 1.00 | 53.65 | ? | ? | ? | ? | ? | ? | ? | ? | 21 | D3N | B | O2    | 1 |
| ATOM | 408 | N | N3    | . | D3N | B | 1 | 9 | ? | 13.009 | 0.096  | 25.555 | 1.00 | 43.83 | ? | ? | ? | ? | ? | ? | ? | ? | 21 | D3N | B | N3    | 1 |
| ATOM | 409 | C | C4    | . | D3N | B | 1 | 9 | ? | 11.663 | -0.223 | 25.295 | 1.00 | 39.23 | ? | ? | ? | ? | ? | ? | ? | ? | 21 | D3N | B | C4    | 1 |
| ATOM | 410 | C | C5    | . | D3N | B | 1 | 9 | ? | 10.696 | 0.762  | 25.488 | 1.00 | 44.29 | ? | ? | ? | ? | ? | ? | ? | ? | 21 | D3N | B | C5    | 1 |
| ATOM | 411 | C | C6    | . | D3N | B | 1 | 9 | ? | 11.081 | 2.040  | 25.924 | 1.00 | 42.62 | ? | ? | ? | ? | ? | ? | ? | ? | 21 | D3N | B | C6    | 1 |
| ATOM | 412 | C | C7    | . | D3N | B | 1 | 9 | ? | 10.111 | 2.990  | 26.145 | 1.00 | 52.13 | ? | ? | ? | ? | ? | ? | ? | ? | 21 | D3N | B | C7    | 1 |
| ATOM | 413 | C | C8    | . | D3N | B | 1 | 9 | ? | 8.771  | 2.646  | 25.913 | 1.00 | 39.74 | ? | ? | ? | ? | ? | ? | ? | ? | 21 | D3N | B | C8    | 1 |
| ATOM | 414 | C | C9    | . | D3N | B | 1 | 9 | ? | 8.378  | 1.426  | 25.500 | 1.00 | 47.35 | ? | ? | ? | ? | ? | ? | ? | ? | 21 | D3N | B | C9    | 1 |
| ATOM | 415 | C | C10   | . | D3N | B | 1 | 9 | ? | 9.330  | 0.451  | 25.258 | 1.00 | 41.01 | ? | ? | ? | ? | ? | ? | ? | ? | 21 | D3N | B | C10   | 1 |
| ATOM | 416 | C | C11   | . | D3N | B | 1 | 9 | ? | 8.992  | -0.837 | 24.848 | 1.00 | 43.98 | ? | ? | ? | ? | ? | ? | ? | ? | 21 | D3N | B | C11   | 1 |

|      |     |   |       |   |     |   |   |    |   |        |        |        |      |       |   |   |   |   |   |   |   |   |    |     |   |       |   |
|------|-----|---|-------|---|-----|---|---|----|---|--------|--------|--------|------|-------|---|---|---|---|---|---|---|---|----|-----|---|-------|---|
| ATOM | 417 | C | C12   | . | D3N | B | 1 | 9  | ? | 9.952  | -1.768 | 24.635 | 1.00 | 45.05 | ? | ? | ? | ? | ? | ? | ? | ? | 21 | D3N | B | C12   | 1 |
| ATOM | 418 | C | C13   | . | D3N | B | 1 | 9  | ? | 11.312 | -1.482 | 24.872 | 1.00 | 47.17 | ? | ? | ? | ? | ? | ? | ? | ? | 21 | D3N | B | C13   | 1 |
| ATOM | 419 | P | P     | . | DG  | B | 1 | 10 | ? | 15.736 | 5.916  | 29.307 | 1.00 | 60.70 | ? | ? | ? | ? | ? | ? | ? | ? | 22 | DG  | B | P     | 1 |
| ATOM | 420 | O | OP1   | . | DG  | B | 1 | 10 | ? | 16.433 | 7.208  | 29.532 | 1.00 | 63.59 | ? | ? | ? | ? | ? | ? | ? | ? | 22 | DG  | B | OP1   | 1 |
| ATOM | 421 | O | OP2   | . | DG  | B | 1 | 10 | ? | 16.495 | 4.640  | 29.465 | 1.00 | 51.49 | ? | ? | ? | ? | ? | ? | ? | ? | 22 | DG  | B | OP2   | 1 |
| ATOM | 422 | O | 'O5'' | . | DG  | B | 1 | 10 | ? | 14.420 | 5.963  | 30.208 | 1.00 | 56.71 | ? | ? | ? | ? | ? | ? | ? | ? | 22 | DG  | B | 'O5'' | 1 |
| ATOM | 423 | C | 'C5'' | . | DG  | B | 1 | 10 | ? | 13.283 | 6.789  | 29.854 | 1.00 | 44.99 | ? | ? | ? | ? | ? | ? | ? | ? | 22 | DG  | B | 'C5'' | 1 |
| ATOM | 424 | C | 'C4'' | . | DG  | B | 1 | 10 | ? | 12.025 | 6.262  | 30.509 | 1.00 | 50.00 | ? | ? | ? | ? | ? | ? | ? | ? | 22 | DG  | B | 'C4'' | 1 |
| ATOM | 425 | O | 'O4'' | . | DG  | B | 1 | 10 | ? | 11.708 | 4.952  | 29.984 | 1.00 | 42.89 | ? | ? | ? | ? | ? | ? | ? | ? | 22 | DG  | B | 'O4'' | 1 |
| ATOM | 426 | C | 'C3'' | . | DG  | B | 1 | 10 | ? | 12.105 | 6.068  | 32.024 | 1.00 | 48.07 | ? | ? | ? | ? | ? | ? | ? | ? | 22 | DG  | B | 'C3'' | 1 |
| ATOM | 427 | O | 'O3'' | . | DG  | B | 1 | 10 | ? | 10.760 | 6.110  | 32.488 | 1.00 | 50.84 | ? | ? | ? | ? | ? | ? | ? | ? | 22 | DG  | B | 'O3'' | 1 |
| ATOM | 428 | C | 'C2'' | . | DG  | B | 1 | 10 | ? | 12.570 | 4.634  | 32.149 | 1.00 | 41.22 | ? | ? | ? | ? | ? | ? | ? | ? | 22 | DG  | B | 'C2'' | 1 |
| ATOM | 429 | C | 'C1'' | . | DG  | B | 1 | 10 | ? | 11.752 | 3.990  | 31.034 | 1.00 | 41.10 | ? | ? | ? | ? | ? | ? | ? | ? | 22 | DG  | B | 'C1'' | 1 |
| ATOM | 430 | N | N9    | . | DG  | B | 1 | 10 | ? | 12.282 | 2.747  | 30.485 | 1.00 | 35.88 | ? | ? | ? | ? | ? | ? | ? | ? | 22 | DG  | B | N9    | 1 |
| ATOM | 431 | C | C8    | . | DG  | B | 1 | 10 | ? | 13.594 | 2.339  | 30.459 | 1.00 | 41.27 | ? | ? | ? | ? | ? | ? | ? | ? | 22 | DG  | B | C8    | 1 |
| ATOM | 432 | N | N7    | . | DG  | B | 1 | 10 | ? | 13.753 | 1.160  | 29.926 | 1.00 | 35.66 | ? | ? | ? | ? | ? | ? | ? | ? | 22 | DG  | B | N7    | 1 |
| ATOM | 433 | C | C5    | . | DG  | B | 1 | 10 | ? | 12.468 | 0.765  | 29.576 | 1.00 | 38.68 | ? | ? | ? | ? | ? | ? | ? | ? | 22 | DG  | B | C5    | 1 |
| ATOM | 434 | C | C6    | . | DG  | B | 1 | 10 | ? | 12.009 | -0.426 | 28.970 | 1.00 | 36.57 | ? | ? | ? | ? | ? | ? | ? | ? | 22 | DG  | B | C6    | 1 |
| ATOM | 435 | O | O6    | . | DG  | B | 1 | 10 | ? | 12.660 | -1.408 | 28.615 | 1.00 | 38.62 | ? | ? | ? | ? | ? | ? | ? | ? | 22 | DG  | B | O6    | 1 |
| ATOM | 436 | N | N1    | . | DG  | B | 1 | 10 | ? | 10.636 | -0.396 | 28.759 | 1.00 | 32.06 | ? | ? | ? | ? | ? | ? | ? | ? | 22 | DG  | B | N1    | 1 |
| ATOM | 437 | C | C2    | . | DG  | B | 1 | 10 | ? | 9.801  | 0.614  | 29.146 | 1.00 | 37.35 | ? | ? | ? | ? | ? | ? | ? | ? | 22 | DG  | B | C2    | 1 |
| ATOM | 438 | N | N2    | . | DG  | B | 1 | 10 | ? | 8.497  | 0.408  | 28.941 | 1.00 | 33.23 | ? | ? | ? | ? | ? | ? | ? | ? | 22 | DG  | B | N2    | 1 |
| ATOM | 439 | N | N3    | . | DG  | B | 1 | 10 | ? | 10.210 | 1.716  | 29.751 | 1.00 | 37.31 | ? | ? | ? | ? | ? | ? | ? | ? | 22 | DG  | B | N3    | 1 |
| ATOM | 440 | C | C4    | . | DG  | B | 1 | 10 | ? | 11.553 | 1.741  | 29.897 | 1.00 | 35.81 | ? | ? | ? | ? | ? | ? | ? | ? | 22 | DG  | B | C4    | 1 |
| ATOM | 441 | P | P     | . | DC  | B | 1 | 11 | ? | 10.442 | 6.622  | 33.947 | 1.00 | 54.63 | ? | ? | ? | ? | ? | ? | ? | ? | 23 | DC  | B | P     | 1 |
| ATOM | 442 | O | OP1   | . | DC  | B | 1 | 11 | ? | 10.081 | 8.062  | 33.835 | 1.00 | 72.54 | ? | ? | ? | ? | ? | ? | ? | ? | 23 | DC  | B | OP1   | 1 |
| ATOM | 443 | O | OP2   | . | DC  | B | 1 | 11 | ? | 11.572 | 6.234  | 34.816 | 1.00 | 46.04 | ? | ? | ? | ? | ? | ? | ? | ? | 23 | DC  | B | OP2   | 1 |
| ATOM | 444 | O | 'O5'' | . | DC  | B | 1 | 11 | ? | 9.071  | 5.874  | 34.286 | 1.00 | 50.89 | ? | ? | ? | ? | ? | ? | ? | ? | 23 | DC  | B | 'O5'' | 1 |
| ATOM | 445 | C | 'C5'' | . | DC  | B | 1 | 11 | ? | 7.872  | 6.214  | 33.569 | 1.00 | 44.12 | ? | ? | ? | ? | ? | ? | ? | ? | 23 | DC  | B | 'C5'' | 1 |
| ATOM | 446 | C | 'C4'' | . | DC  | B | 1 | 11 | ? | 6.937  | 5.029  | 33.482 | 1.00 | 43.81 | ? | ? | ? | ? | ? | ? | ? | ? | 23 | DC  | B | 'C4'' | 1 |
| ATOM | 447 | O | 'O4'' | . | DC  | B | 1 | 11 | ? | 7.576  | 3.958  | 32.740 | 1.00 | 42.06 | ? | ? | ? | ? | ? | ? | ? | ? | 23 | DC  | B | 'O4'' | 1 |
| ATOM | 448 | C | 'C3'' | . | DC  | B | 1 | 11 | ? | 6.528  | 4.432  | 34.832 | 1.00 | 38.81 | ? | ? | ? | ? | ? | ? | ? | ? | 23 | DC  | B | 'C3'' | 1 |
| ATOM | 449 | O | 'O3'' | . | DC  | B | 1 | 11 | ? | 5.132  | 4.149  | 34.847 | 1.00 | 45.37 | ? | ? | ? | ? | ? | ? | ? | ? | 23 | DC  | B | 'O3'' | 1 |
| ATOM | 450 | C | 'C2'' | . | DC  | B | 1 | 11 | ? | 7.300  | 3.124  | 34.901 | 1.00 | 40.79 | ? | ? | ? | ? | ? | ? | ? | ? | 23 | DC  | B | 'C2'' | 1 |
| ATOM | 451 | C | 'C1'' | . | DC  | B | 1 | 11 | ? | 7.379  | 2.736  | 33.434 | 1.00 | 33.88 | ? | ? | ? | ? | ? | ? | ? | ? | 23 | DC  | B | 'C1'' | 1 |
| ATOM | 452 | N | N1    | . | DC  | B | 1 | 11 | ? | 8.504  | 1.846  | 33.120 | 1.00 | 36.40 | ? | ? | ? | ? | ? | ? | ? | ? | 23 | DC  | B | N1    | 1 |
| ATOM | 453 | C | C2    | . | DC  | B | 1 | 11 | ? | 8.272  | 0.685  | 32.369 | 1.00 | 32.79 | ? | ? | ? | ? | ? | ? | ? | ? | 23 | DC  | B | C2    | 1 |

|        |     |   |       |   |     |   |   |    |   |        |        |        |      |       |   |   |   |   |   |   |   |   |     |     |   |       |   |
|--------|-----|---|-------|---|-----|---|---|----|---|--------|--------|--------|------|-------|---|---|---|---|---|---|---|---|-----|-----|---|-------|---|
| ATOM   | 454 | O | O2    | . | DC  | B | 1 | 11 | ? | 7.131  | 0.479  | 31.908 | 1.00 | 36.07 | ? | ? | ? | ? | ? | ? | ? | ? | 23  | DC  | B | O2    | 1 |
| ATOM   | 455 | N | N3    | . | DC  | B | 1 | 11 | ? | 9.293  | -0.184 | 32.167 | 1.00 | 30.32 | ? | ? | ? | ? | ? | ? | ? | ? | 23  | DC  | B | N3    | 1 |
| ATOM   | 456 | C | C4    | . | DC  | B | 1 | 11 | ? | 10.503 | 0.081  | 32.671 | 1.00 | 32.96 | ? | ? | ? | ? | ? | ? | ? | ? | 23  | DC  | B | C4    | 1 |
| ATOM   | 457 | N | N4    | . | DC  | B | 1 | 11 | ? | 11.472 | -0.815 | 32.470 | 1.00 | 32.29 | ? | ? | ? | ? | ? | ? | ? | ? | 23  | DC  | B | N4    | 1 |
| ATOM   | 458 | C | C5    | . | DC  | B | 1 | 11 | ? | 10.777 | 1.286  | 33.385 | 1.00 | 32.52 | ? | ? | ? | ? | ? | ? | ? | ? | 23  | DC  | B | C5    | 1 |
| ATOM   | 459 | C | C6    | . | DC  | B | 1 | 11 | ? | 9.753  | 2.117  | 33.606 | 1.00 | 37.44 | ? | ? | ? | ? | ? | ? | ? | ? | 23  | DC  | B | C6    | 1 |
| ATOM   | 460 | P | P     | . | DG  | B | 1 | 12 | ? | 4.277  | 4.492  | 36.173 | 1.00 | 52.39 | ? | ? | ? | ? | ? | ? | ? | ? | 24  | DG  | B | P     | 1 |
| ATOM   | 461 | O | OP1   | . | DG  | B | 1 | 12 | ? | 2.829  | 4.210  | 35.898 | 1.00 | 51.58 | ? | ? | ? | ? | ? | ? | ? | ? | 24  | DG  | B | OP1   | 1 |
| ATOM   | 462 | O | OP2   | . | DG  | B | 1 | 12 | ? | 4.739  | 5.811  | 36.678 | 1.00 | 48.36 | ? | ? | ? | ? | ? | ? | ? | ? | 24  | DG  | B | OP2   | 1 |
| ATOM   | 463 | O | 'O5'' | . | DG  | B | 1 | 12 | ? | 4.756  | 3.384  | 37.209 | 1.00 | 46.27 | ? | ? | ? | ? | ? | ? | ? | ? | 24  | DG  | B | 'O5'' | 1 |
| ATOM   | 464 | C | 'C5'' | . | DG  | B | 1 | 12 | ? | 4.451  | 2.002  | 36.974 | 1.00 | 44.58 | ? | ? | ? | ? | ? | ? | ? | ? | 24  | DG  | B | 'C5'' | 1 |
| ATOM   | 465 | C | 'C4'' | . | DG  | B | 1 | 12 | ? | 5.053  | 1.193  | 38.090 | 1.00 | 39.93 | ? | ? | ? | ? | ? | ? | ? | ? | 24  | DG  | B | 'C4'' | 1 |
| ATOM   | 466 | O | 'O4'' | . | DG  | B | 1 | 12 | ? | 6.494  | 1.319  | 38.004 | 1.00 | 36.23 | ? | ? | ? | ? | ? | ? | ? | ? | 24  | DG  | B | 'O4'' | 1 |
| ATOM   | 467 | C | 'C3'' | . | DG  | B | 1 | 12 | ? | 4.673  | 1.705  | 39.476 | 1.00 | 41.18 | ? | ? | ? | ? | ? | ? | ? | ? | 24  | DG  | B | 'C3'' | 1 |
| ATOM   | 468 | O | 'O3'' | . | DG  | B | 1 | 12 | ? | 3.540  | 0.965  | 39.948 | 1.00 | 45.43 | ? | ? | ? | ? | ? | ? | ? | ? | 24  | DG  | B | 'O3'' | 1 |
| ATOM   | 469 | C | 'C2'' | . | DG  | B | 1 | 12 | ? | 5.937  | 1.493  | 40.281 | 1.00 | 44.61 | ? | ? | ? | ? | ? | ? | ? | ? | 24  | DG  | B | 'C2'' | 1 |
| ATOM   | 470 | C | 'C1'' | . | DG  | B | 1 | 12 | ? | 7.030  | 1.711  | 39.250 | 1.00 | 39.64 | ? | ? | ? | ? | ? | ? | ? | ? | 24  | DG  | B | 'C1'' | 1 |
| ATOM   | 471 | N | N9    | . | DG  | B | 1 | 12 | ? | 7.442  | 3.094  | 39.113 | 1.00 | 44.84 | ? | ? | ? | ? | ? | ? | ? | ? | 24  | DG  | B | N9    | 1 |
| ATOM   | 472 | C | C8    | . | DG  | B | 1 | 12 | ? | 6.712  | 4.200  | 39.471 | 1.00 | 50.34 | ? | ? | ? | ? | ? | ? | ? | ? | 24  | DG  | B | C8    | 1 |
| ATOM   | 473 | N | N7    | . | DG  | B | 1 | 12 | ? | 7.292  | 5.323  | 39.143 | 1.00 | 46.30 | ? | ? | ? | ? | ? | ? | ? | ? | 24  | DG  | B | N7    | 1 |
| ATOM   | 474 | C | C5    | . | DG  | B | 1 | 12 | ? | 8.422  | 4.933  | 38.443 | 1.00 | 46.08 | ? | ? | ? | ? | ? | ? | ? | ? | 24  | DG  | B | C5    | 1 |
| ATOM   | 475 | C | C6    | . | DG  | B | 1 | 12 | ? | 9.446  | 5.712  | 37.846 | 1.00 | 53.78 | ? | ? | ? | ? | ? | ? | ? | ? | 24  | DG  | B | C6    | 1 |
| ATOM   | 476 | O | O6    | . | DG  | B | 1 | 12 | ? | 9.530  | 6.948  | 37.769 | 1.00 | 50.57 | ? | ? | ? | ? | ? | ? | ? | ? | 24  | DG  | B | O6    | 1 |
| ATOM   | 477 | N | N1    | . | DG  | B | 1 | 12 | ? | 10.419 | 4.908  | 37.254 | 1.00 | 42.62 | ? | ? | ? | ? | ? | ? | ? | ? | 24  | DG  | B | N1    | 1 |
| ATOM   | 478 | C | C2    | . | DG  | B | 1 | 12 | ? | 10.434 | 3.531  | 37.278 | 1.00 | 42.89 | ? | ? | ? | ? | ? | ? | ? | ? | 24  | DG  | B | C2    | 1 |
| ATOM   | 479 | N | N2    | . | DG  | B | 1 | 12 | ? | 11.496 | 2.933  | 36.700 | 1.00 | 37.64 | ? | ? | ? | ? | ? | ? | ? | ? | 24  | DG  | B | N2    | 1 |
| ATOM   | 480 | N | N3    | . | DG  | B | 1 | 12 | ? | 9.495  | 2.796  | 37.851 | 1.00 | 42.44 | ? | ? | ? | ? | ? | ? | ? | ? | 24  | DG  | B | N3    | 1 |
| ATOM   | 481 | C | C4    | . | DG  | B | 1 | 12 | ? | 8.524  | 3.556  | 38.405 | 1.00 | 45.36 | ? | ? | ? | ? | ? | ? | ? | ? | 24  | DG  | B | C4    | 1 |
| HETATM | 482 | N | N1    | . | SPM | C | 2 | .  | ? | 15.307 | -2.224 | 30.707 | 0.50 | 45.16 | ? | ? | ? | ? | ? | ? | ? | ? | 101 | SPM | A | N1    | 1 |
| HETATM | 483 | C | C2    | . | SPM | C | 2 | .  | ? | 14.648 | -3.505 | 30.906 | 1.00 | 50.52 | ? | ? | ? | ? | ? | ? | ? | ? | 101 | SPM | A | C2    | 1 |
| HETATM | 484 | C | C3    | . | SPM | C | 2 | .  | ? | 14.177 | -3.681 | 32.355 | 1.00 | 49.96 | ? | ? | ? | ? | ? | ? | ? | ? | 101 | SPM | A | C3    | 1 |
| HETATM | 485 | C | C4    | . | SPM | C | 2 | .  | ? | 13.198 | -4.830 | 32.413 | 1.00 | 46.18 | ? | ? | ? | ? | ? | ? | ? | ? | 101 | SPM | A | C4    | 1 |
| HETATM | 486 | N | N5    | . | SPM | C | 2 | .  | ? | 12.876 | -5.334 | 33.745 | 1.00 | 49.66 | ? | ? | ? | ? | ? | ? | ? | ? | 101 | SPM | A | N5    | 1 |
| HETATM | 487 | C | C6    | . | SPM | C | 2 | .  | ? | 11.836 | -6.363 | 33.800 | 1.00 | 40.82 | ? | ? | ? | ? | ? | ? | ? | ? | 101 | SPM | A | C6    | 1 |
| HETATM | 488 | C | C7    | . | SPM | C | 2 | .  | ? | 11.700 | -6.958 | 35.173 | 1.00 | 44.69 | ? | ? | ? | ? | ? | ? | ? | ? | 101 | SPM | A | C7    | 1 |
| HETATM | 489 | C | C8    | . | SPM | C | 2 | .  | ? | 10.292 | -7.489 | 35.304 | 1.00 | 45.41 | ? | ? | ? | ? | ? | ? | ? | ? | 101 | SPM | A | C8    | 1 |
| HETATM | 490 | C | C9    | . | SPM | C | 2 | .  | ? | 10.370 | -8.593 | 36.328 | 1.00 | 39.65 | ? | ? | ? | ? | ? | ? | ? | ? | 101 | SPM | A | C9    | 1 |

|        |     |    |     |   |     |   |   |   |   |        |         |         |      |       |   |   |   |   |   |   |   |   |   |   |     |     |   |     |   |
|--------|-----|----|-----|---|-----|---|---|---|---|--------|---------|---------|------|-------|---|---|---|---|---|---|---|---|---|---|-----|-----|---|-----|---|
| HETATM | 491 | N  | N10 | . | SPM | C | 2 | . | ? | 9.328  | -8.480  | 37.308  | 1.00 | 48.73 | ? | ? | ? | ? | ? | ? | ? | ? | ? | ? | 101 | SPM | A | N10 | 1 |
| HETATM | 492 | C  | C11 | . | SPM | C | 2 | . | ? | 8.275  | -9.514  | 37.339  | 1.00 | 42.36 | ? | ? | ? | ? | ? | ? | ? | ? | ? | ? | 101 | SPM | A | C11 | 1 |
| HETATM | 493 | C  | C12 | . | SPM | C | 2 | . | ? | 8.417  | -10.350 | 38.617  | 1.00 | 40.48 | ? | ? | ? | ? | ? | ? | ? | ? | ? | ? | 101 | SPM | A | C12 | 1 |
| HETATM | 494 | C  | C13 | . | SPM | C | 2 | . | ? | 7.395  | -11.529 | 38.711  | 1.00 | 36.10 | ? | ? | ? | ? | ? | ? | ? | ? | ? | ? | 101 | SPM | A | C13 | 1 |
| HETATM | 495 | N  | N14 | . | SPM | C | 2 | . | ? | 7.319  | -12.113 | 37.413  | 1.00 | 26.41 | ? | ? | ? | ? | ? | ? | ? | ? | ? | ? | 101 | SPM | A | N14 | 1 |
| HETATM | 496 | SR | SR  | . | SR  | D | 3 | . | ? | 15.511 | 4.253   | -10.211 | 1.00 | 80.43 | ? | ? | ? | ? | ? | ? | ? | ? | ? | ? | 102 | SR  | A | SR  | 1 |
| HETATM | 497 | O  | O   | . | HOH | E | 4 | . | ? | 5.745  | 10.707  | 7.973   | 1.00 | 50.57 | ? | ? | ? | ? | ? | ? | ? | ? | ? | ? | 201 | HOH | A | O   | 1 |
| HETATM | 498 | O  | O   | . | HOH | E | 4 | . | ? | 3.981  | 2.092   | 12.526  | 1.00 | 55.74 | ? | ? | ? | ? | ? | ? | ? | ? | ? | ? | 202 | HOH | A | O   | 1 |
| HETATM | 499 | O  | O   | . | HOH | E | 4 | . | ? | 5.535  | 7.189   | -5.997  | 1.00 | 37.30 | ? | ? | ? | ? | ? | ? | ? | ? | ? | ? | 203 | HOH | A | O   | 1 |
| HETATM | 500 | O  | O   | . | HOH | E | 4 | . | ? | 5.857  | 10.607  | 2.957   | 1.00 | 39.96 | ? | ? | ? | ? | ? | ? | ? | ? | ? | ? | 204 | HOH | A | O   | 1 |
| HETATM | 501 | O  | O   | . | HOH | E | 4 | . | ? | 16.122 | -0.073  | -7.306  | 1.00 | 76.18 | ? | ? | ? | ? | ? | ? | ? | ? | ? | ? | 205 | HOH | A | O   | 1 |
| HETATM | 502 | O  | O   | . | HOH | E | 4 | . | ? | 12.456 | -9.842  | 29.587  | 0.50 | 39.91 | ? | ? | ? | ? | ? | ? | ? | ? | ? | ? | 206 | HOH | A | O   | 1 |
| HETATM | 503 | O  | O   | . | HOH | E | 4 | . | ? | 15.126 | 0.991   | -11.310 | 1.00 | 64.27 | ? | ? | ? | ? | ? | ? | ? | ? | ? | ? | 207 | HOH | A | O   | 1 |
| HETATM | 504 | O  | O   | . | HOH | E | 4 | . | ? | 11.936 | -2.931  | -12.948 | 1.00 | 43.14 | ? | ? | ? | ? | ? | ? | ? | ? | ? | ? | 208 | HOH | A | O   | 1 |
| HETATM | 505 | O  | O   | . | HOH | E | 4 | . | ? | 16.727 | -3.172  | -8.920  | 1.00 | 68.21 | ? | ? | ? | ? | ? | ? | ? | ? | ? | ? | 209 | HOH | A | O   | 1 |
| HETATM | 506 | O  | O   | . | HOH | E | 4 | . | ? | 13.771 | 10.608  | -3.551  | 0.50 | 32.95 | ? | ? | ? | ? | ? | ? | ? | ? | ? | ? | 210 | HOH | A | O   | 1 |
| HETATM | 507 | O  | O   | . | HOH | E | 4 | . | ? | 9.441  | 1.770   | -2.007  | 1.00 | 36.92 | ? | ? | ? | ? | ? | ? | ? | ? | ? | ? | 211 | HOH | A | O   | 1 |
| HETATM | 508 | O  | O   | . | HOH | E | 4 | . | ? | 9.916  | -4.279  | -14.180 | 1.00 | 39.00 | ? | ? | ? | ? | ? | ? | ? | ? | ? | ? | 212 | HOH | A | O   | 1 |
| HETATM | 509 | O  | O   | . | HOH | E | 4 | . | ? | 5.425  | -5.959  | -10.092 | 1.00 | 56.75 | ? | ? | ? | ? | ? | ? | ? | ? | ? | ? | 213 | HOH | A | O   | 1 |
| HETATM | 510 | O  | O   | . | HOH | E | 4 | . | ? | 6.736  | 11.394  | 5.248   | 0.50 | 34.77 | ? | ? | ? | ? | ? | ? | ? | ? | ? | ? | 214 | HOH | A | O   | 1 |
| HETATM | 511 | O  | O   | . | HOH | E | 4 | . | ? | 11.867 | -15.768 | 30.801  | 1.00 | 47.55 | ? | ? | ? | ? | ? | ? | ? | ? | ? | ? | 215 | HOH | A | O   | 1 |
| HETATM | 512 | O  | O   | . | HOH | E | 4 | . | ? | 14.392 | -5.303  | 36.717  | 0.50 | 36.19 | ? | ? | ? | ? | ? | ? | ? | ? | ? | ? | 216 | HOH | A | O   | 1 |
| HETATM | 513 | O  | O   | . | HOH | E | 4 | . | ? | 3.012  | -10.254 | 22.862  | 1.00 | 67.16 | ? | ? | ? | ? | ? | ? | ? | ? | ? | ? | 217 | HOH | A | O   | 1 |
| HETATM | 514 | O  | O   | . | HOH | E | 4 | . | ? | 13.213 | 9.047   | -5.011  | 0.50 | 43.01 | ? | ? | ? | ? | ? | ? | ? | ? | ? | ? | 218 | HOH | A | O   | 1 |
| HETATM | 515 | O  | O   | . | HOH | E | 4 | . | ? | -2.568 | -2.294  | 17.282  | 0.50 | 44.49 | ? | ? | ? | ? | ? | ? | ? | ? | ? | ? | 219 | HOH | A | O   | 1 |
| HETATM | 516 | O  | O   | . | HOH | E | 4 | . | ? | 10.725 | -14.748 | 28.779  | 0.50 | 39.46 | ? | ? | ? | ? | ? | ? | ? | ? | ? | ? | 220 | HOH | A | O   | 1 |
| HETATM | 517 | O  | O   | . | HOH | E | 4 | . | ? | 15.703 | 9.836   | -2.496  | 0.50 | 31.11 | ? | ? | ? | ? | ? | ? | ? | ? | ? | ? | 221 | HOH | A | O   | 1 |
| HETATM | 518 | O  | O   | . | HOH | E | 4 | . | ? | 9.346  | 8.423   | 16.634  | 1.00 | 52.47 | ? | ? | ? | ? | ? | ? | ? | ? | ? | ? | 222 | HOH | A | O   | 1 |
| HETATM | 519 | O  | O   | . | HOH | E | 4 | . | ? | 11.510 | 1.193   | -0.164  | 0.50 | 40.92 | ? | ? | ? | ? | ? | ? | ? | ? | ? | ? | 223 | HOH | A | O   | 1 |
| HETATM | 520 | O  | O   | . | HOH | E | 4 | . | ? | 12.332 | 12.804  | -0.232  | 1.00 | 59.02 | ? | ? | ? | ? | ? | ? | ? | ? | ? | ? | 224 | HOH | A | O   | 1 |
| HETATM | 521 | O  | O   | . | HOH | E | 4 | . | ? | 14.811 | -18.153 | 31.387  | 1.00 | 54.50 | ? | ? | ? | ? | ? | ? | ? | ? | ? | ? | 225 | HOH | A | O   | 1 |
| HETATM | 522 | O  | O   | . | HOH | E | 4 | . | ? | 12.781 | -17.856 | 31.806  | 1.00 | 47.82 | ? | ? | ? | ? | ? | ? | ? | ? | ? | ? | 226 | HOH | A | O   | 1 |
| HETATM | 523 | O  | O   | . | HOH | E | 4 | . | ? | 1.224  | 6.114   | 15.685  | 1.00 | 60.25 | ? | ? | ? | ? | ? | ? | ? | ? | ? | ? | 227 | HOH | A | O   | 1 |
| HETATM | 524 | O  | O   | . | HOH | E | 4 | . | ? | 10.603 | 6.919   | -7.970  | 1.00 | 37.70 | ? | ? | ? | ? | ? | ? | ? | ? | ? | ? | 228 | HOH | A | O   | 1 |
| HETATM | 525 | O  | O   | . | HOH | F | 4 | . | ? | -0.922 | 0.065   | -5.369  | 1.00 | 42.62 | ? | ? | ? | ? | ? | ? | ? | ? | ? | ? | 101 | HOH | B | O   | 1 |
| HETATM | 526 | O  | O   | . | HOH | F | 4 | . | ? | 8.026  | 9.832   | 35.707  | 1.00 | 68.74 | ? | ? | ? | ? | ? | ? | ? | ? | ? | ? | 102 | HOH | B | O   | 1 |
| HETATM | 527 | O  | O   | . | HOH | F | 4 | . | ? | 15.975 | -1.008  | 15.507  | 1.00 | 52.27 | ? | ? | ? | ? | ? | ? | ? | ? | ? | ? | 103 | HOH | B | O   | 1 |

|        |     |   |   |   |     |   |   |   |   |        |        |        |      |       |   |   |   |   |   |   |   |   |   |   |     |     |   |   |   |
|--------|-----|---|---|---|-----|---|---|---|---|--------|--------|--------|------|-------|---|---|---|---|---|---|---|---|---|---|-----|-----|---|---|---|
| HETATM | 528 | O | O | . | HOH | F | 4 | . | ? | 14.793 | -2.822 | 15.169 | 1.00 | 58.11 | ? | ? | ? | ? | ? | ? | ? | ? | ? | ? | 104 | HOH | B | O | 1 |
| HETATM | 529 | O | O | . | HOH | F | 4 | . | ? | -0.287 | 5.138  | 4.841  | 1.00 | 62.89 | ? | ? | ? | ? | ? | ? | ? | ? | ? | ? | 105 | HOH | B | O | 1 |
| HETATM | 530 | O | O | . | HOH | F | 4 | . | ? | 2.869  | 1.485  | 6.566  | 1.00 | 45.01 | ? | ? | ? | ? | ? | ? | ? | ? | ? | ? | 106 | HOH | B | O | 1 |
| HETATM | 531 | O | O | . | HOH | F | 4 | . | ? | 2.751  | 0.192  | 9.510  | 0.50 | 39.34 | ? | ? | ? | ? | ? | ? | ? | ? | ? | ? | 107 | HOH | B | O | 1 |
| HETATM | 532 | O | O | . | HOH | F | 4 | . | ? | 17.774 | 2.975  | 22.558 | 1.00 | 57.77 | ? | ? | ? | ? | ? | ? | ? | ? | ? | ? | 108 | HOH | B | O | 1 |
| HETATM | 533 | O | O | . | HOH | F | 4 | . | ? | 16.850 | 0.536  | 28.081 | 1.00 | 66.55 | ? | ? | ? | ? | ? | ? | ? | ? | ? | ? | 109 | HOH | B | O | 1 |
| HETATM | 534 | O | O | . | HOH | F | 4 | . | ? | 8.401  | -1.858 | 12.571 | 0.50 | 37.14 | ? | ? | ? | ? | ? | ? | ? | ? | ? | ? | 110 | HOH | B | O | 1 |
| HETATM | 535 | O | O | . | HOH | F | 4 | . | ? | 5.873  | -5.073 | 9.869  | 1.00 | 47.64 | ? | ? | ? | ? | ? | ? | ? | ? | ? | ? | 111 | HOH | B | O | 1 |
| HETATM | 536 | O | O | . | HOH | F | 4 | . | ? | 6.830  | 8.002  | 40.323 | 1.00 | 55.54 | ? | ? | ? | ? | ? | ? | ? | ? | ? | ? | 112 | HOH | B | O | 1 |
| HETATM | 537 | O | O | . | HOH | F | 4 | . | ? | 12.523 | -2.219 | 4.994  | 1.00 | 56.73 | ? | ? | ? | ? | ? | ? | ? | ? | ? | ? | 113 | HOH | B | O | 1 |
| HETATM | 538 | O | O | . | HOH | F | 4 | . | ? | 8.144  | 3.642  | 30.083 | 1.00 | 38.91 | ? | ? | ? | ? | ? | ? | ? | ? | ? | ? | 114 | HOH | B | O | 1 |
| HETATM | 539 | O | O | . | HOH | F | 4 | . | ? | 10.239 | -1.894 | 19.211 | 1.00 | 41.32 | ? | ? | ? | ? | ? | ? | ? | ? | ? | ? | 115 | HOH | B | O | 1 |
| HETATM | 540 | O | O | . | HOH | F | 4 | . | ? | 11.394 | 6.208  | 23.097 | 1.00 | 61.62 | ? | ? | ? | ? | ? | ? | ? | ? | ? | ? | 116 | HOH | B | O | 1 |
| HETATM | 541 | O | O | . | HOH | F | 4 | . | ? | -8.777 | 1.487  | -2.112 | 1.00 | 70.13 | ? | ? | ? | ? | ? | ? | ? | ? | ? | ? | 117 | HOH | B | O | 1 |
| HETATM | 542 | O | O | . | HOH | F | 4 | . | ? | -1.820 | 0.663  | 3.075  | 1.00 | 52.05 | ? | ? | ? | ? | ? | ? | ? | ? | ? | ? | 118 | HOH | B | O | 1 |
| HETATM | 543 | O | O | . | HOH | F | 4 | . | ? | 21.214 | 2.225  | 19.730 | 1.00 | 65.35 | ? | ? | ? | ? | ? | ? | ? | ? | ? | ? | 119 | HOH | B | O | 1 |
| HETATM | 544 | O | O | . | HOH | F | 4 | . | ? | 16.869 | 1.303  | 20.043 | 1.00 | 54.01 | ? | ? | ? | ? | ? | ? | ? | ? | ? | ? | 120 | HOH | B | O | 1 |
| HETATM | 545 | O | O | . | HOH | F | 4 | . | ? | -2.810 | -4.632 | 7.767  | 1.00 | 63.68 | ? | ? | ? | ? | ? | ? | ? | ? | ? | ? | 121 | HOH | B | O | 1 |

#

**Table S2.** Crystal and Data Collection Statistics for the First Crystal. It was used to obtain phases for the DDD-XY duplex.

|                                      |                           |
|--------------------------------------|---------------------------|
| Space group                          | Orthorhombic $P2_12_12_1$ |
| Cell parameters (Å)                  | a=26.4, b=37.3, c=77.6    |
| Temperature of data collection (° C) | -170                      |
| Wavelength (Å)                       | 1.605                     |
| Min resolution (Å)                   | 26.9                      |
| Max resolution (Å)                   | 1.95                      |
| Unique reflections (observed)        | 5861                      |
| Completeness all(%) / 1.98-1.95 Å    | 99.0/98.0                 |
| I/σ (I) all / 1.98-1.95 Å            | 20.3/4.34                 |
| R <sub>merge</sub> all / 1.98-1.95 Å | 0.08/0.63                 |
| R <sub>work</sub>                    | 0.36                      |
| R <sub>free</sub>                    | 0.39                      |
| Number of DNA atoms                  | 427                       |
| Number of water molecules            | 14                        |
| Number of ions                       | 4 Ba <sup>2+</sup>        |



**Table S3.** Crystal Data, Data Collection, and Refinement Statistics for the Second Crystal. It was used to obtain the final structure of the DDD-XY duplex.

|                                      |                           |
|--------------------------------------|---------------------------|
| Space group                          | Orthorhombic $P2_12_12_1$ |
| Cell parameters (Å)                  | a=26.38, b=36.77, c=77.65 |
| Temperature of data collection (° C) | -170                      |
| Wavelength (Å)                       | 0.97857                   |
| Min resolution (Å)                   | 30.0                      |
| Max resolution (Å)                   | 1.7                       |
| Unique reflections (all)             | 8811                      |
| Unique reflections (observed)        | 8236                      |
| Completeness all/1.76-1.70 Å (%)     | 93.4/61.1                 |
| Redundancy all/1.76-1.70 Å           | 6.4/4.0                   |
| $I/\sigma(I)$ all/1.76-1.70 Å        | 52.3/5.65                 |
| $R_{\text{merge}}$ all/1.76-1.70 Å   | 0.04/0.23                 |
| $R_{\text{work}}$                    | 0.26                      |
| $R_{\text{free}}$                    | 0.30                      |
| Number of DNA atoms                  | 481                       |
| Number of water molecules            | 49                        |
| Number of ions                       | 1 $\text{Sr}^{2+}$        |
| r.m.s. distances (Å)                 | 0.01                      |
| r.m.s. angles (°)                    | 1.6                       |

**Table S4.** NMR Restraints Used for the DDD-GY Structure Calculations and Refinement Statistics.

| NMR restraints                                                            |           |
|---------------------------------------------------------------------------|-----------|
| NOE restraints                                                            |           |
| Internucleotide                                                           | 75        |
| Intranucleotide                                                           | 78        |
| Total                                                                     | 153       |
| Backbone torsion angle restraints                                         | 100       |
| H-bonding restraints                                                      | 50        |
| Deoxyribose restraints                                                    | 18        |
| Total number of restraints                                                | 321       |
| Refinement Statistics                                                     |           |
| Number of distance restraint violations                                   | 25        |
| Number of torsion restraint violations                                    | 14        |
| Total distance penalty/Maximum penalty [kcal mol <sup>-1</sup> ]          | 2.60/0.46 |
| Total torsion penalty/Maximum penalty [kcal mol <sup>-1</sup> ]           | 1.24/0.36 |
| r.m.s. distances (Å)                                                      | 0.012     |
| r.m.s. angles (°)                                                         | 2.4       |
| Distance restraint force field [kcal mol <sup>-1</sup> Å <sup>-2</sup> ]  | 32        |
| Torsion restraint force field [kcal mol <sup>-1</sup> deg <sup>-2</sup> ] | 32        |

**Table S5.** Structural Statistics for the DDD-GY Duplex.

|                                                   |                 |                 |       |
|---------------------------------------------------|-----------------|-----------------|-------|
| Average structure (obtained from 9 structures)    |                 |                 |       |
| RMS pairwise difference between structures        |                 | 0.71            |       |
| RMS difference from average structure             |                 | 0.47            |       |
| CORMA analysis for average structure <sup>a</sup> |                 |                 |       |
|                                                   | Intranucleotide | Internucleotide | Total |
| Rx <sup>b</sup>                                   | 0.10            | 0.10            | 0.10  |
| Average error <sup>c</sup>                        |                 |                 | 0.02  |

<sup>a</sup> The mixing time was 250 ms. <sup>b</sup> Rx is 6th root R factor:  $\Sigma[(I_o)_i^{1/6} - (I_c)_i^{1/6}] / \Sigma(I_o)_i^{1/6}$ . <sup>c</sup> Average error:

$\Sigma(I_c - I_o) / n$ , where  $I_c$  are NOE intensities calculated from refined structure,  $I_o$  are experimental NOE intensities.

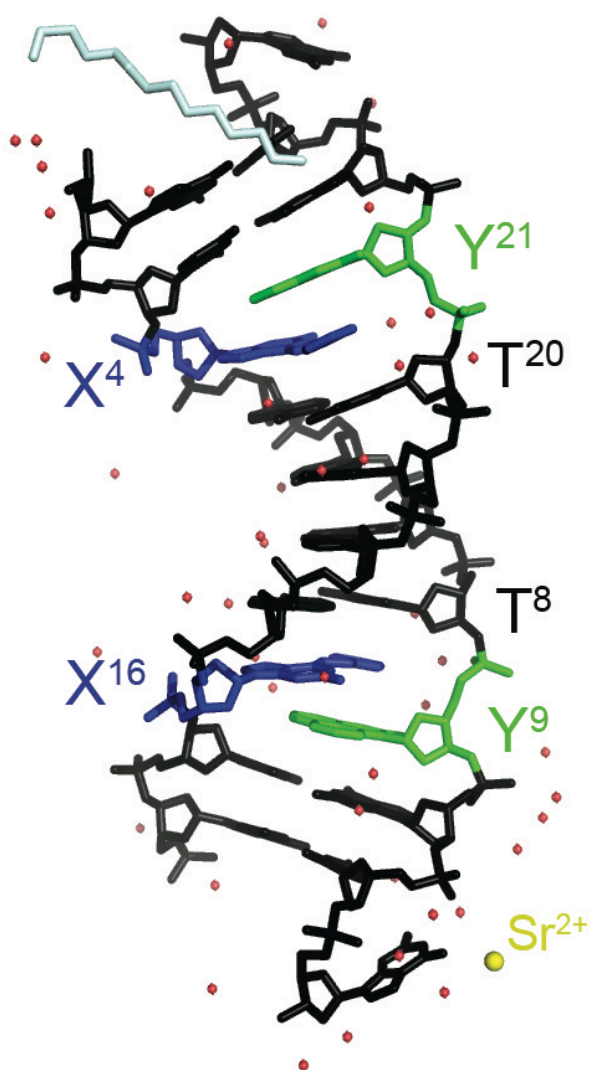

**Figure S1.** Structure of the DDD-XY duplex with water molecules (red spheres) and  $\text{Sr}^{2+}$  ion (yellow sphere) and spermine molecule (light blue). The benzyl groups of  $O^6$ -Bn-dG (shown in blue) intercalate between the thymine and dPer bases (shown in green) from the opposite strand. The dPer bases are in the *syn* conformation about the glycosyl bond. Electron density for bases  $C^1$  and  $C^{13}$  was not visible. Bases  $G^{12}$  and  $G^{24}$  flipped out from the duplex. The intercalated structures unwind the duplex as compared to the unmodified DDD.

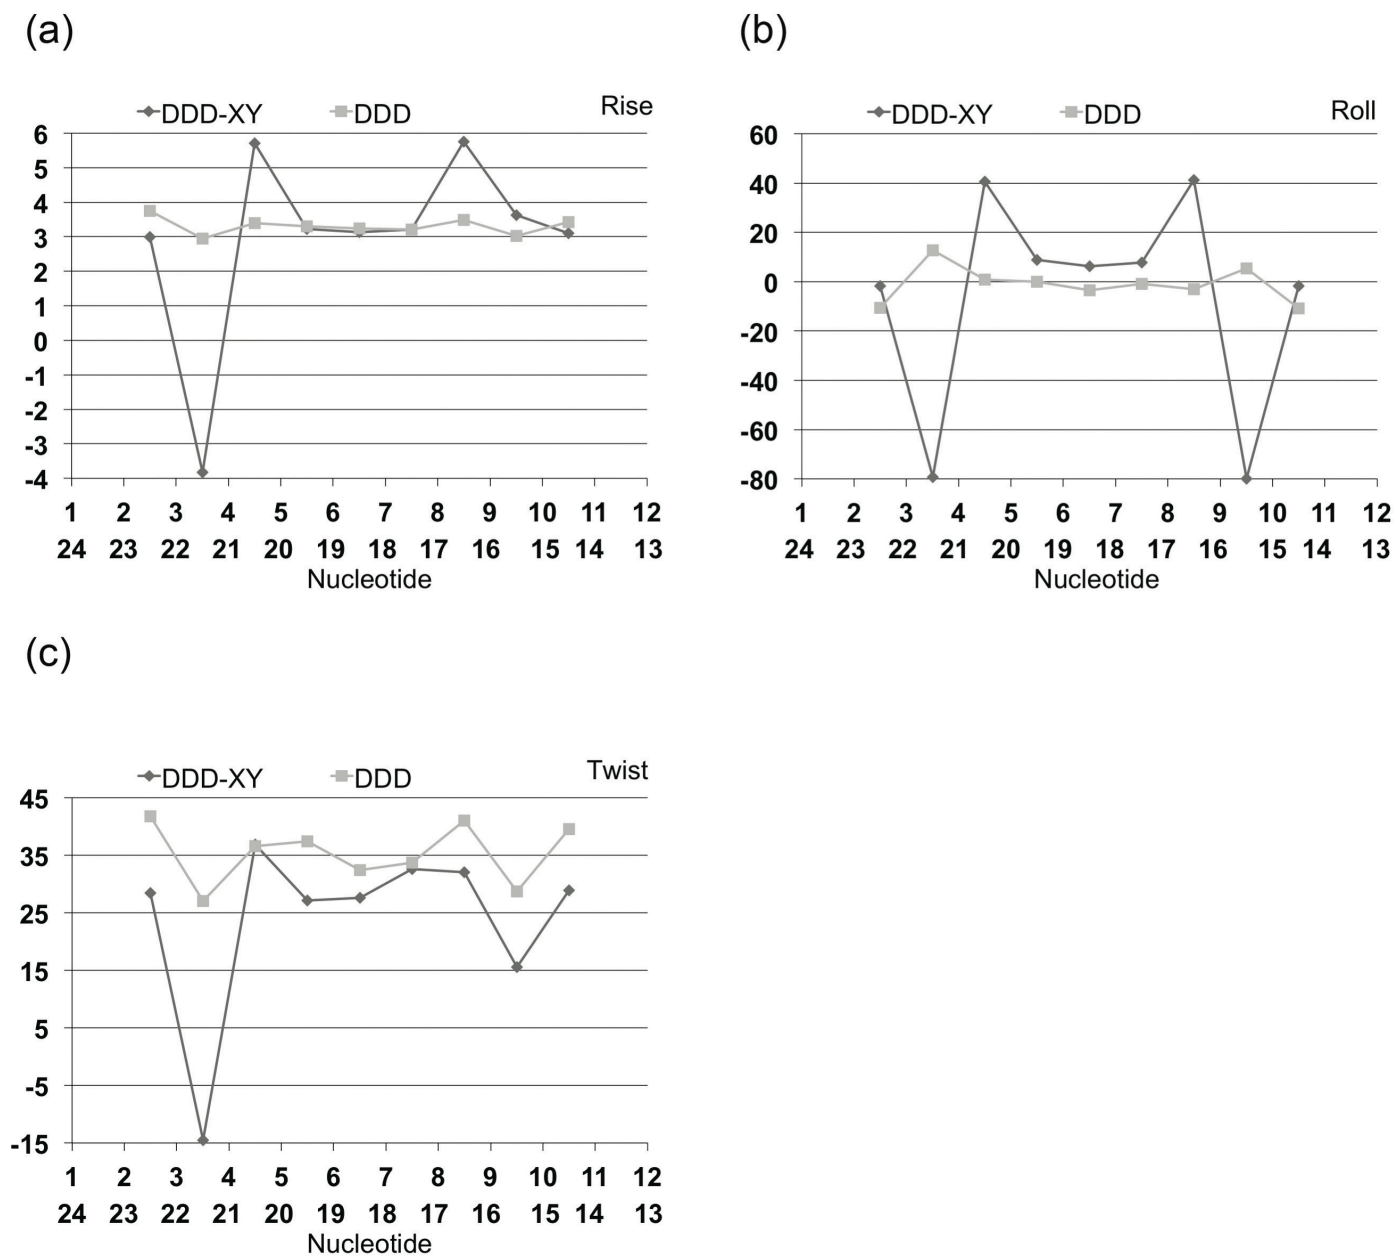

**Figure S2.** Interbase pair parameters: (a) helical rise, (b) roll and (c) twist for the DDD-XY, DDD (PDB entry 355D) duplexes.

(a)

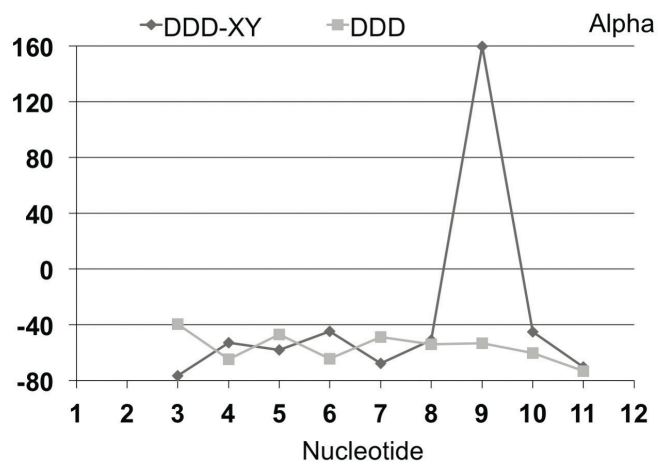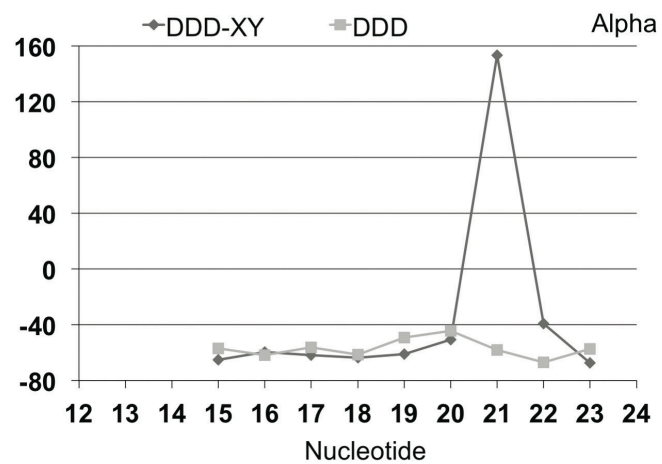

(b)

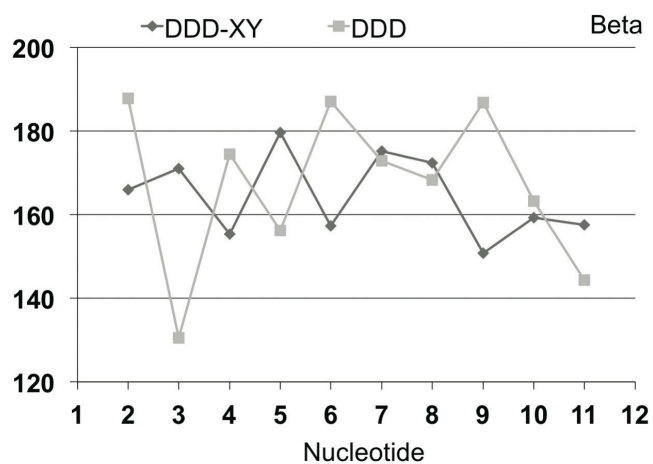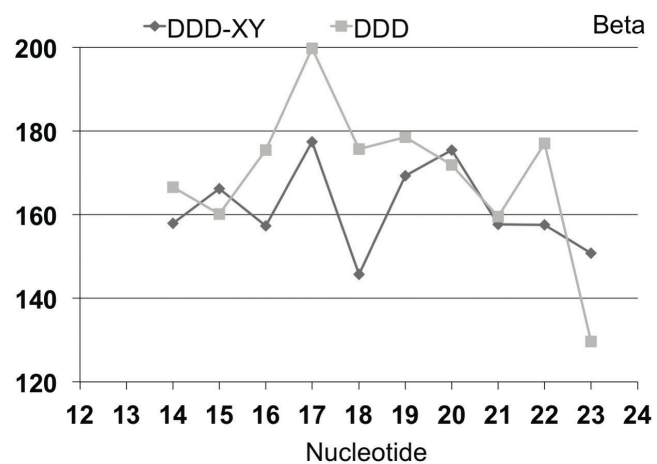

**Figure S3.** Comparison of backbone torsion angles (a)  $\alpha$  and (b)  $\beta$  in the crystal

structures of the DDD-XY, DDD (PDB entry 355D) duplexes.

(a)

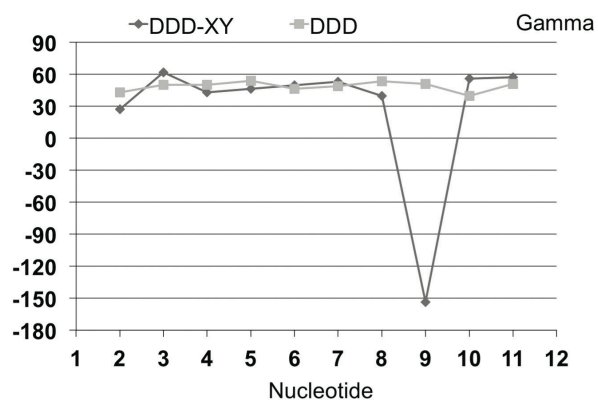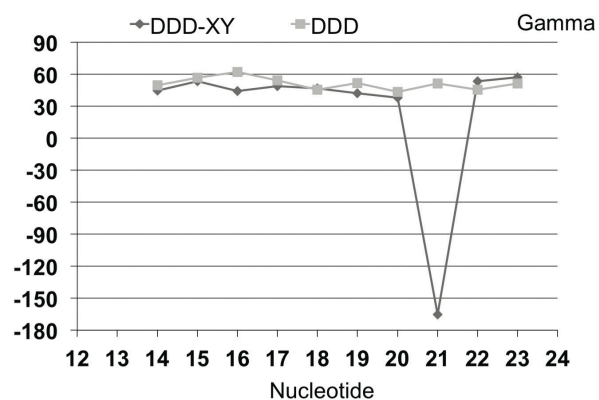

(b)

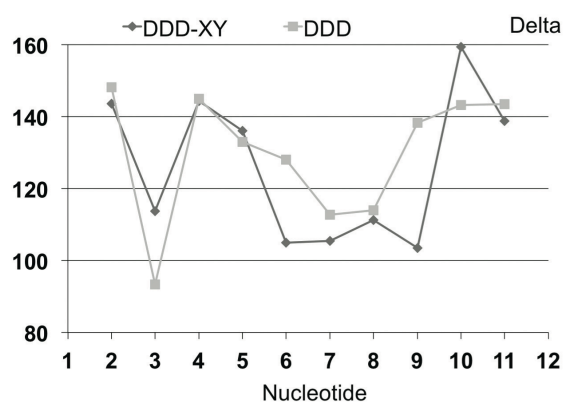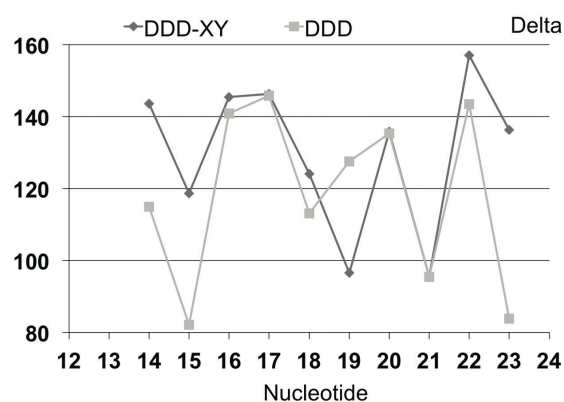

(c)

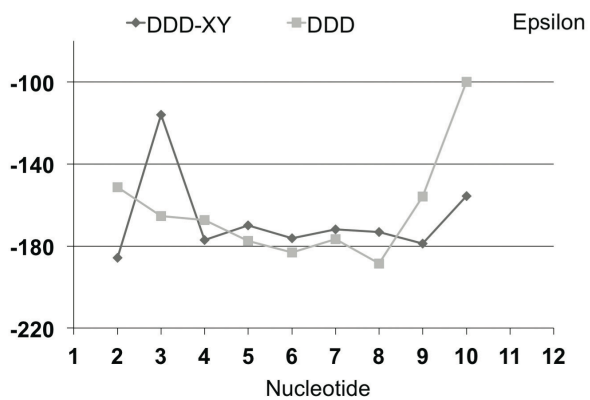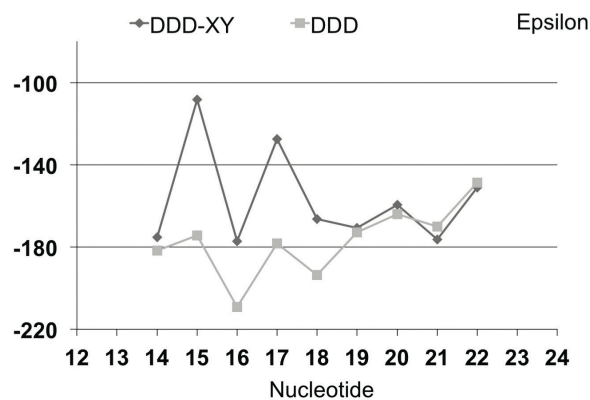

**Figure S4.** Comparison of (a)  $\gamma$ , (b)  $\delta$ , (c)  $\epsilon$  angles in the crystal structures of the DDD-XY, DDD (PDB entry 355D) duplexes.

(a)

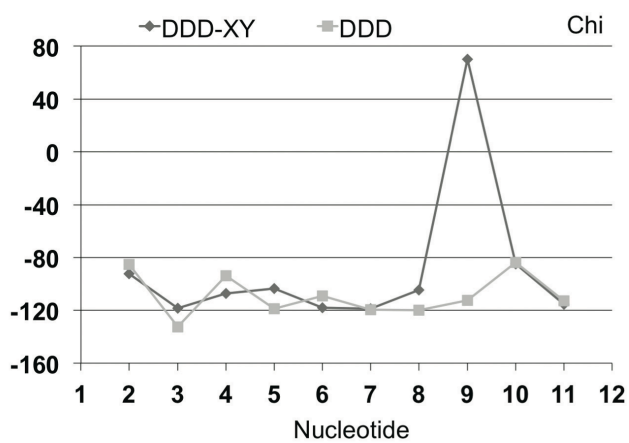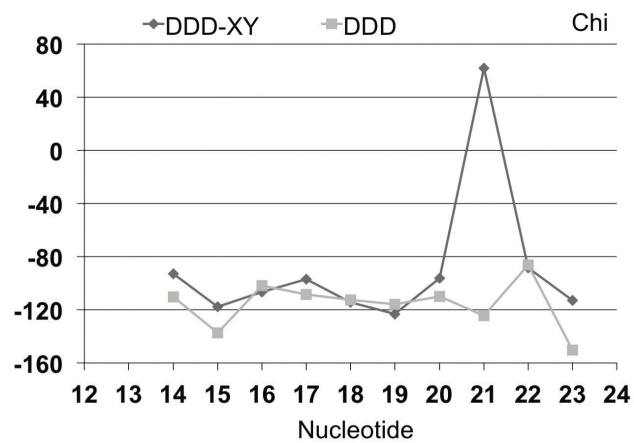

(b)

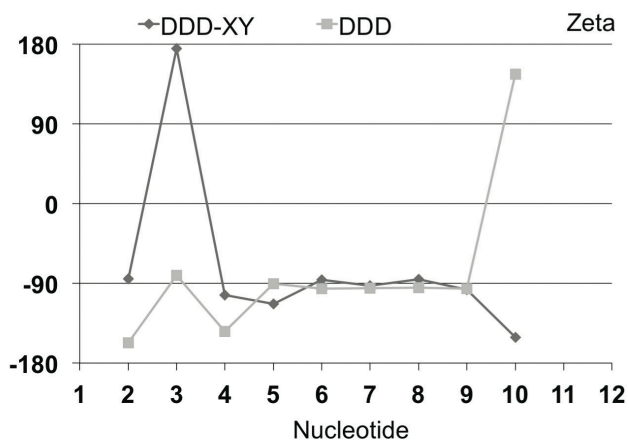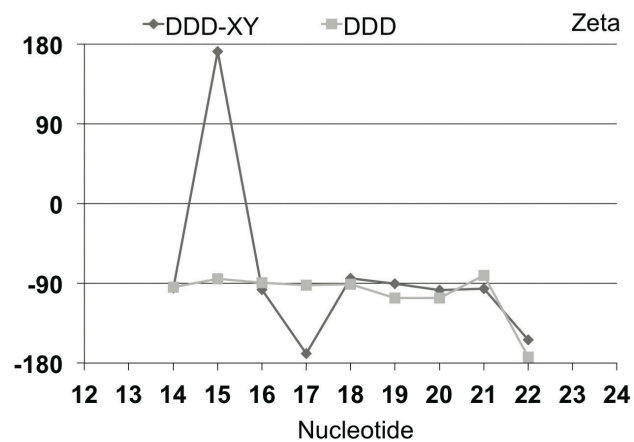

**Figure S5.** Comparison of (a)  $\chi$  and (b)  $\zeta$  angles in the crystal structures of the DDD-XY, DDD (PDB entry 355D) duplexes.



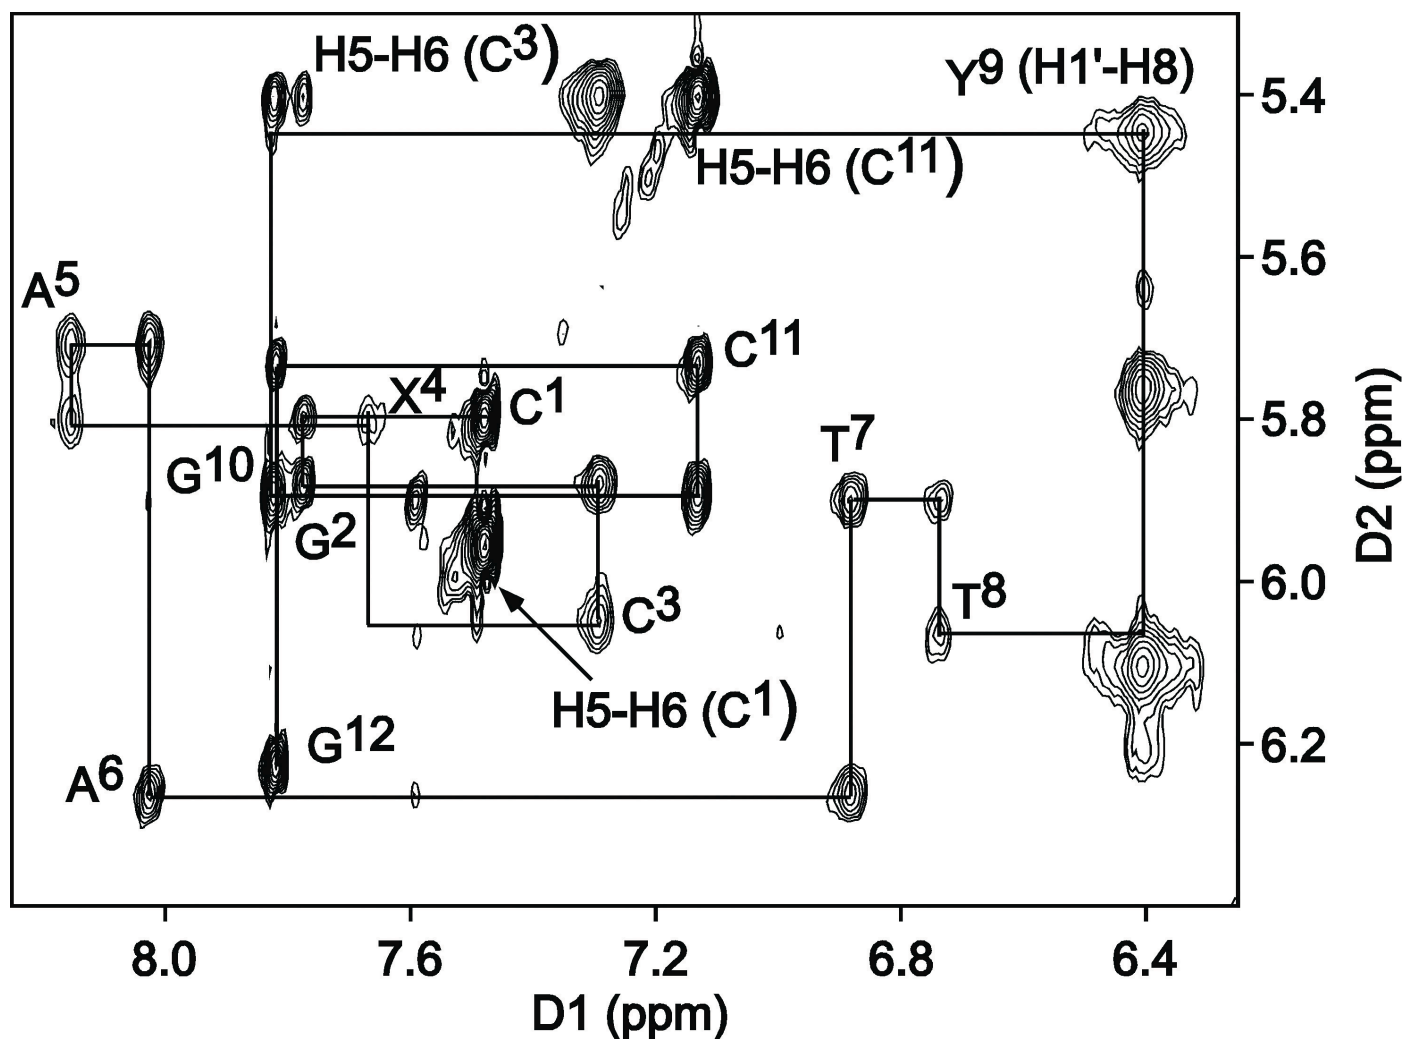

**Figure S6.** NOESY spectrum of the DDD-XY duplex showing sequential NOEs between the aromatic and anomeric protons from C<sup>1</sup> to G<sup>12</sup>. The spectrum was collected at 10 °C at 900 MHz with 250 ms mixing time.

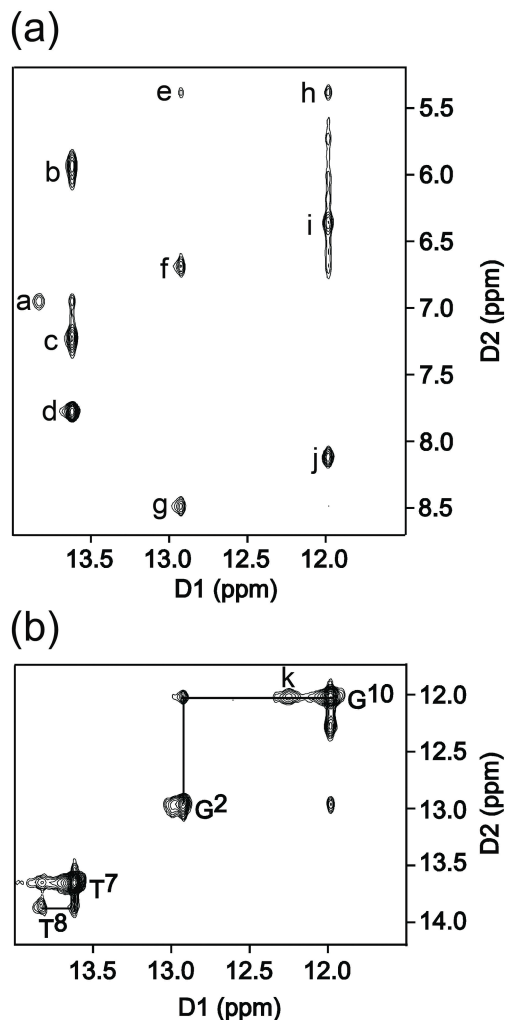

**Figure S7.** (a) Interstrand NOE cross peaks between complementary bases for the DDD-XY duplex: a, A<sup>5</sup> H2→T<sup>8</sup> N3H; b, A<sup>5</sup> N<sup>6</sup>H2→T<sup>7</sup> N3H; c, A<sup>6</sup> N<sup>2</sup>H2→T<sup>7</sup> N3H; d, A<sup>6</sup> H2→T<sup>7</sup> N3H; e, C<sup>11</sup> H5→G<sup>2</sup> N1H; f, C<sup>11</sup> N<sup>2</sup>H1→G<sup>2</sup> N1H; g, C<sup>11</sup> N<sup>2</sup>H2→G<sup>2</sup> N1H; h, C<sup>3</sup> H5→G<sup>10</sup> N1H; i, C<sup>3</sup> N<sup>2</sup>H1→G<sup>10</sup> N1H; j, C<sup>3</sup> N<sup>2</sup>H2→G<sup>10</sup> N1H. (b) NOE connectivity of DDD-XY duplex, for the imino protons for the base pairs G<sup>2</sup>:C<sup>11</sup>, C<sup>3</sup>:G<sup>10</sup>, X<sup>4</sup>:Y<sup>9</sup>, A<sup>5</sup>:T<sup>8</sup>, A<sup>5</sup>:T<sup>7</sup>. Cross peaks between T<sup>8</sup> N3H→T<sup>7</sup> N3H and G<sup>2</sup> N1H→G<sup>10</sup> N1H were present. There is no cross-peak between T<sup>8</sup>→Y<sup>9</sup> and Y<sup>9</sup>→G<sup>10</sup>. G<sup>10</sup> N1H has a cross peak with peak which is not visible on the diagonal and could not be assigned (k). The experiment was carried out at 500 MHz using a mixing time of 250 ms and at 7 °C.

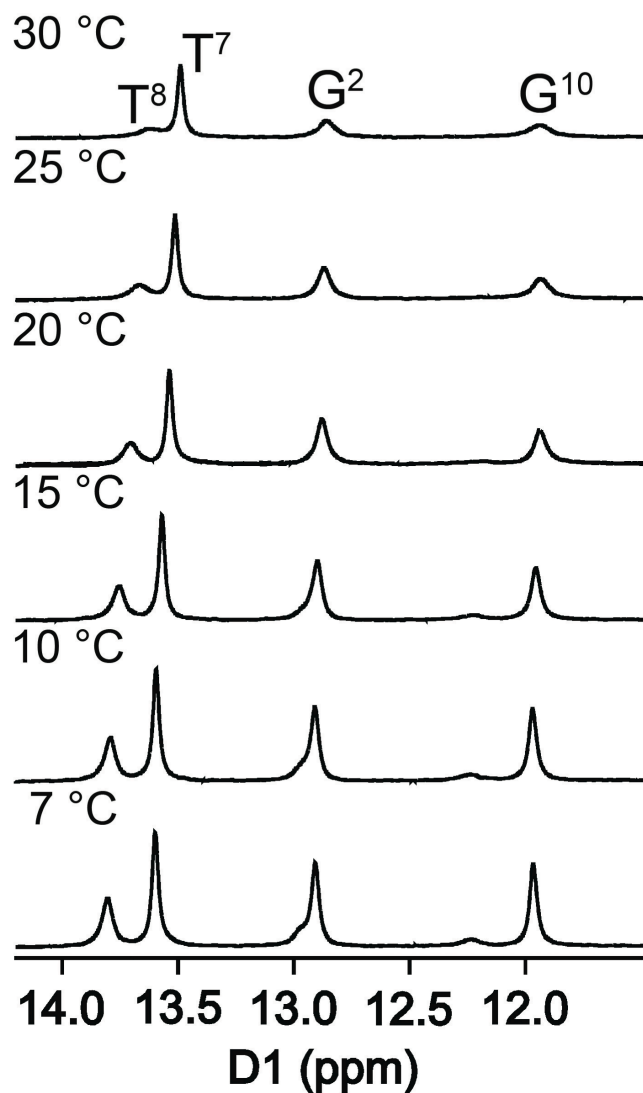

**Figure S8.** One-dimensional NMR spectra, showing the imino proton resonances for the DDD-XY duplex as a function of temperature. Note that the imine nitrogen of the *O*<sup>6</sup>-Bn-dG nucleotide X<sup>4</sup> is not protonated at neutral pH. The individual nucleotides are identified as superscripts. The experiments were carried out at 500 MHz.

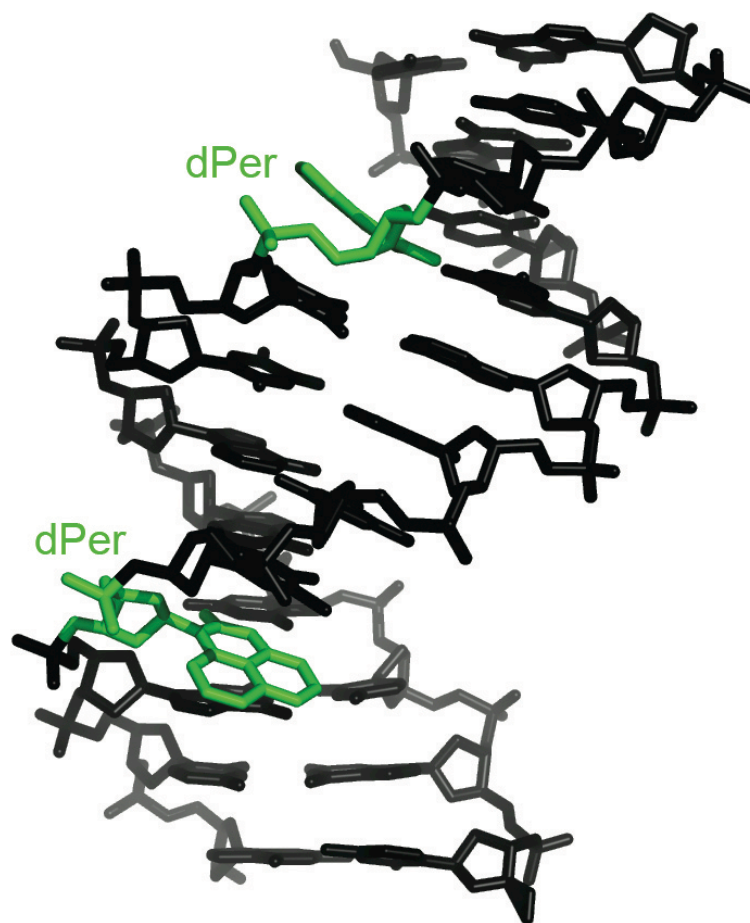

**Figure S9.** The average structure obtained from a series of rMD calculations for the DDD-GY duplex. dPer bases are shown in green. The dPer base is in the *anti* conformation about the glycosyl bond and it forms wobble pair with the complementary dG. The dPer ring is oriented in the major groove. Hydrogens are omitted on the picture for clarity.

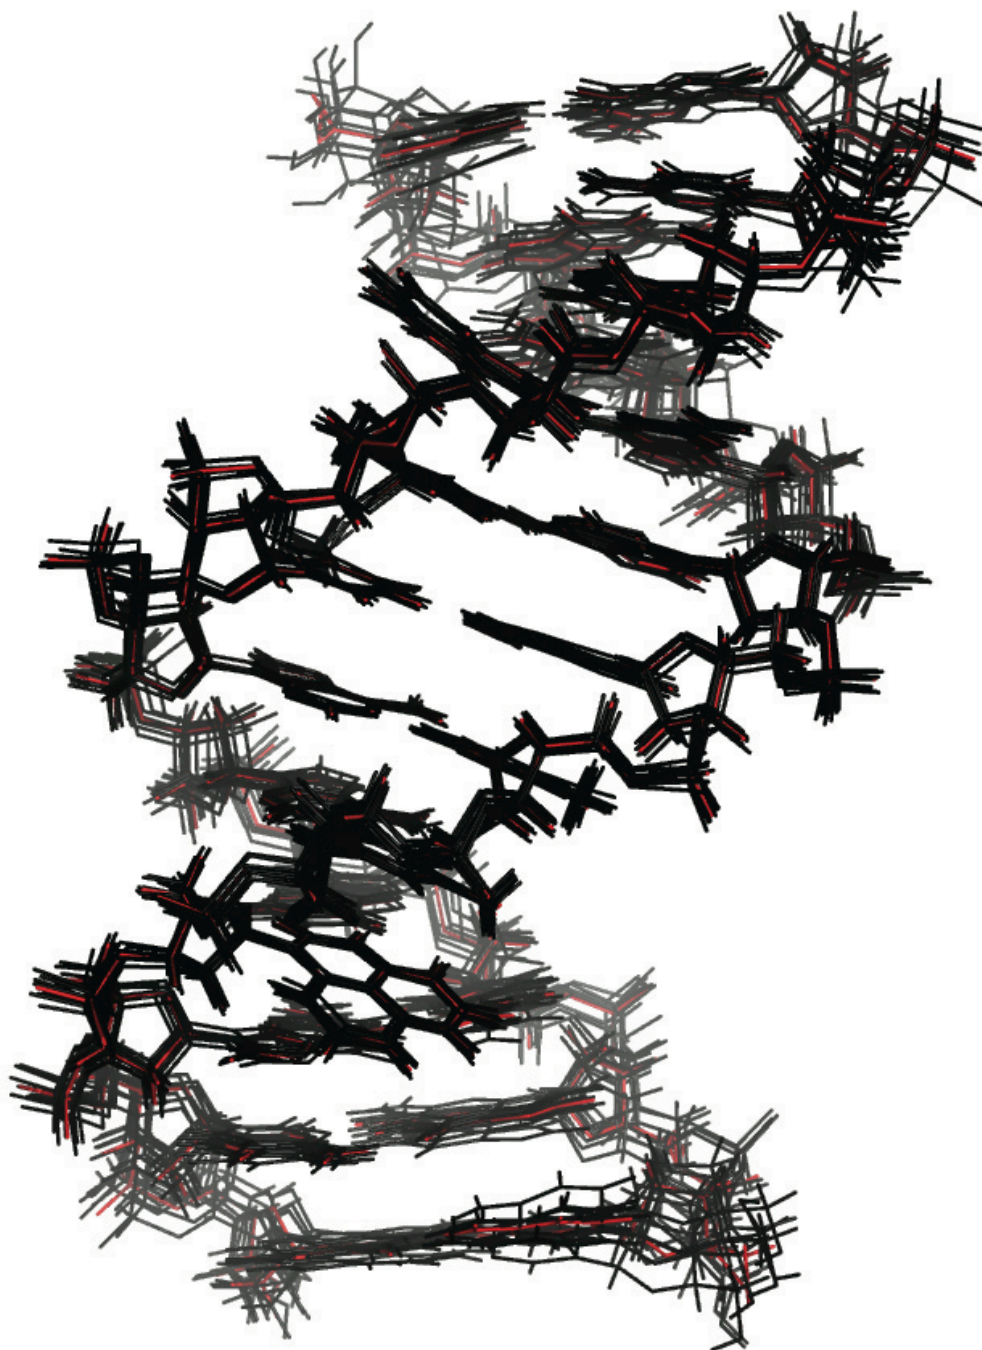

**Figure S10.** The superimposed nine structures obtained from a series of rMD calculations for the DDD-GY duplex. The average structure obtained from nine structures is shown in red.

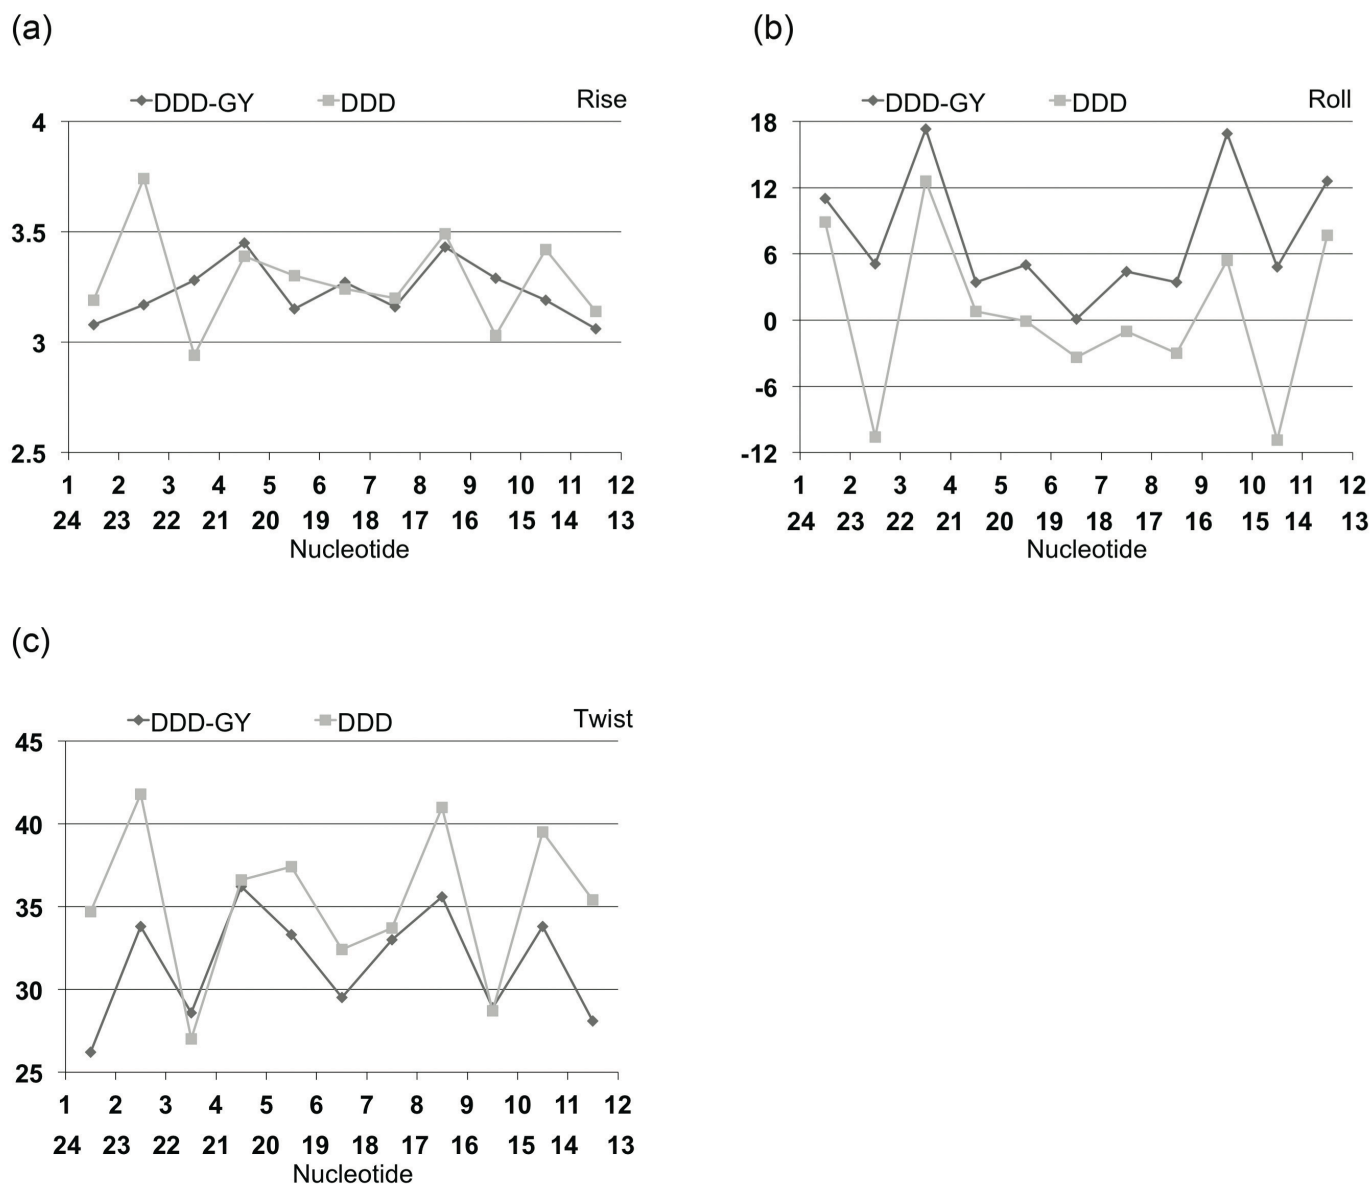

**Figure S11.** Interbase pair parameters: (a) helical rise, (b) roll and (c) twist for the DDD-GY, DDD (PDB entry 355D) duplexes.

(a)

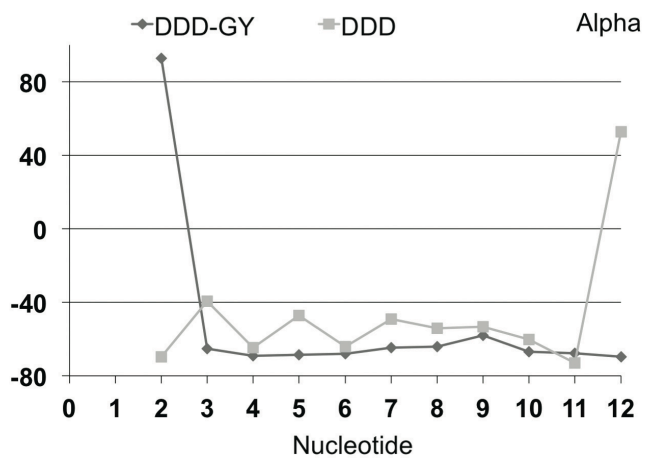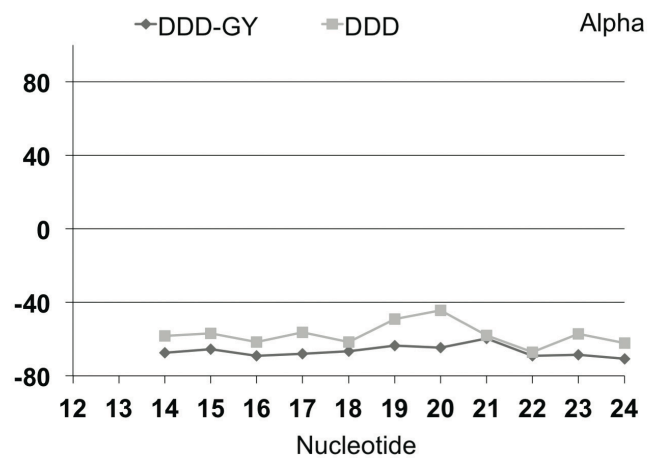

(b)

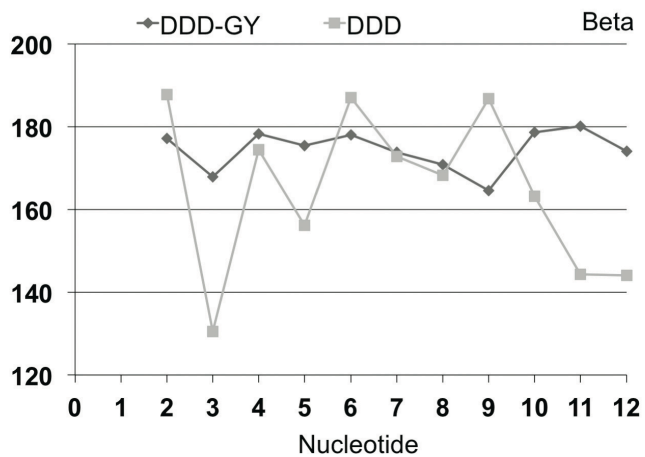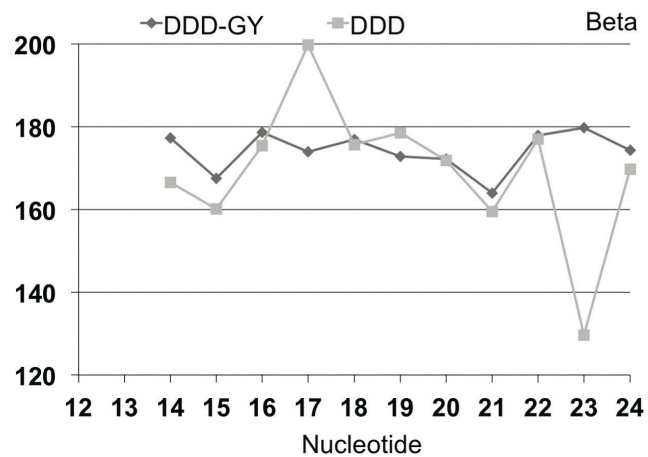

**Figure S12.** Comparison of backbone torsion angles (a)  $\alpha$  and (b)  $\beta$  in the structures of the DDD-GY, DDD (PDB entry 355D) duplexes.

(a)

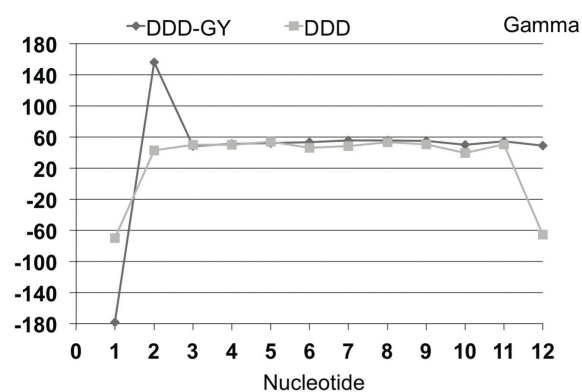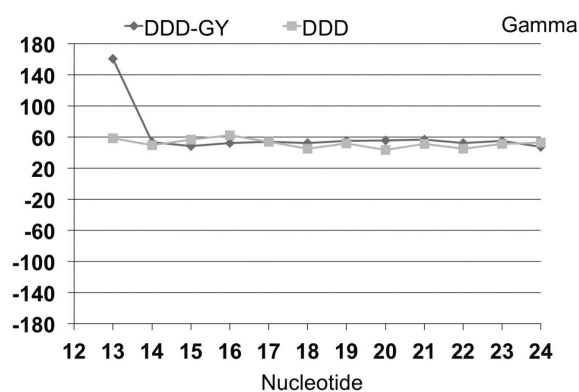

(b)

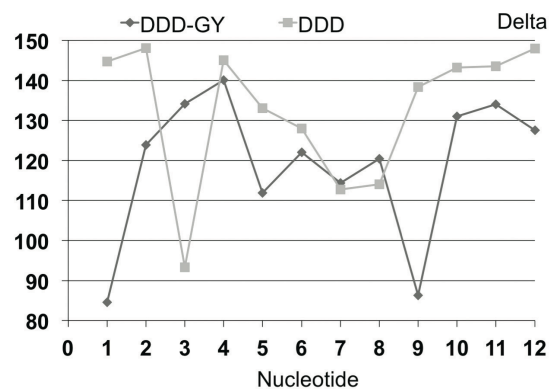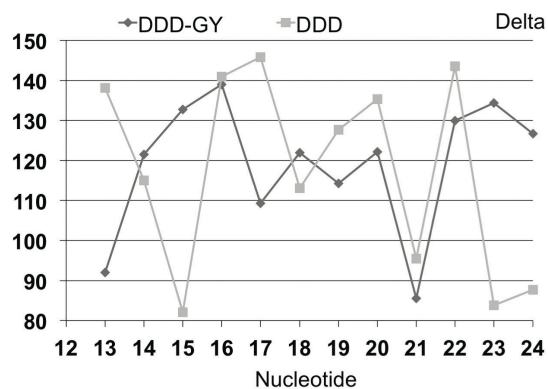

(c)

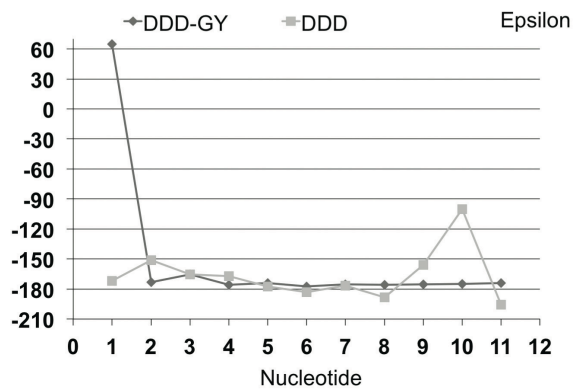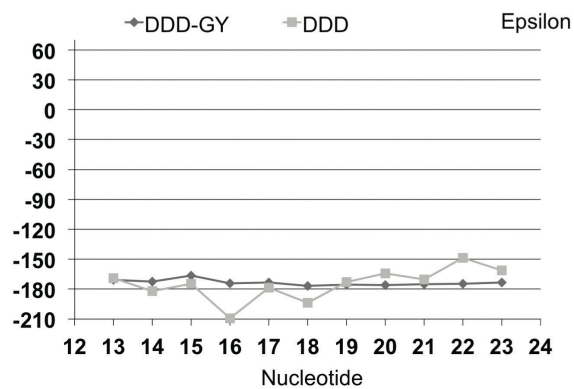

**Figure S13.** Comparison of (a)  $\gamma$ , (b)  $\delta$ , (c)  $\epsilon$  angles in the structures of the DDD-GY, DDD (PDB entry 355D) duplexes.



(a)

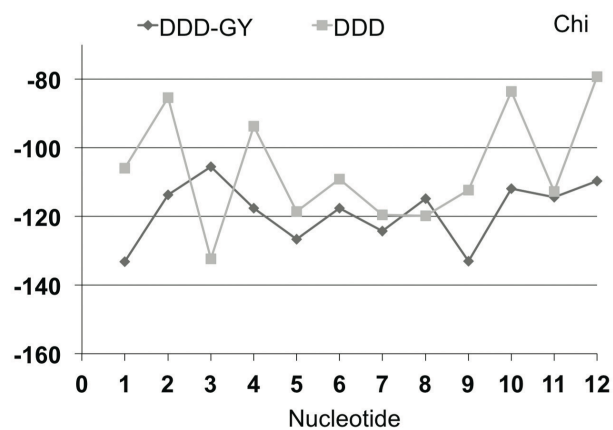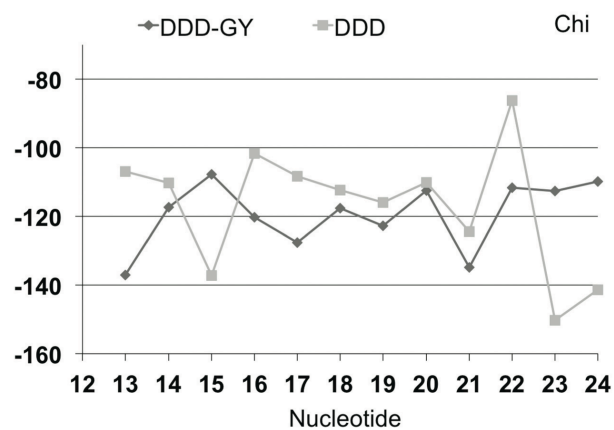

(b)

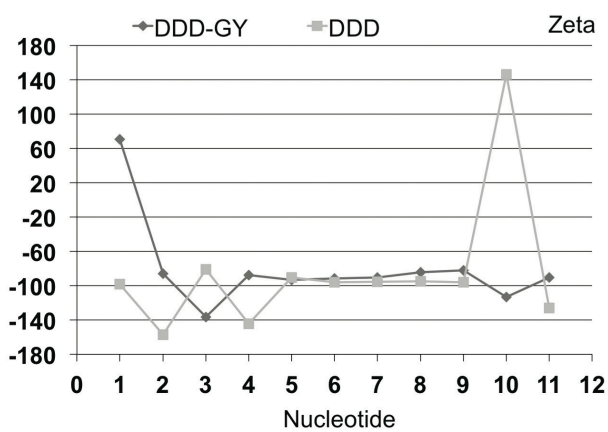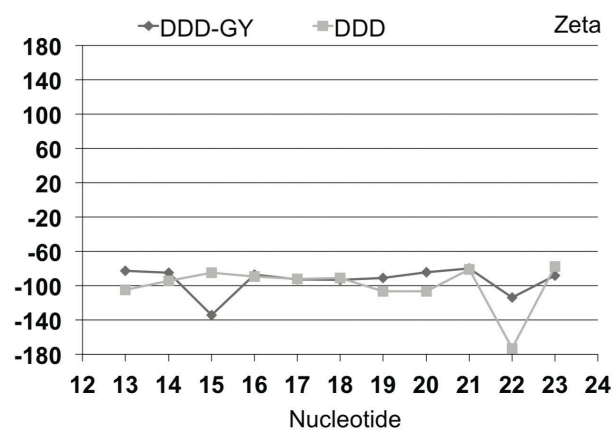

**Figure S14.** Comparison of (a)  $\chi$  and (b)  $\zeta$  angles in the crystal structures of the DDD-GY, DDD (PDB entry 355D) duplexes.
